# Supplementary material for: Synthesis and biological evaluation of potential new inhibitors of the bacterial transferase MraY with a β-ketophosphonate structure
Source: Royal Society of Chemistry journal article supplement (doi:10.1039/c1ob06124k), 2011-01-01

## Electronic Supplementary information for:

# Synthesis and biological evaluation of potential new inhibitors of the bacterial transferase MraY with a $\beta$ -ketophosphonate structure†

Nicolas Auberger,<sup>a</sup> Rok Frlan,<sup>a,b</sup>  
Bayan Al-Dabbagh,<sup>c,d</sup> Ahmed Bouhss,<sup>c</sup> Muriel Crouvoisier,<sup>c</sup>  
Christine Gravier-Pelletier<sup>a,\*</sup> and Yves Le Merrer<sup>a</sup>

## 1. Numbering system

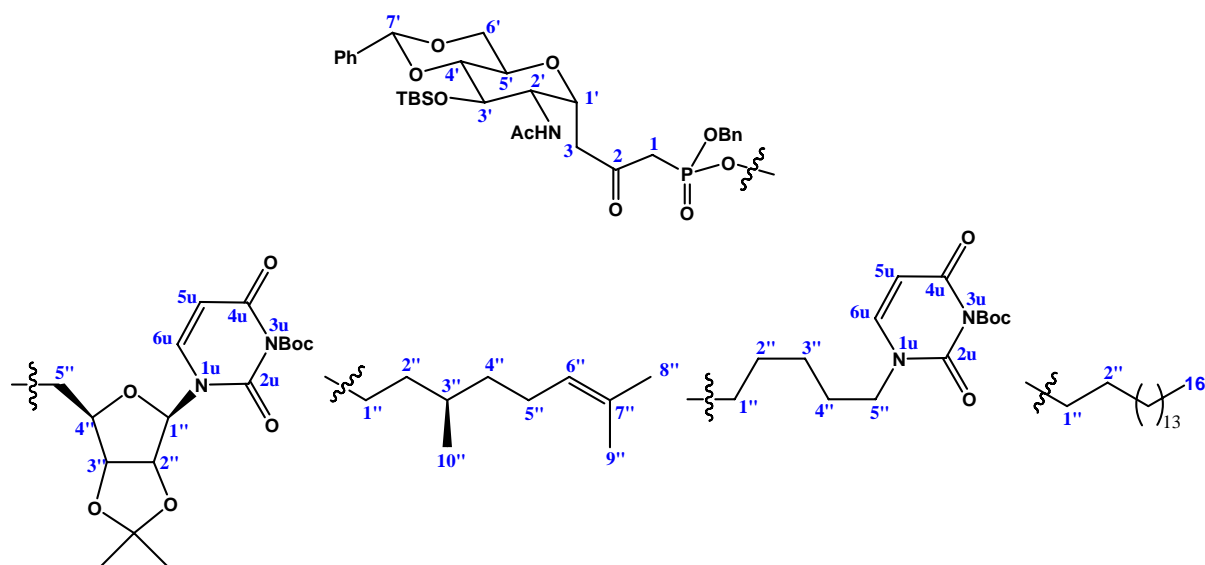

## 2. Comprehensive experimental section

When a compound is obtained as a mixture of epimers, two situations may happen:

- 1) One of both epimers is largely predominant: in this case, only one is described.
- 2) The epimers are both present in substantial quantities: if the distinction between a major epimer and a minor one is possible, they are marked by symbols : \* (major) and ° (minor).

“eq” and “ax” are used for description of respectively equatorial and axial protons.

### 3-(2-Acetamido-4,6-*O*-(*R*)-benzylidene-3-*O*-*tert*-butyldimethylsilyl-2-deoxy- $\alpha$ -D-glucopyranosyl)-prop-1-ene **2 $\alpha$** and 3-(2-acetamido-4,6-*O*-(*R*)-benzylidene-3-*O*-*tert*-butyldimethylsilyl-2-deoxy- $\beta$ -D-glucopyranosyl)-prop-1-ene **2 $\beta$**

To a solution of **1** (6.00 g, 18 mmol) in DMF (180 mL) were added *tert*-butyldimethylsilyl chloride (6.78 g, 45 mmol, 2.5 eq.) and imidazole (4.90 g, 72 mmol, 4 eq.). The reaction mixture was stirred at r.t. for 16 h and concentrated to dryness. The residue was then dissolved in CH<sub>2</sub>Cl<sub>2</sub> and washed with saturated aqueous NH<sub>4</sub>Cl solution, dried (MgSO<sub>4</sub>) and concentrated. Purification by flash chromatography (CH<sub>2</sub>Cl<sub>2</sub>/acetone, 9:1) afforded **2 $\beta$**  (480 mg, 6%, white solid): *R*<sub>f</sub> 0.72 (CH<sub>2</sub>Cl<sub>2</sub>/acetone = 9:1); mp 159 °C; [ $\alpha$ ]<sub>D</sub><sup>20</sup> - 58 (*c* 1.0, CH<sub>2</sub>Cl<sub>2</sub>);

$^1\text{H}$  NMR  $\delta$  7.49-7.45 (m, 2H,  $\text{H}_{\text{ar}}$ ), 7.37-7.33 (m, 3H,  $\text{H}_{\text{ar}}$ ), 5.86 (ddt, 1H,  $J_{\text{H2-H1trans}} = 17.1$  Hz,  $J_{\text{H2-H1cis}} = 10.3$  Hz,  $J_{\text{H2-H3}} = 6.8$  Hz,  $\text{H}_2$ ), 5.61 (d, 1H,  $J_{\text{NH-H2}'} = 9.0$  Hz, NH), 5.49 (s, 1H,  $\text{H}_7$ ), 5.08 (dm, 1H,  $J_{\text{H1trans-H2}} = 17.1$  Hz,  $\text{H}_{1\text{trans}}$ ), 5.05 (dm, 1H,  $J_{\text{H1cis-H2}} = 10.3$  Hz,  $\text{H}_{1\text{cis}}$ ), 4.29 (dd, 1H,  $J_{\text{H6'eq-H6'ax}} = 10.4$  Hz,  $J_{\text{H6'eq-H5'}}$  = 4.8 Hz,  $\text{H}_{6'\text{eq}}$ ), 3.83 (dd, 1H,  $J_{\text{H3'-H2'}}$  = 9.4 Hz,  $J_{\text{H3'-H4'}}$  = 8.3 Hz,  $\text{H}_3$ '), 3.75 (ddd, 1H,  $J_{\text{H2'-H1'}}$  = 10.2 Hz,  $J_{\text{H2'-H3'}}$  = 9.4 Hz,  $J_{\text{H2'-NH}} = 9.0$  Hz,  $\text{H}_2$ '), 3.69 (dd, 1H,  $J_{\text{H6'ax-H6'eq}} = 10.4$  Hz,  $J_{\text{H6'ax-H5'}}$  = 9.8 Hz,  $\text{H}_{6'\text{ax}}$ ), 3.52 (ddd, 1H,  $J_{\text{H1'-H2'}}$  = 10.2 Hz,  $J_{\text{H1'-H3a}}$  = 7.7 Hz,  $J_{\text{H1'-H3b}}$  = 3.2 Hz,  $\text{H}_1$ '), 3.45 (dd, 1H,  $J_{\text{H4'-H5'}}$  = 9.3 Hz,  $J_{\text{H4'-H3'}}$  = 8.3 Hz,  $\text{H}_4$ '), 3.39 (ddd, 1H,  $J_{\text{H5'-H6'ax}} = 9.8$  Hz,  $J_{\text{H5'-H4'}}$  = 9.3 Hz,  $J_{\text{H5'-H6'eq}} = 4.8$  Hz,  $\text{H}_5$ '), 2.42-2.35, 2.30-2.23 (2m, 2H,  $\text{H}_3$ ), 1.99 (s, 3H,  $\text{CH}_3\text{CO}$ ), 0.82 (s, 9H,  $\text{Si}t\text{Bu}$ ), 0.02, -0.04 (2s, 6H,  $\text{SiMe}$ );  $^{13}\text{C}$  NMR  $\delta$  170.0 ( $\text{CH}_3\text{CO}$ ), 137.4, 129.1, 128.2, 126.5 ( $\text{C}_{\text{ar}}$ ), 134.6 ( $\text{C}_2$ ), 117.1 ( $\text{C}_1$ ), 102.0 ( $\text{C}_7$ ), 82.7 ( $\text{C}_4$ '), 79.0 ( $\text{C}_1$ '), 73.8 ( $\text{C}_3$ '), 70.5 ( $\text{C}_5$ '), 69.0 ( $\text{C}_6$ '), 57.1 ( $\text{C}_2$ '), 36.7 ( $\text{C}_3$ ), 25.8 ( $\text{Si}t\text{Bu}$ ), 23.9 ( $\text{CH}_3\text{CO}$ ), 18.2 ( $\text{Si}t\text{Bu}$ ), -3.8, -4.8 ( $\text{SiMe}$ ).

Further elution afforded **2 $\alpha$**  (7.19 g, 89%, white solid):  $R_f$  0.62 ( $\text{CH}_2\text{Cl}_2/\text{acetone} = 9:1$ ); mp 210 °C;  $[\alpha]_{\text{D}}^{20} + 18$  ( $c$  1.0,  $\text{CH}_2\text{Cl}_2$ );  $^1\text{H}$  NMR  $\delta$  7.50-7.45 (m, 2H,  $\text{H}_{\text{ar}}$ ), 7.38-7.33 (m, 3H,  $\text{H}_{\text{ar}}$ ), 5.77 (dddd, 1H,  $J_{\text{H2-H1trans}} = 17.1$  Hz,  $J_{\text{H2-H1cis}} = 10.3$  Hz,  $J_{\text{H2-H3a}} = 7.6$  Hz,  $J_{\text{H2-H3b}} = 6.0$  Hz,  $\text{H}_2$ ), 5.50 (s, 1H,  $\text{H}_7$ '), 5.49 (d, 1H,  $J_{\text{NH-H2'}}$  = 7.1 Hz, NH), 5.14 (dm, 1H,  $J_{\text{H1trans-H2}} = 17.1$  Hz,  $\text{H}_{1\text{trans}}$ ), 5.11 (dm, 1H,  $J_{\text{H1cis-H2}} = 10.3$  Hz,  $\text{H}_{1\text{cis}}$ ), 4.35 (ddd, 1H,  $J_{\text{H1'-H3a}} = 10.7$  Hz,  $J_{\text{H1'-H2'}}$  = 5.6 Hz,  $J_{\text{H1'-H3b}} = 4.8$  Hz,  $\text{H}_1$ '), 4.24-4.18 (m, 2H,  $\text{H}_2$ ',  $\text{H}_{6'\text{eq}}$ ), 3.84 (dd, 1H,  $J_{\text{H3'-H4'}}$  = 10.0 Hz,  $J_{\text{H3'-H2'}}$  = 8.3 Hz,  $\text{H}_3$ '), 3.69 (dd, 1H,  $J_{\text{H4'-H3'}}$  = 10.0 Hz,  $J_{\text{H4'-H5'}}$  = 9.8 Hz,  $\text{H}_4$ '), 3.59 (ddd, 1H,  $J_{\text{H5'-H4'}}$  = 9.8 Hz,  $J_{\text{H5'-H6'ax}} = 9.4$  Hz,  $J_{\text{H5'-H6'eq}} = 4.5$  Hz,  $\text{H}_5$ '), 3.53 (dd, 1H,  $J_{\text{H6'ax-H5'}}$  = 9.4 Hz,  $J_{\text{H6'ax-H6'eq}} = 8.6$  Hz,  $\text{H}_{6'\text{ax}}$ ), 2.49 (ddd, 1H,  $J_{\text{H3a-H3b}} = 14.8$  Hz,  $J_{\text{H3a-H1'}}$  = 10.7 Hz,  $J_{\text{H3a-H2}} = 7.6$  Hz,  $\text{H}_{3\text{a}}$ ), 2.32 (ddd, 1H,  $J_{\text{H3b-H3a}} = 14.8$  Hz,  $J_{\text{H3b-H2}} = 6.0$  Hz,  $J_{\text{H3b-H1'}}$  = 4.8 Hz,  $\text{H}_{3\text{b}}$ ), 1.99 (s, 3H,  $\text{CH}_3\text{CO}$ ), 0.84 (s, 9H,  $\text{Si}t\text{Bu}$ ), 0.07, 0.00 (2s, 6H,  $\text{SiMe}$ );  $^{13}\text{C}$  NMR  $\delta$  170.2 ( $\text{CH}_3\text{CO}$ ), 137.3, 129.2, 128.3, 126.4 ( $\text{C}_{\text{ar}}$ ), 134.1 ( $\text{C}_2$ ), 117.4 ( $\text{C}_1$ ), 102.0 ( $\text{C}_7$ '), 83.4 ( $\text{C}_4$ '), 74.0 ( $\text{C}_1$ '), 70.6 ( $\text{C}_3$ '), 69.5 ( $\text{C}_6$ '), 64.0 ( $\text{C}_5$ '), 55.3 ( $\text{C}_2$ '), 31.3 ( $\text{C}_3$ ), 25.8 ( $\text{Si}t\text{Bu}$ ), 23.5 ( $\text{CH}_3\text{CO}$ ), 18.3 ( $\text{Si}t\text{Bu}$ ), -3.7, -4.7 ( $\text{SiMe}$ ); MS (ESI):  $m/z = 917$  [ $2\text{M}+\text{Na}$ ] $^+$  100%; HRMS calcd for  $\text{C}_{24}\text{H}_{37}\text{NNaO}_5\text{Si}^+$  470.2339, found 470.2336.

### Methyl 2-(2-acetamido-4,6-*O*-(*R*)-benzylidene-3-*O*-*tert*-butyldimethylsilyl-2-deoxy- $\alpha$ -D-glucopyranosyl)acetate **3**

To a solution of **2 $\alpha$**  (2.00 g, 4.47 mmol) in  $\text{CH}_2\text{Cl}_2$  (55 mL) was added a solution of sodium hydroxide (1.79 g, 44.7 mmol, 10 eq.) in methanol (25 mL). Ozone was bubbled through the solution at -78 °C for 3 h until it became blue. The solution was then purged with argon, warmed to r.t., diluted with  $\text{CH}_2\text{Cl}_2$  and washed with saturated aqueous  $\text{NH}_4\text{Cl}$  solution. Aqueous phase was back-extracted with  $\text{CH}_2\text{Cl}_2$ . Combined organic extracts were dried ( $\text{MgSO}_4$ ) and concentrated. Purification by flash chromatography ( $\text{CH}_2\text{Cl}_2/\text{acetone}$ , 9:1) afforded ester **3** (1.44 g, 67%, white solid):  $R_f$  0.37 ( $\text{CH}_2\text{Cl}_2/\text{acetone} = 9:1$ ); mp 198 °C;  $[\alpha]_{\text{D}}^{20} + 21$  ( $c$  1.0,  $\text{CH}_2\text{Cl}_2$ ); IR 1743  $\text{cm}^{-1}$ ;  $^1\text{H}$  NMR  $\delta$  7.49-7.44 (m, 2H,  $\text{H}_{\text{ar}}$ ), 7.38-7.33 (m, 3H,  $\text{H}_{\text{ar}}$ ), 5.52 (d, 1H,  $J_{\text{NH-H2'}}$  = 7.0 Hz, NH), 5.50 (s, 1H,  $\text{H}_7$ '), 4.78 (ddd, 1H,  $J_{\text{H1'-H2a}} = 9.4$  Hz,  $J_{\text{H1'-H2'}}$  = 5.7 Hz,  $J_{\text{H1'-H2b}} = 5.5$  Hz,  $\text{H}_1$ '), 4.22 (ddd, 1H,  $J_{\text{H2'-H3'}}$  = 9.7 Hz,  $J_{\text{H2'-NH}} = 7.0$  Hz,  $J_{\text{H2'-H1'}}$  = 5.7 Hz,  $\text{H}_2$ '), 4.20 (dd, 1H,  $J_{\text{H6'eq-H6'ax}} = 9.4$  Hz,  $J_{\text{H6'eq-H5'}}$  = 3.5 Hz,  $\text{H}_{6'\text{eq}}$ ), 3.81 (dd, 1H,  $J_{\text{H3'-H2'}}$  = 9.7 Hz,  $J_{\text{H3'-H4'}}$  = 8.8 Hz,  $\text{H}_3$ '), 3.70 (s, 3H,  $\text{OMe}$ ), 3.69-3.62 (m, 2H,  $\text{H}_5$ ',  $\text{H}_{6'\text{ax}}$ ), 3.53 (dd, 1H,  $J_{\text{H4'-H5'}}$  = 9.2 Hz,  $J_{\text{H4'-H3'}}$  = 8.8 Hz,  $\text{H}_4$ '), 2.73 (dd, 1H,  $J_{\text{H2a-H2b}} = 14.3$  Hz,  $J_{\text{H2a-H1'}}$  = 9.4 Hz,  $\text{H}_{2\text{a}}$ ), 2.62 (dd, 1H,  $J_{\text{H2b-H2a}} = 14.3$  Hz,  $J_{\text{H2b-H1'}}$  = 5.5 Hz,  $\text{H}_{2\text{b}}$ ), 1.97 (s, 3H,  $\text{CH}_3\text{CO}$ ), 0.83 (s, 9H,  $\text{Si}t\text{Bu}$ ), 0.05, -0.02 (2s, 6H,  $\text{SiMe}$ );  $^{13}\text{C}$  NMR  $\delta$  171.2 ( $\text{C}_1$ ), 170.3 ( $\text{CH}_3\text{CO}$ ), 137.3, 129.2, 128.3, 126.4 ( $\text{C}_{\text{ar}}$ ), 102.1 ( $\text{C}_7$ '), 83.1 ( $\text{C}_4$ '), 72.3 ( $\text{C}_1$ '), 70.4 ( $\text{C}_3$ '), 69.3 ( $\text{C}_6$ '), 64.9

(C<sub>5'</sub>), 54.9 (C<sub>2'</sub>), 52.2 (OMe), 34.0 (C<sub>2</sub>), 25.8 (Si*t*Bu), 23.4 (C(CH<sub>3</sub>)CO), 18.3 (Si*t*Bu), -3.7, -4.8 (SiMe); MS (ESI): *m/z* = 480 [M+H]<sup>+</sup> 100%; HRMS calcd for C<sub>24</sub>H<sub>37</sub>NNaO<sub>7</sub>Si<sup>+</sup> 502.2237, found 502.2226.

### (3-*N*-*tert*-Butyloxycarbonyl-2',3'-*O*-isopropylidene)-uridine **6**

To a solution of 2',3'-*O*-isopropylidene-uridine (1.50 g, 5.3 mmol) in THF (30 mL) were added at 0 °C trimethylsilyl chloride (1.35 mL, 10.6 mmol, 2 eq.) and DIEA (1.85 mL, 10.6 mmol, 2 eq.). The reaction mixture was stirred at r.t. for 1 h and hydrolyzed with saturated aqueous NH<sub>4</sub>Cl solution. Aqueous phase was extracted with EtOAc and organic phase was dried (MgSO<sub>4</sub>) and concentrated in vacuo. The residue was taken up in THF (30 mL). Di-*tert*-butyl dicarbonate (1.27 g, 5.8 mmol, 1.1 eq.), Et<sub>3</sub>N (820 μL, 5.8 mmol, 1.1 eq.) and DMAP cat. were successively added. The mixture was stirred at r.t. for 3 h, then cooled to 0 °C and stirred with 1 M aqueous HCl solution for 5 min. After dilution with EtOAc and decantation, organic phase was washed with saturated aqueous NaCl solution, dried (MgSO<sub>4</sub>) and concentrated. Purification by flash chromatography (cyclohexane/acetone, 2:1) afforded **6** (1.67 g, 82%, white solid): *R<sub>f</sub>* 0.26 (cyclohexane/acetone = 2:1); [α]<sub>D</sub><sup>20</sup> - 23 (*c* 1.0, CH<sub>2</sub>Cl<sub>2</sub>); <sup>1</sup>H NMR δ 7.48 (d, 1H, *J*<sub>H6-H5</sub> = 8.2 Hz, H<sub>6</sub>), 5.71 (d, 1H, *J*<sub>H5-H6</sub> = 8.2 Hz, H<sub>5</sub>), 5.66 (d, 1H, *J*<sub>H1'-H2'</sub> = 2.9 Hz, H<sub>1'</sub>), 4.94 (dd, 1H, *J*<sub>H2'-H3'</sub> = 6.4 Hz, *J*<sub>H2'-H1'</sub> = 2.9 Hz, H<sub>2'</sub>), 4.89 (dd, 1H, *J*<sub>H3'-H2'</sub> = 6.4 Hz, *J*<sub>H3'-H4'</sub> = 3.2 Hz, H<sub>3'</sub>), 4.29 (ddd, 1H, *J*<sub>H4'-H5'b</sub> = 3.5 Hz, *J*<sub>H4'-H3'</sub> = 3.2 Hz, *J*<sub>H4'-H5'a</sub> = 2.4 Hz, H<sub>4'</sub>), 3.90 (ddd, 1H, *J*<sub>H5'a-H5'b</sub> = 12.0 Hz, *J*<sub>H5'a-OH</sub> = 3.8 Hz, *J*<sub>H5'a-H4'</sub> = 2.4 Hz, H<sub>5'a</sub>), 3.78 (ddd, 1H, *J*<sub>H5'b-H5'a</sub> = 12.0 Hz, *J*<sub>H5'b-OH</sub> = 6.4 Hz, *J*<sub>H5'b-H4'</sub> = 3.5 Hz, H<sub>5'b</sub>), 2.81 (dd, 1H, *J*<sub>OH-H5'b</sub> = 6.4 Hz, *J*<sub>OH-H5'a</sub> = 3.8 Hz, OH), 1.58 (s, 9H, CMe<sub>3</sub>), 1.55, 1.34 (2s, 6H, CMe<sub>2</sub>); <sup>13</sup>C NMR δ 160.5 (C<sub>4</sub>), 148.7 (C<sub>2</sub>), 147.5 (CO<sub>Boc</sub>), 141.7 (C<sub>6</sub>), 114.5 (CMe<sub>2</sub>), 102.5 (C<sub>5</sub>), 95.7 (C<sub>1'</sub>), 87.4 (CMe<sub>3</sub>), 87.1 (C<sub>4'</sub>), 84.1 (C<sub>2'</sub>), 80.4 (C<sub>3'</sub>), 62.7 (C<sub>5'</sub>), 27.6 (CMe<sub>3</sub>), 27.4, 25.4 (CMe<sub>2</sub>); MS (ESI): *m/z* = 791 [2M+Na]<sup>+</sup> 100%; HRMS calcd for C<sub>17</sub>H<sub>24</sub>N<sub>2</sub>NaO<sub>8</sub><sup>+</sup> 407.1430, found 407.1431.

### Benzyl (3-*N*-*tert*-butyloxycarbonyl-2',3'-*O*-isopropylidene)-uridin-5'-yl methylphosphonate **7**

At 0 °C, diisopropyl azodicarboxylate (DIAD) (320 μL, 1.6 mmol, 1.5 eq.) was added dropwise to a solution of **5** (200 mg, 1.1 mmol, 1 eq.), **6** (413 mg, 1.1 mmol, 1 eq.) and PPh<sub>3</sub> (423 mg, 1.6 mmol, 1.5 eq.) in THF (10 mL). The reaction mixture was stirred at r.t. for 3 h then concentrated. Purification by flash chromatography (EtOAc/cyclohexane, 2:1) afforded **7** (400 mg, 67%, white solid) as a mixture of epimers (d.r. = 54/46): *R<sub>f</sub>* 0.13 (EtOAc/cyclohexane = 2:1); <sup>1</sup>H NMR δ 7.39-7.33 (m, 5H, H<sub>ar</sub>), 7.32, 7.30 (2d, 1H, *J*<sub>H6-H5</sub> = 8.1 Hz, H<sub>6</sub><sup>\*</sup>, H<sub>6</sub><sup>°</sup>), 5.70, 5.66 (2d, 1H, *J*<sub>H5-H6</sub> = 8.1 Hz, H<sub>5</sub><sup>\*</sup>, H<sub>5</sub><sup>°</sup>), 5.70-5.68 (m, 1H, H<sub>1'</sub>), 5.12-5.04 (m, 2H, CH<sub>2</sub>Ph), 4.87, 4.80 (2dd, 1H, *J*<sub>H2'-H3'</sub> = 6.4 Hz, *J*<sub>H2'-H1'</sub> = 2.2 Hz, H<sub>2'</sub><sup>°</sup>, H<sub>2'</sub><sup>\*</sup>), 4.77, 4.71 (2dd, 1H, *J*<sub>H3'-H2'</sub> = 6.4 Hz, *J*<sub>H3'-H4'</sub> = 3.7 Hz, H<sub>3'</sub><sup>°</sup>, H<sub>3'</sub><sup>\*</sup>), 4.32-4.28 (m, 1H, H<sub>4'</sub>), 4.25-4.15, 4.15-4.07 (2m, 2H, H<sub>5'</sub>), 1.59 (2s, 9H, *t*Bu<sup>°</sup>, *t*Bu<sup>\*</sup>), 1.54 (bs, 3H, CMe<sub>2</sub>), 1.48, 1.48 (2d, 3H, *J*<sub>CH<sub>3</sub>-P</sub> = 17.6 Hz, CH<sub>3</sub><sup>\*</sup>, CH<sub>3</sub><sup>°</sup>), 1.33, 1.33 (2s, 3H, CMe<sub>2</sub><sup>°</sup>, CMe<sub>2</sub><sup>\*</sup>); <sup>13</sup>C NMR δ 160.3 (C<sub>4</sub>), 148.3 (C<sub>2</sub>), 147.5 (CO<sub>Boc</sub>), 140.8, 140.7 (C<sub>6</sub><sup>\*</sup>, C<sub>6</sub><sup>°</sup>), 136.2, 136.2 (2d, *J*<sub>C<sub>qar</sub>-P</sub> = 5.0 Hz, C<sub>qar</sub><sup>\*</sup>, C<sub>qar</sub><sup>°</sup>), 128.9, 128.8, 128.1 (CH<sub>ar</sub>), 114.8 (CMe<sub>2</sub>), 102.3 (C<sub>5</sub>), 94.5, 94.4 (C<sub>1'</sub><sup>°</sup>, C<sub>1'</sub><sup>\*</sup>), 87.2 (CMe<sub>3</sub>), 85.8, 85.7 (2d, *J*<sub>C<sub>4'</sub>-P</sub> = 7.0 Hz, C<sub>4'</sub><sup>°</sup>, C<sub>4'</sub><sup>\*</sup>), 84.7, 84.6 (C<sub>2'</sub><sup>°</sup>, C<sub>2'</sub><sup>\*</sup>), 80.6, 80.5 (C<sub>3'</sub><sup>°</sup>, C<sub>3'</sub><sup>\*</sup>), 67.8, 67.7 (2d, *J*<sub>CH<sub>2</sub>Ph-P</sub> = 6.0 Hz, CH<sub>2</sub>Ph<sup>°</sup>, CH<sub>2</sub>Ph<sup>\*</sup>), 64.8, 64.7 (2d, *J*<sub>C<sub>5'</sub>-P</sub> = 6.0 Hz, C<sub>5'</sub><sup>\*</sup>, C<sub>5'</sub><sup>°</sup>), 27.6 (CMe<sub>3</sub>), 27.3, 25.5, 25.4 (CMe<sub>2</sub>), 11.5, 11.5 (2d, *J*<sub>CH<sub>3</sub>-P</sub> = 144.0 Hz, CH<sub>3</sub><sup>\*</sup>, CH<sub>3</sub><sup>°</sup>); <sup>31</sup>P NMR (202 MHz, CDCl<sub>3</sub>) δ 32.6 (s, 0.46P, P<sup>°</sup>), 32.4 (s, 0.54P, P<sup>\*</sup>); MS

(ESI):  $m/z = 1127 [2M+Na]^+$  100%; HRMS calcd for  $C_{25}H_{33}N_2NaO_{10}P^+$  575.1771, found 575.1777.

### Benzyl (*R*)-citronellyl methylphosphonate **8**

At 0 °C, DIAD (880  $\mu$ L, 4.4 mmol, 1.5 eq.) was added dropwise to a solution of **5** (550 mg, 3 mmol, 1 eq.), (*R*)-citronellol (540  $\mu$ L, 3 mmol, 1 eq.) and  $PPh_3$  (1.16 g, 4.4 mmol, 1.5 eq.) in THF (25 mL). The reaction mixture was stirred at r.t. for 1 h 30 then concentrated. Purification by flash chromatography (EtOAc/cyclohexane, 2:1) afforded **8** (920 mg, 95%, colorless oil) as a mixture of epimers (d.r. = 1/1):  $R_f$  0.44, 0.31 (EtOAc/cyclohexane, 2:1);  $^1H$  NMR  $\delta$  7.41-7.28 (m, 5H,  $H_{ar}$ ), 5.12-5.02 (m, 3H,  $CH_2Ph$ ,  $H_6$ ), 4.10-3.90 (m, 2H,  $H_1$ ), 2.04-1.87 (m, 2H,  $H_5$ ), 1.72-1.64 (m, 1H,  $H_{2a}$ ), 1.67 (s, 3H,  $H_8$ ), 1.59 (s, 3H,  $H_9$ ), 1.58-1.51 (m, 1H,  $H_3$ ), 1.48-1.39 (m, 1H,  $H_{2b}$ ), 1.46 (d, 3H,  $J_{CH_3-P} = 17.5$  Hz,  $CH_3P$ ), 1.36-1.26, 1.20-1.11 (2m, 2H,  $H_4$ ), 0.88 (2d, 3H,  $J_{H_{10}-H_3} = 6.6$  Hz,  $H_{10}$ );  $^{13}C$  NMR  $\delta$  136.7 (d,  $J_{Cq-P} = 5.7$  Hz,  $Cq$ ), 131.5 ( $C_7$ ), 128.7, 128.5, 128.0 ( $CH_{ar}$ ), 124.7 ( $C_6$ ), 67.2 (d,  $J_{CH_2Ph-P} = 5.7$  Hz,  $CH_2Ph$ ), 64.2 (d,  $J_{C_1-P} = 6.2$  Hz,  $C_1$ ), 37.5 (d,  $J_{C_2-P} = 6.3$  Hz,  $C_2$ ), 37.1 ( $C_4$ ), 29.2 ( $C_3$ ), 25.8 ( $C_8$ ), 25.5 ( $C_5$ ), 19.4 ( $C_{10}$ ), 17.8 ( $C_9$ ), 11.5, 11.5 (2d,  $J_{CH_3-P} = 144.5$  Hz,  $CH_3P$ );  $^{31}P$  NMR  $\delta$  31.5, 31.5 (2s); MS (ESI):  $m/z = 671 [2M+Na]^+$  100%; HRMS calcd for  $C_{18}H_{29}NaO_3P^+$  347.1752, found 347.1746.

### Dibenzyl 3-(2-acetamido-4,6-*O*-(*R*)-benzylidene-3-*O*-*tert*-butyldimethylsilyl)-2-deoxy- $\alpha$ -D-glucopyranosyl)-2-oxopropylphosphonate **11**

To a solution of **17** (890 mg, 3.2 mmol, 3.25 eq.) in THF (15 mL) was added dropwise *n*BuLi (1.5 mL, 3.43 mmol, 3.5 eq.) at -78 °C. After 1 h stirring at -78 °C, the mixture was added to a cold solution of **3** (475 mg, 0.99 mmol, 1 eq.) in THF (3 mL). The reaction mixture was slowly warmed to r.t. overnight and quenched with saturated aqueous  $NH_4Cl$  solution. Aqueous phase was extracted with EtOAc and combined organic layers were dried ( $MgSO_4$ ) and concentrated. Purification by flash chromatography ( $CH_2Cl_2$ /acetone, 8:2) afforded **11** (600 mg, 83%, white solid):  $R_f$  0.47 ( $CH_2Cl_2$ /acetone = 8:2);  $[\alpha]_D^{20} + 26$  ( $c$  1.0,  $CH_2Cl_2$ ); IR ( $cm^{-1}$ ) 1718 (CO), 1250 (PO);  $^1H$  NMR  $\delta$  7.51-7.47 (m, 2H,  $H_{ar}$ ), 7.42-7.30 (m, 13H,  $H_{ar}$ ), 6.62 (d, 1H,  $J_{NH-H_2'} = 8.7$  Hz, NH), 5.50 (s, 1H,  $H_{7'}$ ), 5.12, 5.02 (AB from ABX, 2H,  $J_{AB} = 11.6$  Hz,  $J_{A-P} = 9.5$  Hz,  $J_{B-P} = 10.0$  Hz,  $CH_2Ph$ ), 5.01 (d, 2H,  $J_{H-P} = 8.4$  Hz,  $CH_2Ph$ ), 4.78 (ddd, 1H,  $J_{H_1'-H_{3a}} = 8.0$  Hz,  $J_{H_1'-H_2'} = 5.7$  Hz,  $J_{H_1'-H_{3b}} = 5.1$  Hz,  $H_{1'}$ ), 4.31 (ddd, 1H,  $J_{H_2'-H_3'} = 9.8$  Hz,  $J_{H_2'-NH} = 8.7$  Hz,  $J_{H_2'-H_1'} = 5.7$  Hz,  $H_{2'}$ ), 4.15 (dd, 1H,  $J_{H_6'eq-H_6'ax} = 10.3$  Hz,  $J_{H_6'eq-H_5'} = 4.3$  Hz,  $H_{6'eq}$ ), 3.83 (dd, 1H,  $J_{H_3'-H_2'} = 9.8$  Hz,  $J_{H_3'-H_4'} = 8.3$  Hz,  $H_{3'}$ ), 3.65 (dd, 1H,  $J_{H_6'ax-H_6'eq} = 10.3$  Hz,  $J_{H_6'ax-H_5'} = 9.2$  Hz,  $H_{6'ax}$ ), 3.51 (dd, 1H,  $J_{H_4'-H_5'} = 9.6$  Hz,  $J_{H_4'-H_3'} = 8.3$  Hz,  $H_{4'}$ ), 3.47 (ddd, 1H,  $J_{H_5'-H_4'} = 9.6$  Hz,  $J_{H_5'-H_6'ax} = 9.2$  Hz,  $J_{H_5'-H_6'eq} = 4.3$  Hz,  $H_{5'}$ ), 3.19 (dd, 1H,  $J_{H_{3a}-H_{3b}} = 17.1$  Hz,  $J_{H_{3a}-H_{1'}} = 8.0$  Hz,  $H_{3a}$ ), 3.10, 3.05 (AB from ABX, 2H,  $J_{AB} = 13.5$  Hz,  $J_{A-P} = 23.2$  Hz,  $J_{B-P} = 21.9$  Hz,  $H_{1a}$ ,  $H_{1b}$ ), 2.63 (dd, 1H,  $J_{H_{3b}-H_{3a}} = 17.1$  Hz,  $J_{H_{3b}-H_{1'}} = 5.1$  Hz,  $H_{3b}$ ), 1.85 (s, 3H,  $CH_3CO$ ), 0.83 (s, 9H,  $Si^tBu$ ), 0.10, 0.01 (2s, 6H,  $SiMe$ );  $^{13}C$  NMR  $\delta$  197.4 (d,  $J_{C_2-P} = 4.7$  Hz,  $C_2$ ), 170.7 ( $CH_3CO$ ), 137.4 ( $C_{qar}$ ), 135.4, 135.3 (2d,  $J_{Cq-P} = 6.0$  Hz,  $C_{qar}$ ), 129.2, 129.1, 129.0, 129.0, 128.9, 128.5, 128.2, 128.2, 126.4 ( $CH_{ar}$ ), 102.0 ( $C_{7'}$ ), 83.4 ( $C_{4'}$ ), 70.5 ( $C_{1'}$ ), 70.1 ( $C_{3'}$ ), 69.3 ( $C_{6'}$ ), 68.6, 68.5 (2d,  $J_{CH_2Ph-P} = 6.5$  Hz,  $CH_2Ph$ ), 65.7 ( $C_{5'}$ ), 54.0 ( $C_{2'}$ ), 43.9 ( $C_3$ ), 42.9 (d,  $J_{C_1-P} = 124.8$  Hz,  $C_1$ ), 25.8 ( $Si^tBu$ ), 23.0 ( $CH_3CO$ ), 18.2 ( $Si^tBu$ ), -3.9, -4.7 ( $SiMe$ );  $^{31}P$  NMR  $\delta$  21.4 (s); MS (ESI):  $m/z = 1469 [2M+Na]^+$  100%; HRMS calcd for  $C_{38}H_{50}NNaO_9PSi^+$  746.2890, found 746.2898.

### Benzyl 3-(2-acetamido-4,6-*O*-(*R*)-benzylidene-3-*O*-*tert*-butyldimethylsilyl-2-deoxy- $\alpha$ -D-glucopyranosyl)-2-oxopropylphosphonate **12**

To a solution of **11** (600 mg, 0.83 mmol) in toluene (8 mL) was added DABCO (110 mg, 0.99 mmol, 1.2 eq.). The reaction mixture was then refluxed for 7 h and concentrated. The residue was taken up in methanol, acidified with DOWEX H<sup>+</sup> (50WX8-100) ion exchange resin. Methanol was removed in vacuo to afford **12** (475 mg, 90%, white solid):  $[\alpha]_D^{20} + 18$  (*c* 1.0, CH<sub>2</sub>Cl<sub>2</sub>); <sup>1</sup>H NMR (acetone-d<sub>6</sub>)  $\delta$  7.54-7.32 (m, 11H, NH, H<sub>ar</sub>), 5.62 (s, 1H, H<sub>7'</sub>), 5.18-5.08 (m, 2H, CH<sub>2</sub>Ph), 4.66 (ddd, 1H,  $J_{H1'-H3a} = 6.8$  Hz,  $J_{H1'-H3b} = 6.3$  Hz,  $J_{H1'-H2'} = 5.9$  Hz, H<sub>1'</sub>), 4.28 (ddd, 1H,  $J_{H2'-H3'} = 10.0$  Hz,  $J_{H2'-NH} = 9.4$  Hz,  $J_{H2'-H1'} = 5.9$  Hz, H<sub>2'</sub>), 4.09 (dd, 1H,  $J_{H6'eq-H6'ax} = 9.7$  Hz,  $J_{H6'eq-H5'} = 4.5$  Hz, H<sub>6'eq</sub>), 3.99 (dd, 1H,  $J_{H3'-H2'} = 10.0$  Hz,  $J_{H3'-H4'} = 8.9$  Hz, H<sub>3'</sub>), 3.68 (dd, 1H,  $J_{H6'ax-H5'} = J_{H6'ax-H6'eq} = 9.7$  Hz, H<sub>6'ax</sub>), 3.62 (ddd, 1H,  $J_{H5'-H6'ax} = 9.7$  Hz,  $J_{H5'-H4'} = 9.2$  Hz,  $J_{H5'-H6'eq} = 4.5$  Hz, H<sub>5'</sub>), 3.52 (dd, 1H,  $J_{H4'-H5'} = 9.2$  Hz,  $J_{H4'-H3'} = 8.9$  Hz, H<sub>4'</sub>), 3.37 (dd, 1H,  $J_{H1a-P} = 22.8$  Hz,  $J_{H1a-H1b} = 13.4$  Hz, H<sub>1a</sub>), 3.35 (dd, 1H,  $J_{H3a-H3b} = 17.1$  Hz,  $J_{H3a-H1'} = 6.8$  Hz, H<sub>3a</sub>), 3.24 (dd, 1H,  $J_{H1b-P} = 21.9$  Hz,  $J_{H1b-H1a} = 13.4$  Hz, H<sub>1b</sub>), 3.00 (dd, 1H,  $J_{H3b-H3a} = 17.1$  Hz,  $J_{H3b-H1'} = 6.3$  Hz, H<sub>3b</sub>), 1.84 (s, 3H, CH<sub>3</sub>CO), 0.82 (s, 9H, Si*t*Bu), 0.08, 0.00 (2s, 6H, SiMe); <sup>13</sup>C NMR (acetone-d<sub>6</sub>)  $\delta$  199.9 (d,  $J_{C2-P} = 5.0$  Hz, C<sub>2</sub>), 170.5 (CH<sub>3</sub>CO), 139.0 (C<sub>qar</sub>), 137.6 (d,  $J_{Cq-P} = 6.0$  Hz, C<sub>qar</sub>), 129.6, 129.4, 129.3, 129.1, 128.7, 128.7, 127.3 (CH<sub>ar</sub>), 102.5 (C<sub>7'</sub>), 84.4 (C<sub>4'</sub>), 72.0 (C<sub>1'</sub>), 71.0 (C<sub>3'</sub>), 69.7 (C<sub>6'</sub>), 68.0 (d,  $J_{CH2Ph-P} = 5.0$  Hz, CH<sub>2</sub>Ph), 65.9 (C<sub>5'</sub>), 54.6 (C<sub>2'</sub>), 43.8 (d,  $J_{C1-P} = 124.0$  Hz, C<sub>1</sub>), 43.5 (C<sub>3</sub>), 26.3 (Si*t*Bu), 23.1 (CH<sub>3</sub>CO), 18.8 (Si*t*Bu), -3.8, -4.5 (SiMe); <sup>31</sup>P NMR (acetone-d<sub>6</sub>)  $\delta$  18.8 (s); MS (ESI): *m/z* = 632 [M-H]<sup>-</sup> 100%; HRMS calcd for C<sub>31</sub>H<sub>43</sub>NO<sub>9</sub>PSi<sup>-</sup> 632.2445, found 632.2460.

### Dibenzyl 3-(2-acetamido-2-deoxy- $\alpha$ -D-glucopyranosyl)-2-oxopropylphosphonate **13**

To a suspension of **11** (100 mg, 0.14 mmol) in water (5 mL) was added trifluoroacetic acid (5 mL) at 0 °C. The reaction mixture was stirred at r.t. for 1 h and concentrated. Purification by flash chromatography (CH<sub>2</sub>Cl<sub>2</sub>/MeOH, 85:15) and lyophilization afforded **13** (70 mg, 97%, white solid): *R<sub>f</sub>* 0.48 (CH<sub>2</sub>Cl<sub>2</sub>/MeOH = 85:15);  $[\alpha]_D^{20} + 38$  (*c* 1.0, CH<sub>2</sub>Cl<sub>2</sub>); <sup>1</sup>H NMR (DMSO-d<sub>6</sub>)  $\delta$  7.67 (d, 1H,  $J_{NH-H2'} = 7.8$  Hz, NH), 7.41-7.31 (m, 10H, H<sub>ar</sub>), 5.07-4.98 (m, 5H, OH<sub>4'</sub>, CH<sub>2</sub>Ph), 4.88 (d, 1H,  $J_{OH3'-H3'} = 5.3$  Hz, OH<sub>3'</sub>), 4.44 (dd, 1H,  $J_{OH6'-H6'b} = 6.0$  Hz,  $J_{OH6'-H6'a} = 5.8$  Hz, OH<sub>6'</sub>), 4.40 (ddd, 1H,  $J_{H1'-H3a} = 9.1$  Hz,  $J_{H1'-H2'} = 5.6$  Hz,  $J_{H1'-H3b} = 4.6$  Hz, H<sub>1'</sub>), 3.71 (ddd, 1H,  $J_{H2'-H3'} = 10.0$  Hz,  $J_{H2'-NH} = 7.8$  Hz,  $J_{H2'-H1'} = 5.6$  Hz, H<sub>2'</sub>), 3.56 (ddd, 1H,  $J_{H6'a-H6'b} = 11.6$  Hz,  $J_{H6'a-OH6'} = 5.8$  Hz,  $J_{H6'a-H5'} = 2.5$  Hz, H<sub>6'a</sub>), 3.50 (dd, 1H,  $J_{H1a-P} = 21.8$  Hz,  $J_{H1a-H1b} = 14.4$  Hz, H<sub>1a</sub>), 3.47 (dd, 1H, (ddd, 1H,  $J_{H6'b-H6'a} = 11.6$  Hz,  $J_{H6'b-OH6'} = 6.0$  Hz,  $J_{H6'b-H5'} = 5.7$  Hz, H<sub>6'b</sub>), 3.41 (dd, 1H,  $J_{H1b-P} = 21.5$  Hz,  $J_{H1b-H1a} = 14.4$  Hz, H<sub>1b</sub>), 3.40 (ddd, 1H,  $J_{H3'-H2'} = 10.0$  Hz,  $J_{H3'-H4'} = 8.0$  Hz,  $J_{H3'-OH3'} = 5.3$  Hz, H<sub>3'</sub>), 3.35 (ddd, 1H,  $J_{H5'-H4'} = 8.8$  Hz,  $J_{H5'-H6'b} = 5.7$  Hz,  $J_{H5'-H6'a} = 2.5$  Hz, H<sub>5'</sub>), 3.15 (ddd, 1H,  $J_{H4'-H5'} = 8.8$  Hz,  $J_{H4'-H3'} = 8.0$  Hz,  $J_{H4'-OH4'} = 5.3$  Hz, H<sub>4'</sub>), 2.90 (dd, 1H,  $J_{H3a-H3b} = 16.1$  Hz,  $J_{H3a-H1'} = 9.1$  Hz, H<sub>3a</sub>), 2.66 (dd, 1H,  $J_{H3b-H3a} = 16.1$  Hz,  $J_{H3b-H1'} = 4.6$  Hz, H<sub>3b</sub>), 1.77 (s, 3H, CH<sub>3</sub>CO); <sup>13</sup>C NMR (DMSO-d<sub>6</sub>)  $\delta$  200.5 (d,  $J_{C2-P} = 6.0$  Hz, C<sub>2</sub>), 169.3 (CH<sub>3</sub>CO), 136.2 (d,  $J_{Cq-P} = 6.0$  Hz, C<sub>qar</sub>), 128.4, 128.2, 127.7 (CH<sub>ar</sub>), 74.9 (C<sub>5'</sub>), 70.6 (C<sub>4'</sub>), 70.3 (C<sub>3'</sub>), 69.3 (C<sub>1'</sub>), 67.0, 66.9 (2d,  $J_{CH2Ph-P} = 6.0$  Hz, CH<sub>2</sub>Ph), 60.9 (C<sub>6'</sub>), 52.6 (C<sub>2'</sub>), 41.8 (d,  $J_{C1-P} = 126.0$  Hz, C<sub>1</sub>), 41.4 (C<sub>3</sub>), 22.6 (CH<sub>3</sub>CO); <sup>31</sup>P NMR (DMSO-d<sub>6</sub>)  $\delta$  21.8 (s); MS (ESI): *m/z* = 544 [M+Na]<sup>+</sup> 100%; HRMS calcd for C<sub>25</sub>H<sub>32</sub>NNaO<sub>9</sub>P<sup>+</sup> 544.1712, found 544.1707.

### Benzyl 3-(2-acetamido-2-deoxy- $\alpha$ -D-glucopyranosyl)-2-oxopropylphosphonate **14**

To a solution of **13** (34 mg, 65  $\mu\text{mol}$ ) in toluene (1 mL) was added DABCO (9 mg, 78  $\mu\text{mol}$ , 1.2 eq.). The reaction mixture was then refluxed for 4 h and concentrated. The residue was taken up in water, acidified with DOWEX H<sup>+</sup> (50WX8-100) ion exchange resin. Water was removed in vacuo to afford **14** (25 mg, 88%, white solid): <sup>1</sup>H NMR (DMSO-d<sub>6</sub>)  $\delta$  7.73 (d, 1H,  $J_{\text{NH-H2}'} = 8.0$  Hz, NH), 7.42-7.28 (m, 5H, H<sub>ar</sub>), 4.94 (d, 2H,  $J_{\text{CH2Ph-P}} = 7.5$  Hz, CH<sub>2</sub>Ph), 4.66 (ddd, 1H,  $J_{\text{H1}'-H3a} = 8.3$  Hz,  $J_{\text{H1}'-H3b} = J_{\text{H1}'-H2'} = 5.2$  Hz, H<sub>1'</sub>), 3.72 (ddd, 1H,  $J_{\text{H2}'-H3'} = 10.3$  Hz,  $J_{\text{H2}'-NH} = 8.0$  Hz,  $J_{\text{H2}'-H1'} = 5.2$  Hz, H<sub>2'</sub>), 3.56 (dd, 1H,  $J_{\text{H6}'a-H6'b} = 11.5$  Hz,  $J_{\text{H6}'a-H5'} = 2.2$  Hz, H<sub>6'a</sub>), 3.46 (dd, 1H,  $J_{\text{H6}'b-H6'a} = 11.5$  Hz,  $J_{\text{H6}'b-H5'} = 5.7$  Hz, H<sub>6'b</sub>), 3.41 (dd, 1H,  $J_{\text{H3}'-H2'} = 10.3$  Hz,  $J_{\text{H3}'-H4'} = 8.1$  Hz, H<sub>3'</sub>), 3.35 (ddd, 1H,  $J_{\text{H5}'-H4'} = 8.8$  Hz,  $J_{\text{H5}'-H6'b} = 5.7$  Hz,  $J_{\text{H5}'-H6'a} = 2.2$  Hz, H<sub>5'</sub>), 3.17, 3.12 (AB from ABX, 2H,  $J_{\text{AB}} = 13.3$  Hz,  $J_{\text{A-P}} = 21.7$  Hz,  $J_{\text{B-P}} = 22.0$  Hz, H<sub>1</sub>), 3.12 (dd, 1H,  $J_{\text{H4}'-H5'} = 8.8$  Hz,  $J_{\text{H4}'-H3'} = 8.1$  Hz, H<sub>4'</sub>), 2.88 (dd, 1H,  $J_{\text{H3a-H3b}} = 16.2$  Hz,  $J_{\text{H3a-H1}'} = 8.3$  Hz, H<sub>3a</sub>), 2.75 (dd, 1H,  $J_{\text{H3b-H3a}} = 16.2$  Hz,  $J_{\text{H3b-H1}'} = 5.2$  Hz, H<sub>3b</sub>), 1.76 (s, 3H, CH<sub>3</sub>CO); <sup>13</sup>C NMR (DMSO-d<sub>6</sub>)  $\delta$  201.5 (d,  $J_{\text{C2-P}} = 5.5$  Hz, C<sub>2</sub>), 169.3 (CH<sub>3</sub>C=O), 137.2 (d,  $J_{\text{Cq-P}} = 7.0$  Hz, C<sub>qar</sub>), 128.3, 127.8, 127.4 (CH<sub>ar</sub>), 74.8 (C<sub>5'</sub>), 70.8 (C<sub>4'</sub>), 70.4 (C<sub>3'</sub>), 69.5 (C<sub>1'</sub>), 66.1 (d,  $J_{\text{CH2Ph-P}} = 5.0$  Hz, CH<sub>2</sub>Ph), 61.0 (C<sub>6'</sub>), 52.7 (C<sub>2'</sub>), 43.9 (d,  $J_{\text{C1-P}} = 120.0$  Hz, C<sub>1</sub>), 41.1 (C<sub>3</sub>), 22.6 (CH<sub>3</sub>CO); <sup>31</sup>P NMR (DMSO-d<sub>6</sub>)  $\delta$  16.2 (s); MS (ESI):  $m/z = 430$  [M-H]<sup>-</sup> 100%.

### 3-*N*-*tert*-Butyloxycarbonyl-1-(5'-hydroxypentyl)-uracil **17**

To a solution of 1-(5'-hydroxypentyl)uracil (500 mg, 2.5 mmol) in THF (10 mL) were added at 0 °C trimethylsilyl chloride (650  $\mu\text{L}$ , 5.0 mmol, 2 eq.) and DIEA (880  $\mu\text{L}$ , 5.0 mmol, 2 eq.). The reaction mixture was stirred at r.t. for 1 h 30 and hydrolyzed with saturated aqueous NH<sub>4</sub>Cl solution. Aqueous phase was extracted with EtOAc and the organic layer was dried (MgSO<sub>4</sub>) and concentrated in vacuo. The residue was taken up in THF (10 mL). Boc<sub>2</sub>O (606 mg, 2.8 mmol, 1.1 eq.), Et<sub>3</sub>N (390  $\mu\text{L}$ , 2.8 mmol, 1.1 eq.) and DMAP cat. were successively added. The mixture was stirred at r.t. for 16 h, then cooled to 0 °C and stirred with 1 M aqueous HCl solution for 2 min. After dilution with EtOAc and decantation, organic phase was washed with saturated aqueous NaCl solution, dried (MgSO<sub>4</sub>) and concentrated. Purification by flash chromatography (CH<sub>2</sub>Cl<sub>2</sub>/MeOH, 9:1) afforded **17** (498 mg, 66%, yellow oil):  $R_f$  0.54 (CH<sub>2</sub>Cl<sub>2</sub>/MeOH, 9:1); <sup>1</sup>H NMR  $\delta$  7.12 (d, 1H,  $J_{\text{H6-H5}} = 8.0$  Hz, H<sub>6</sub>), 5.70 (d, 1H,  $J_{\text{H5-H6}} = 8.0$  Hz, H<sub>5</sub>), 3.73 (t, 2H,  $J_{\text{H1}'-H2'} = 7.4$  Hz, H<sub>1'</sub>), 3.68-3.61 (m, 2H, H<sub>5'</sub>), 1.74 (tt, 2H,  $J_{\text{H2}'-H3'} = 7.7$  Hz,  $J_{\text{H2}'-H1'} = 7.4$  Hz, H<sub>2'</sub>), 1.65-1.56 (m, 2H, H<sub>4'</sub>), 1.60 (s, 9H, CMe<sub>3</sub>), 1.47-1.39 (m, 2H, H<sub>3'</sub>); <sup>13</sup>C NMR  $\delta$  160.9 (C<sub>4</sub>), 149.2 (C<sub>2</sub>), 148.0 (CO<sub>Boc</sub>), 143.7 (C<sub>6</sub>), 102.0 (C<sub>5</sub>), 86.9 (CMe<sub>3</sub>), 62.5 (C<sub>5'</sub>), 49.4 (C<sub>1'</sub>), 32.1 (C<sub>4'</sub>), 28.8 (C<sub>2'</sub>), 27.6 (CMe<sub>3</sub>), 22.9 (C<sub>3'</sub>); MS (ESI):  $m/z = 321$  [M+Na]<sup>+</sup> 100%; HRMS calcd for C<sub>14</sub>H<sub>22</sub>N<sub>2</sub>NaO<sub>5</sub><sup>+</sup> 321.1426, found 321.1425.

### 3. $^1\text{H}$ , $^{13}\text{C}$ and $^{31}\text{P}$ NMR Spectra

Compound **2a** ( $^1\text{H}$ ,  $^{13}\text{C}$ )

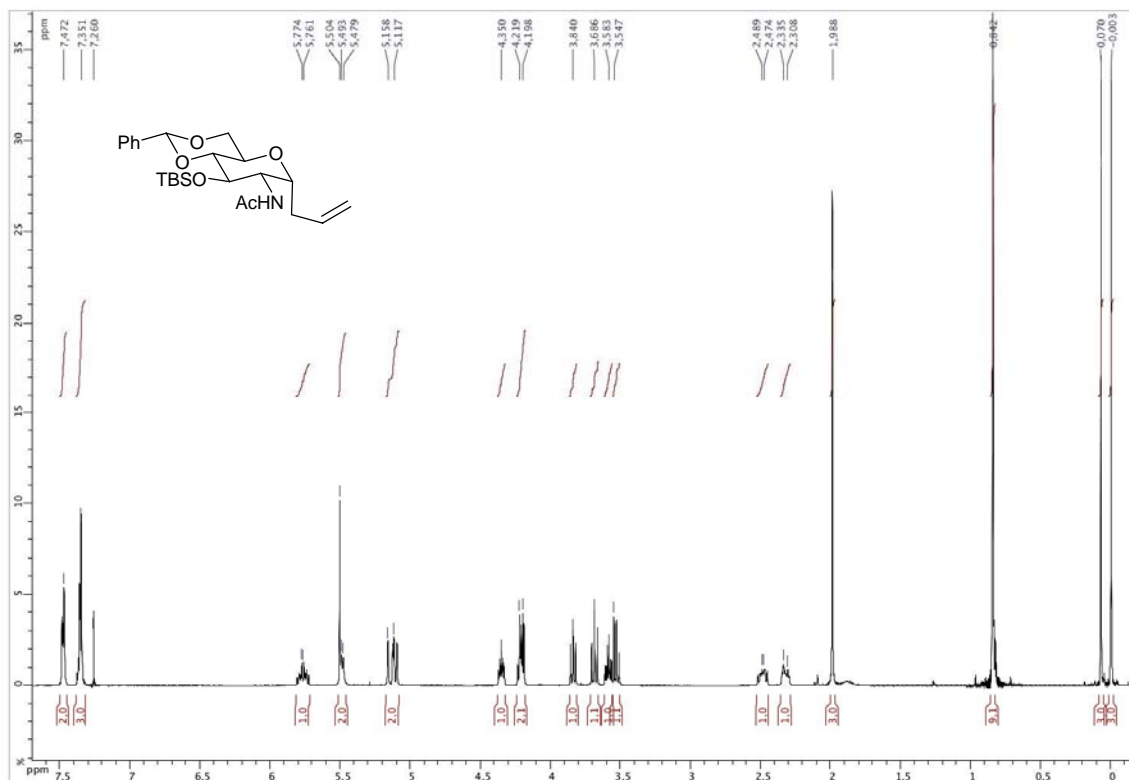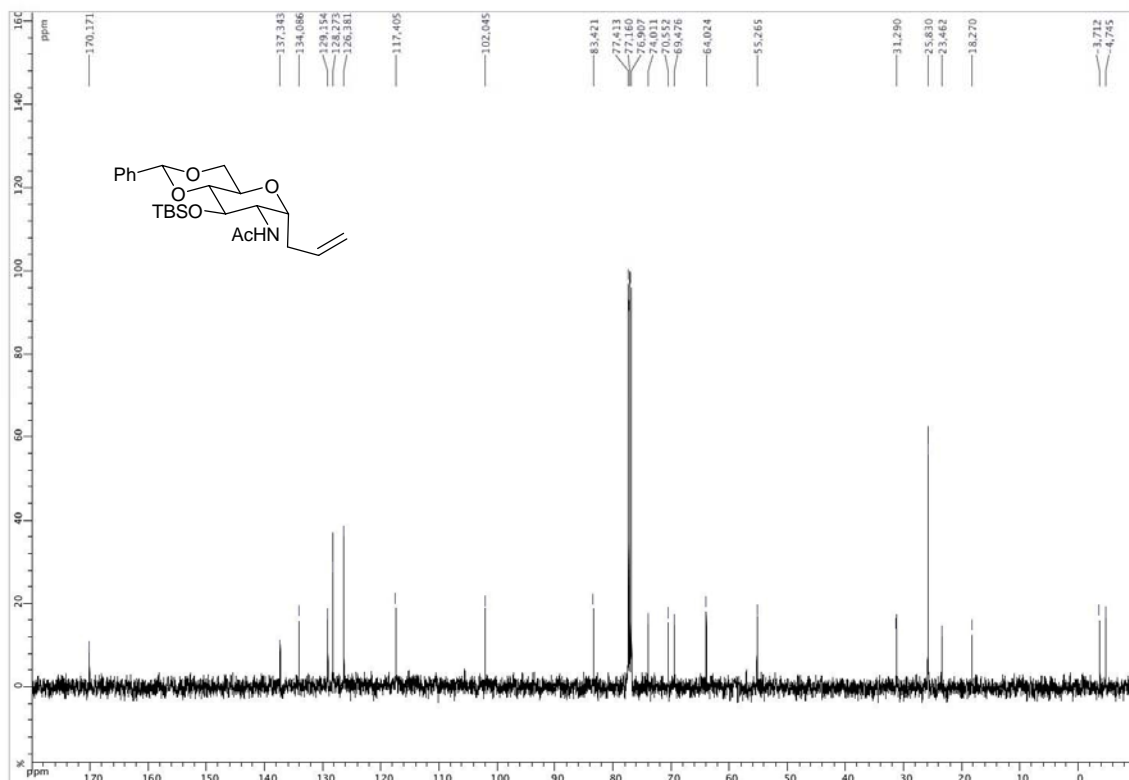

### Compound 3 ( $^1\text{H}$ , $^{13}\text{C}$ )

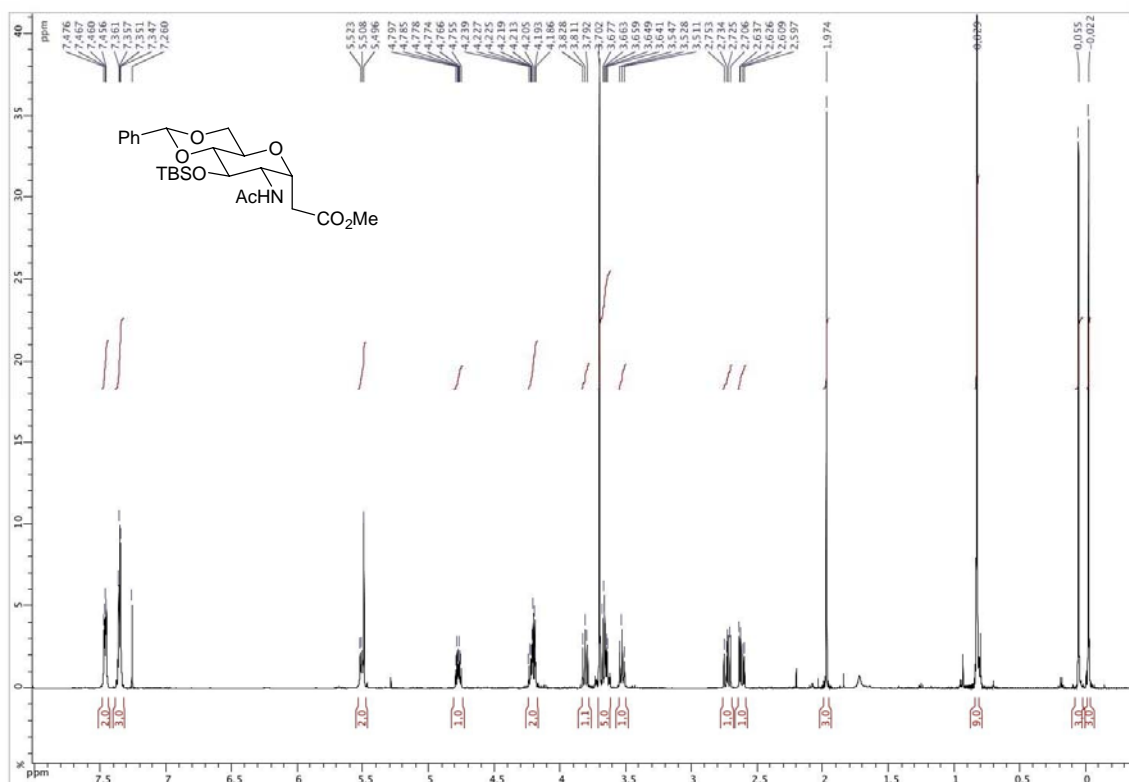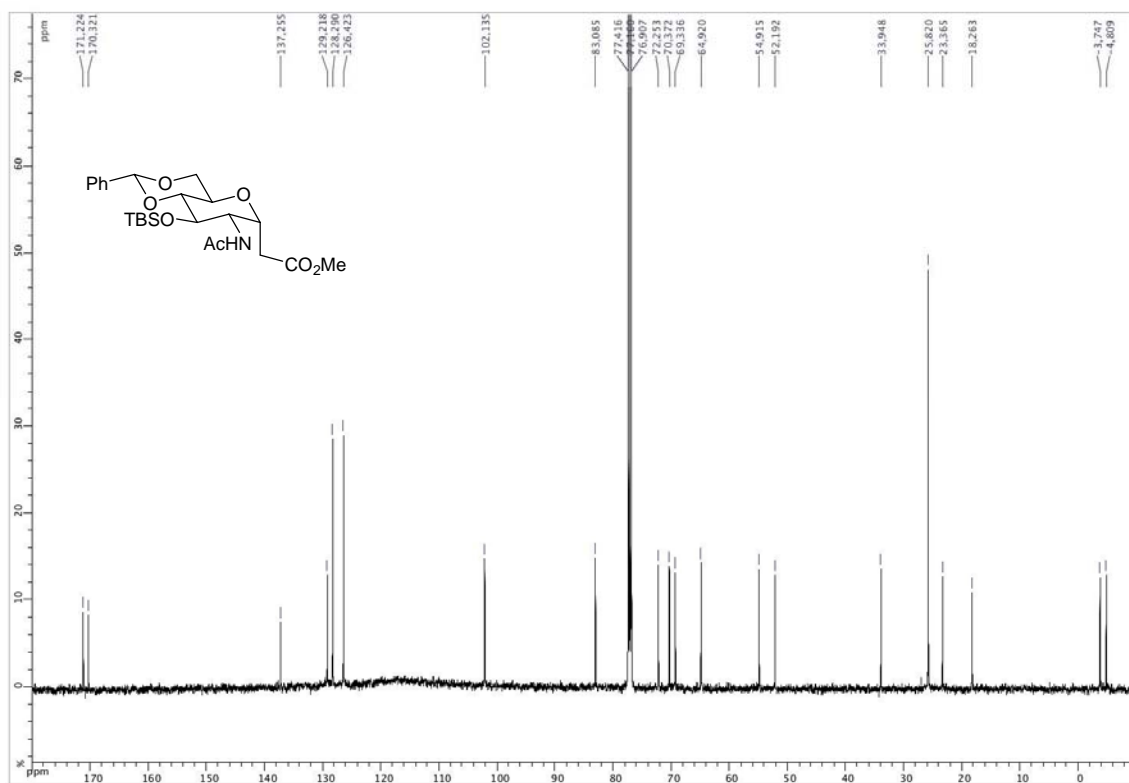



Compound 6 ( $^1\text{H}$ ,  $^{13}\text{C}$ )

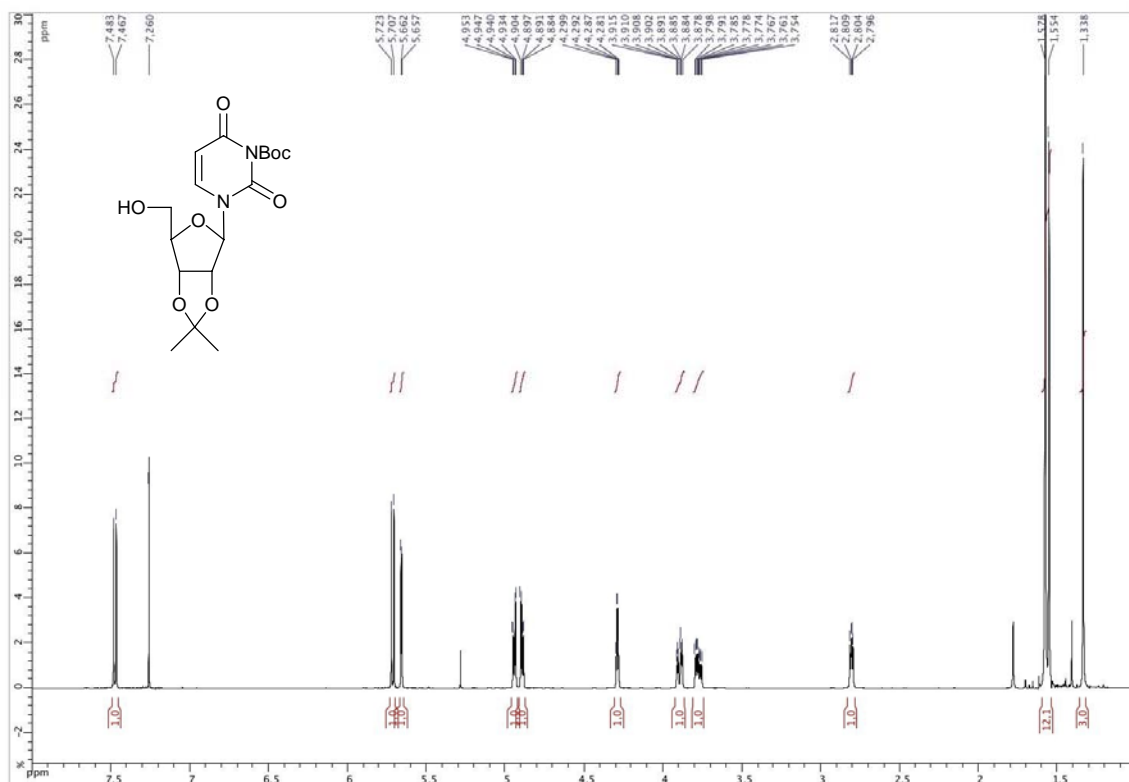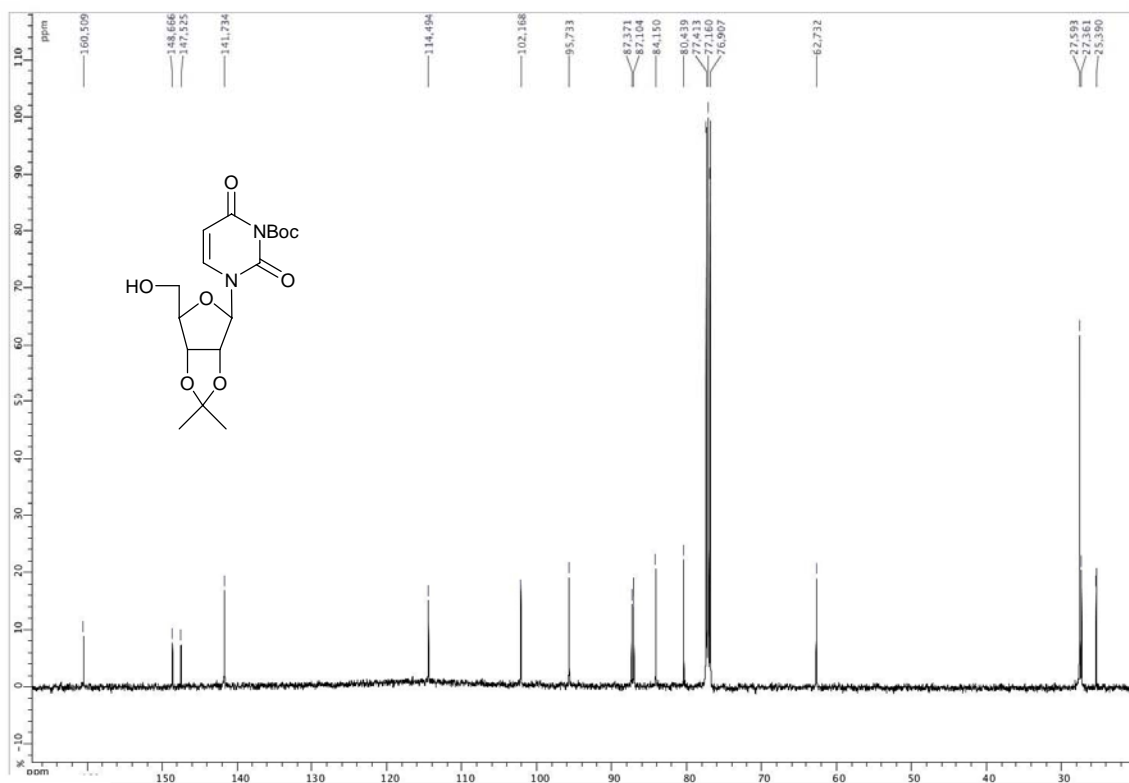

Compound **7** ( $^1\text{H}$ ,  $^{13}\text{C}$ ,  $^{31}\text{P}$ )

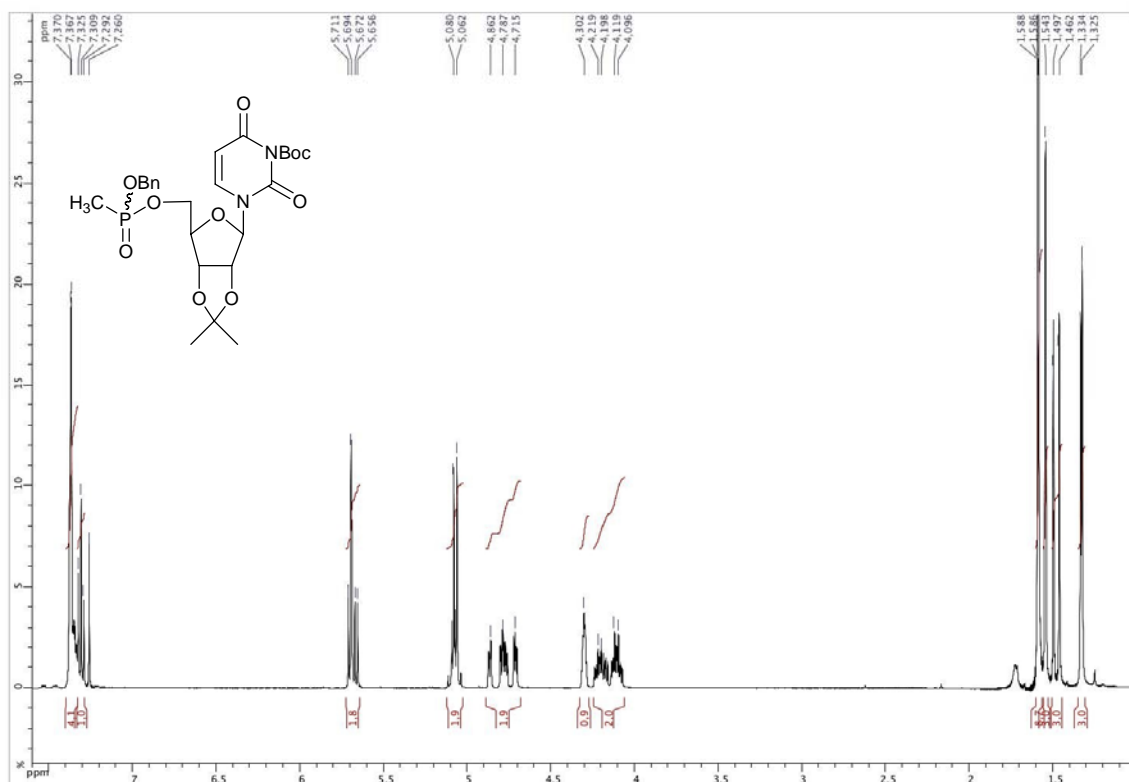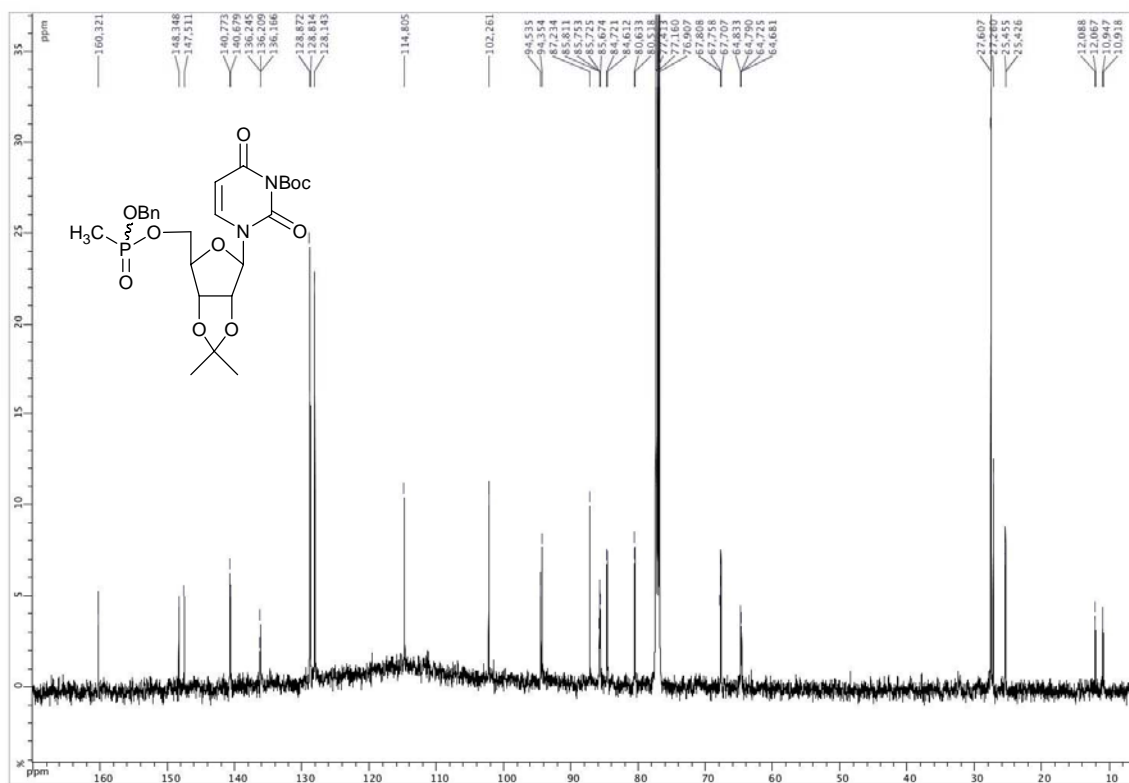

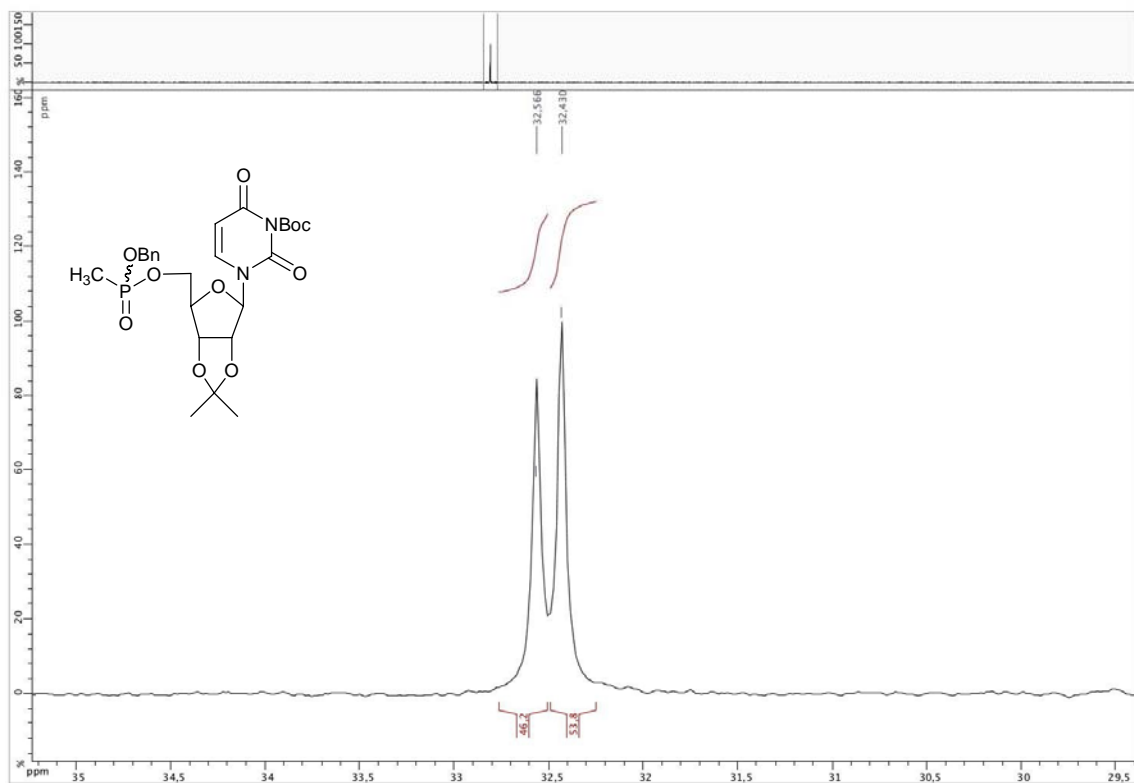

Compound 8 ( $^1\text{H}$ ,  $^{13}\text{C}$ ,  $^{31}\text{P}$ )

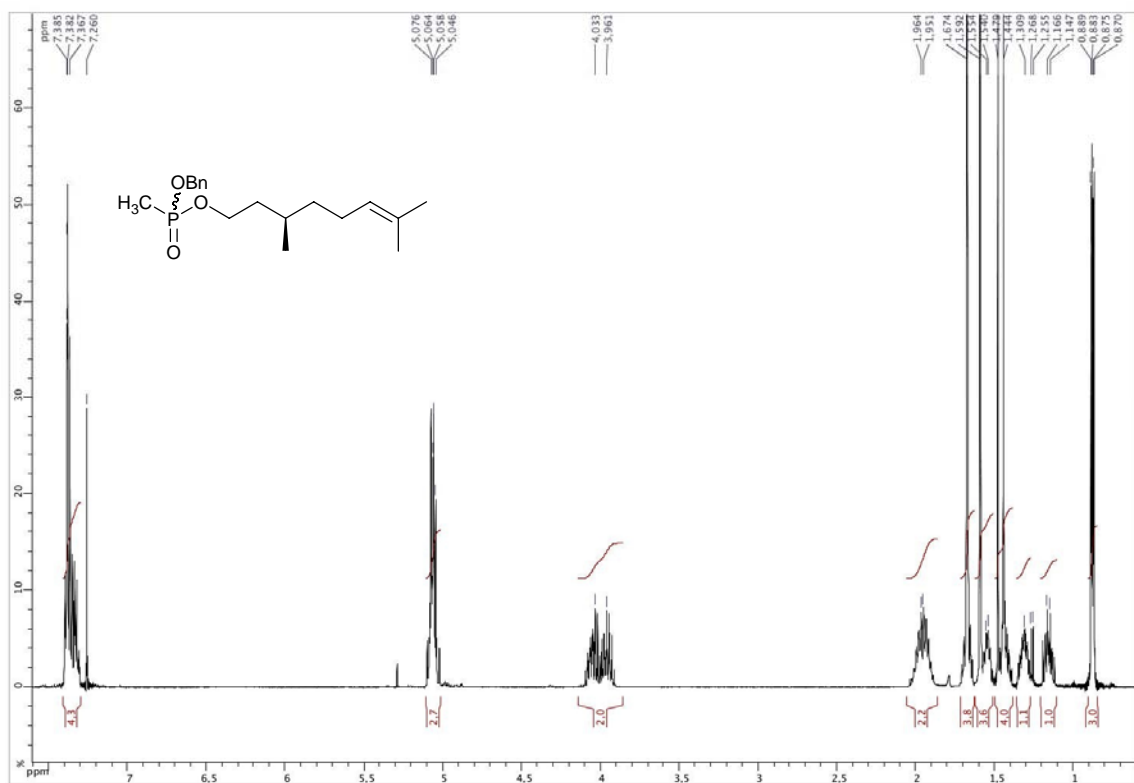

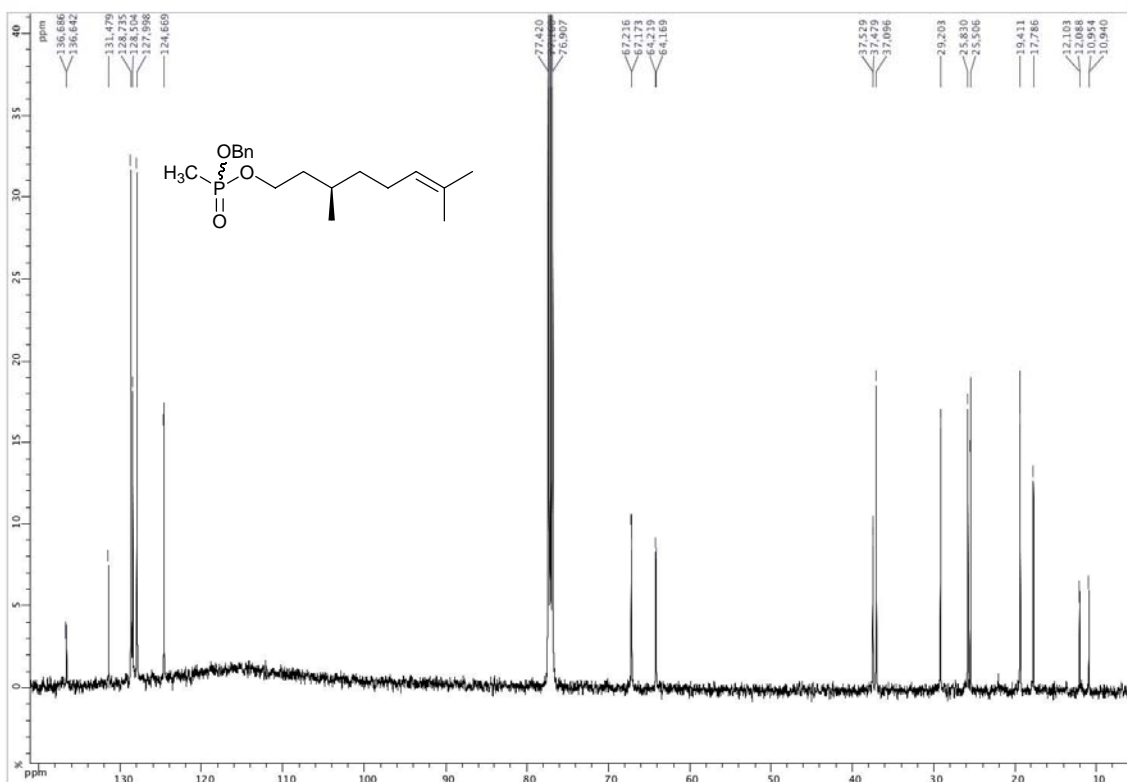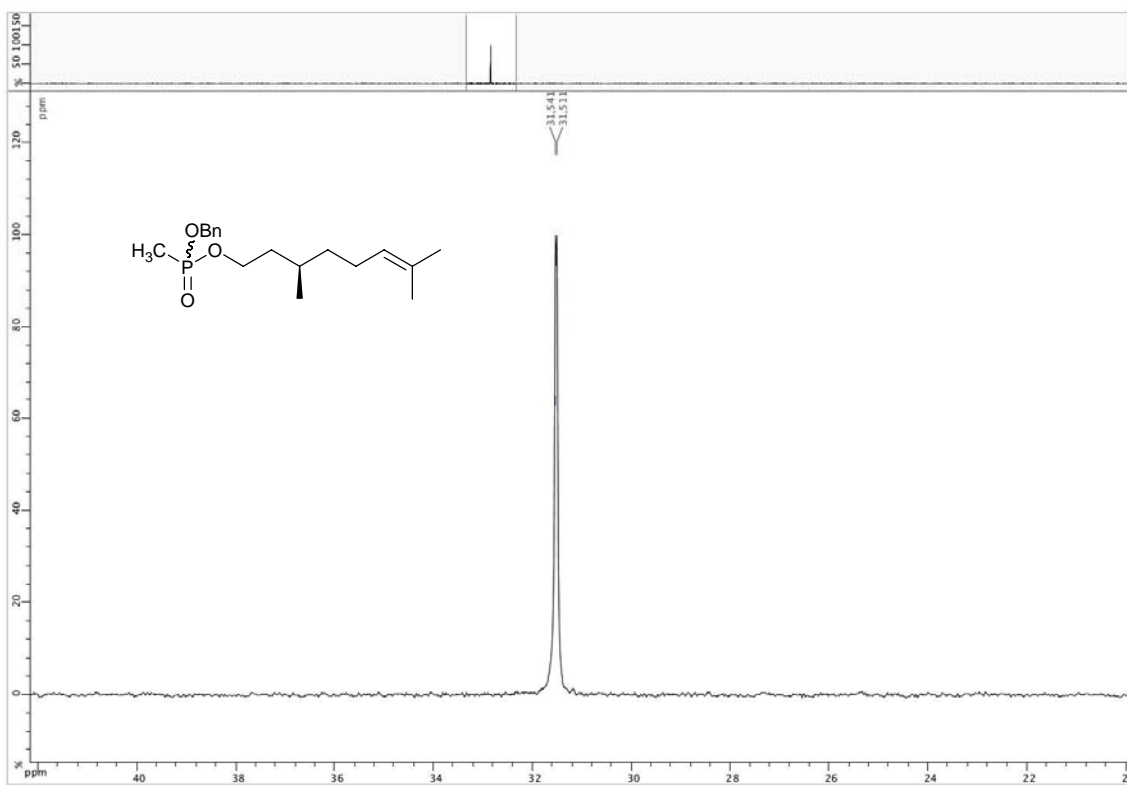

### Compound **9** ( $^1\text{H}$ , $^{13}\text{C}$ , $^{31}\text{P}$ )

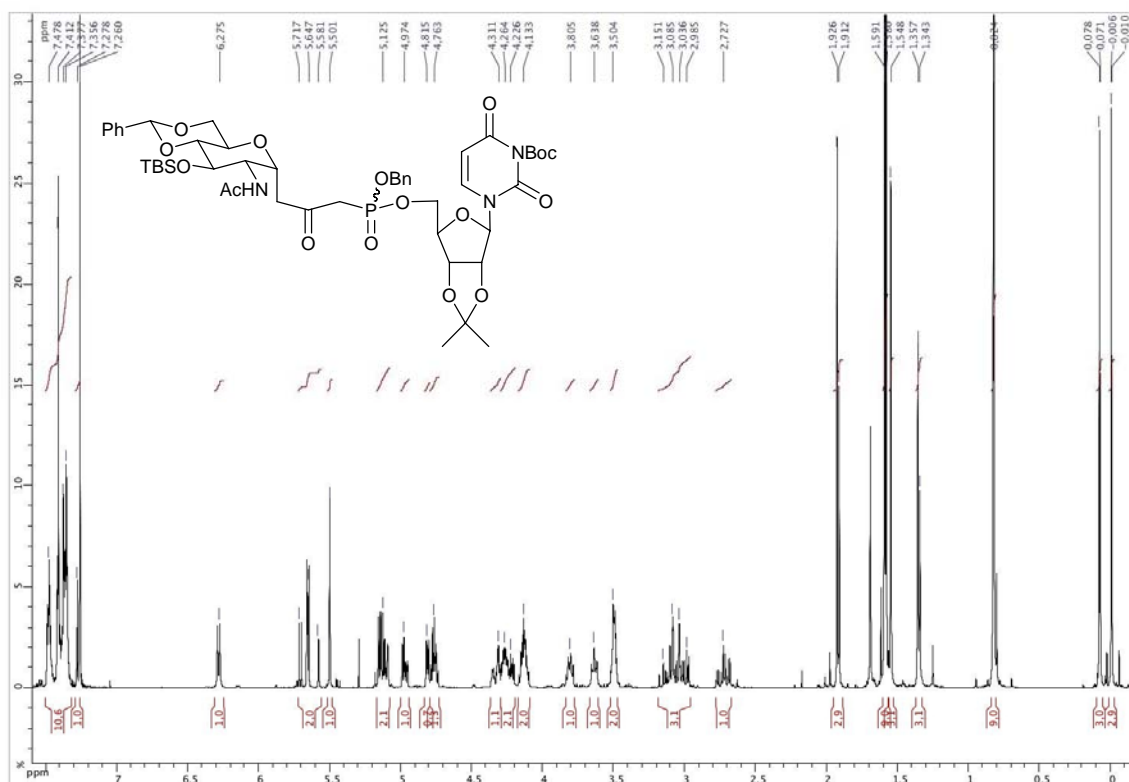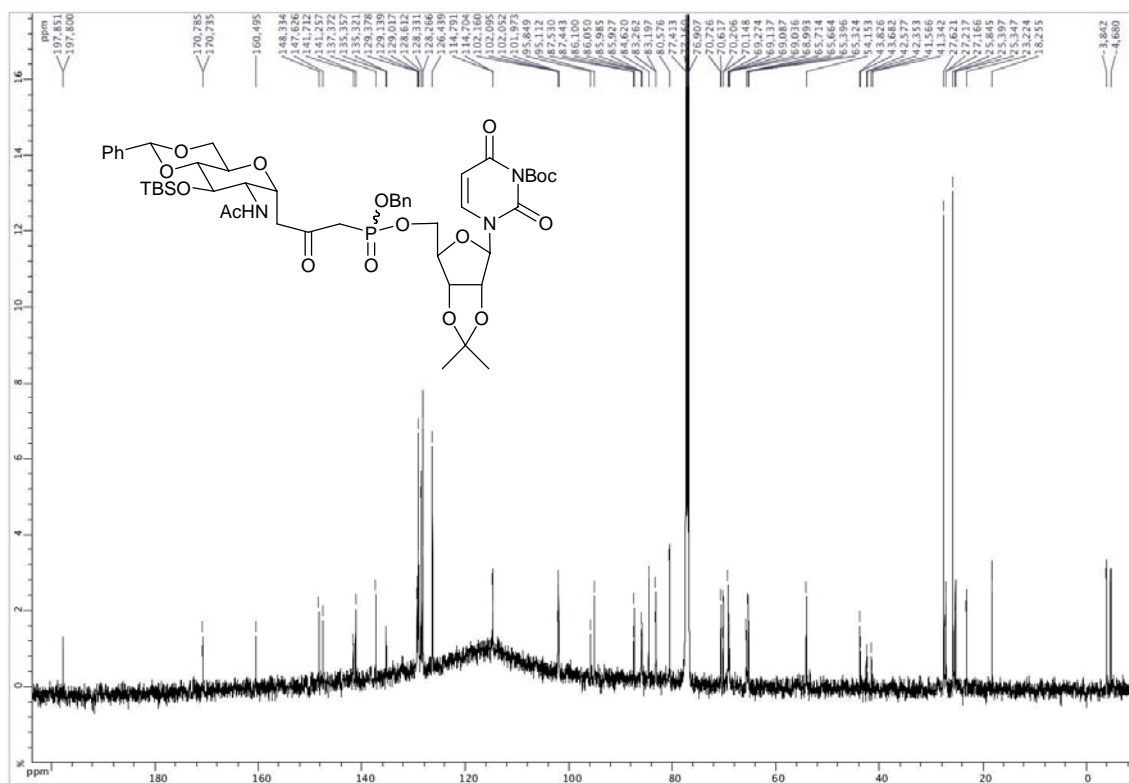

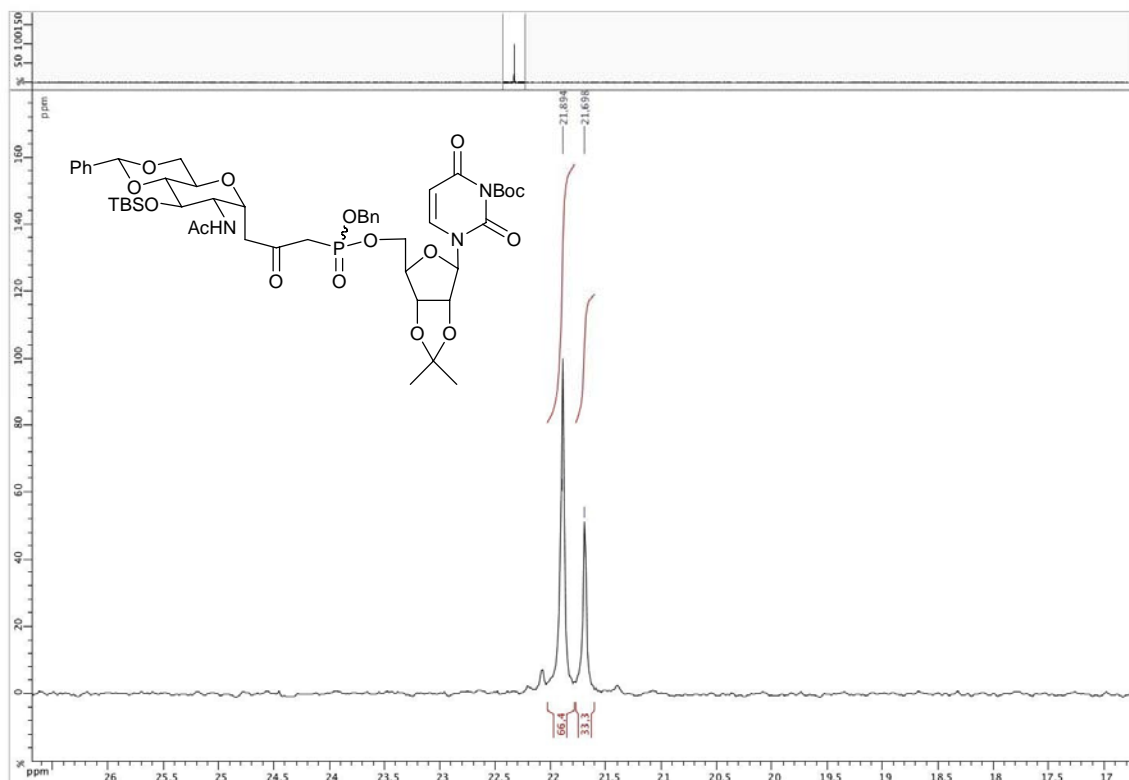

Compound 10 ( $^1\text{H}$ ,  $^{13}\text{C}$ ,  $^{31}\text{P}$ )

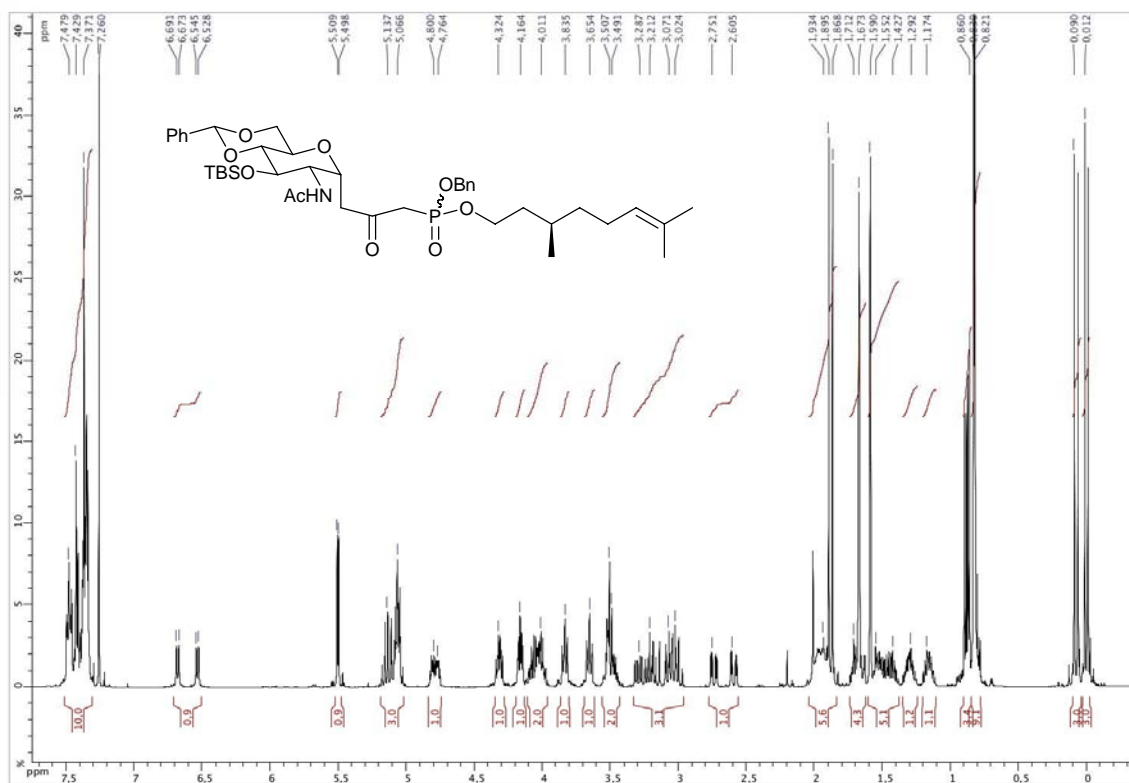

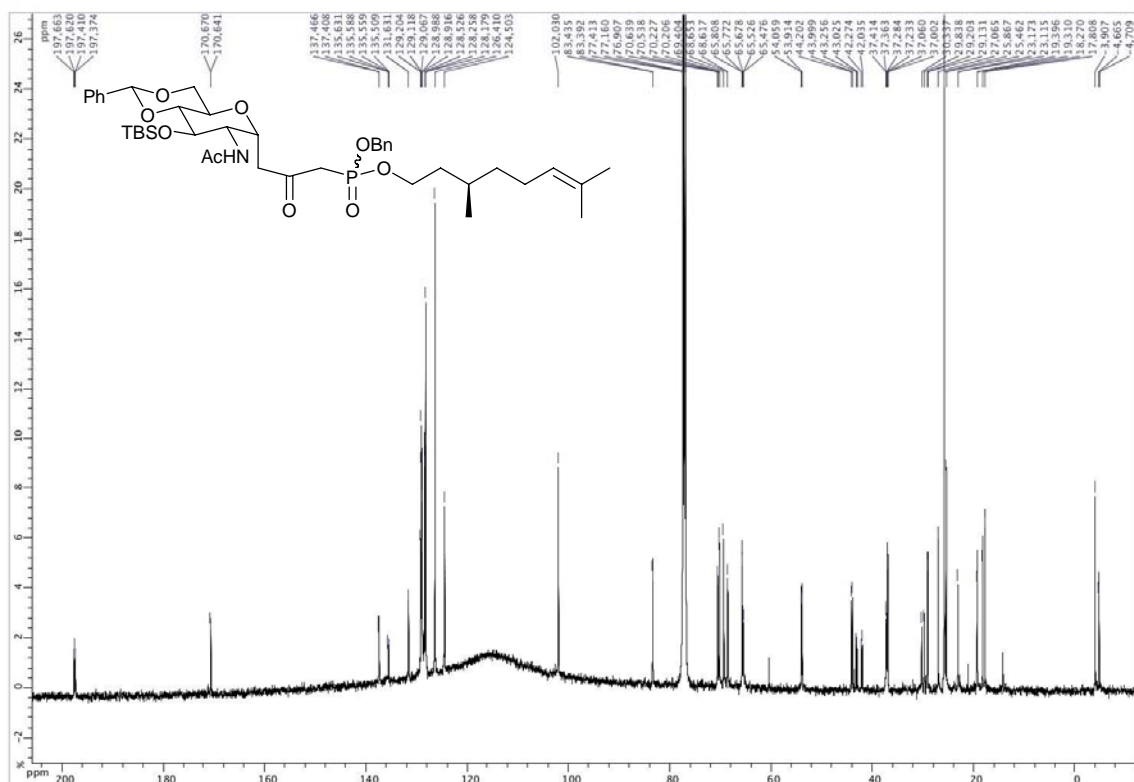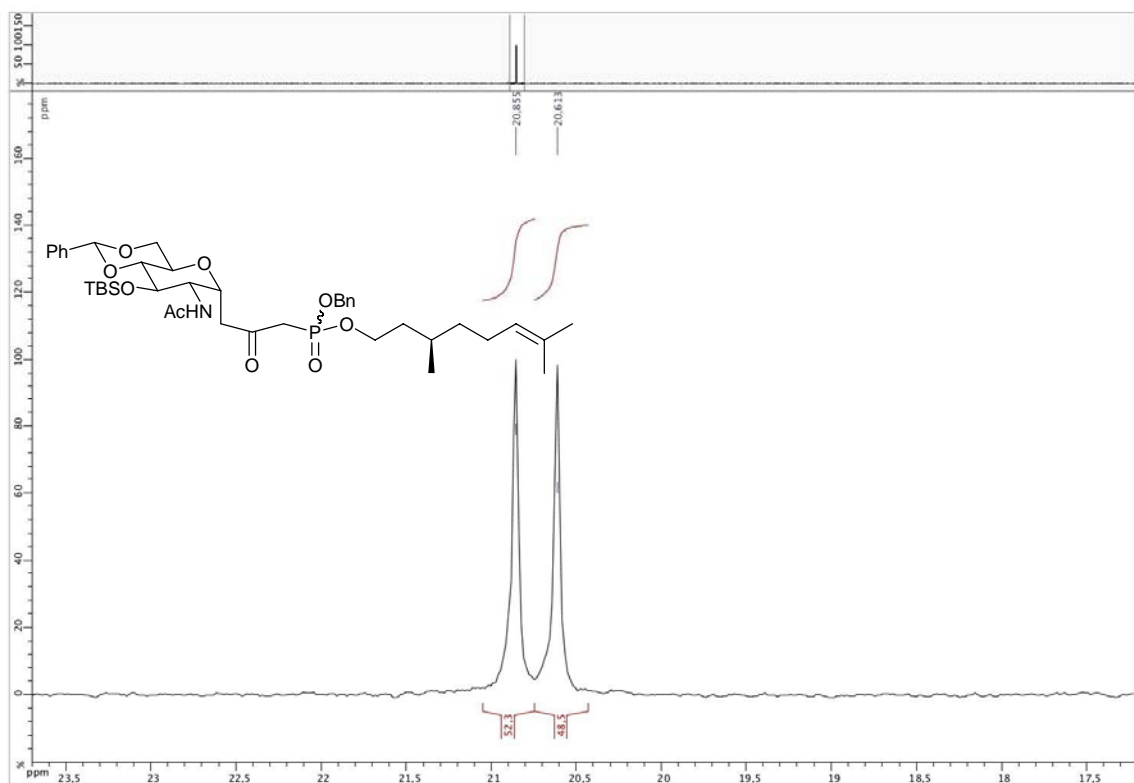

Compound **11** ( $^1\text{H}$ ,  $^{13}\text{C}$ ,  $^{31}\text{P}$ )

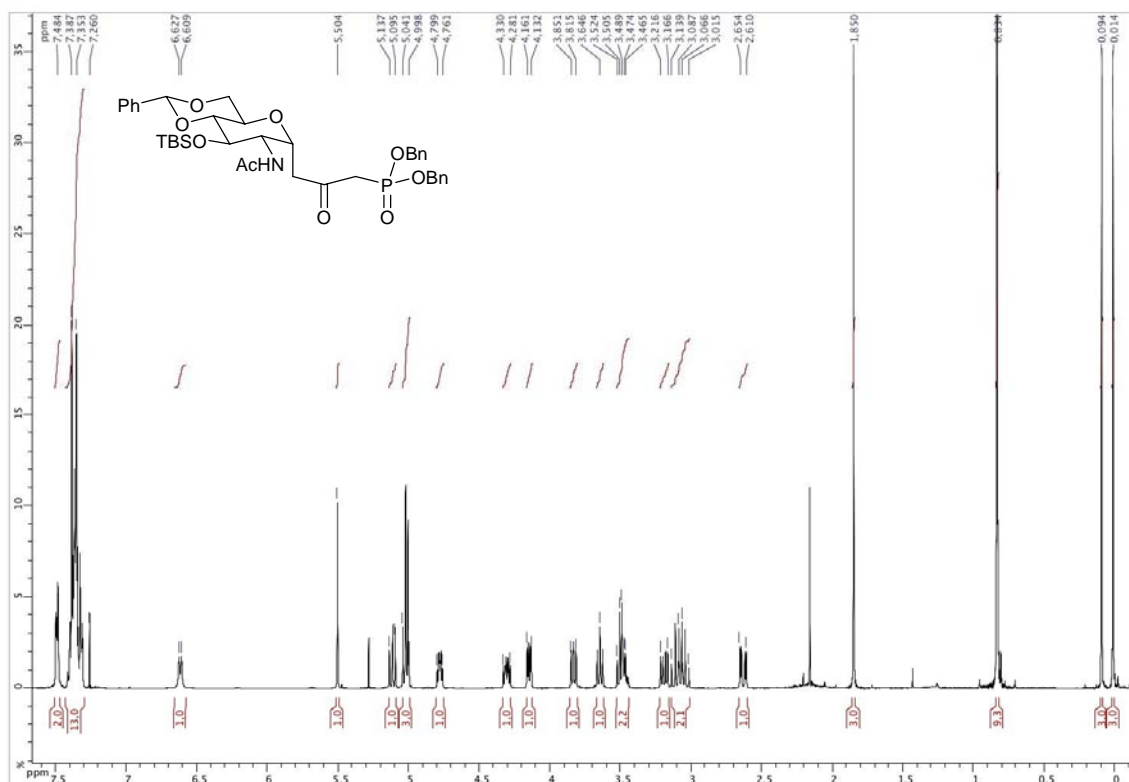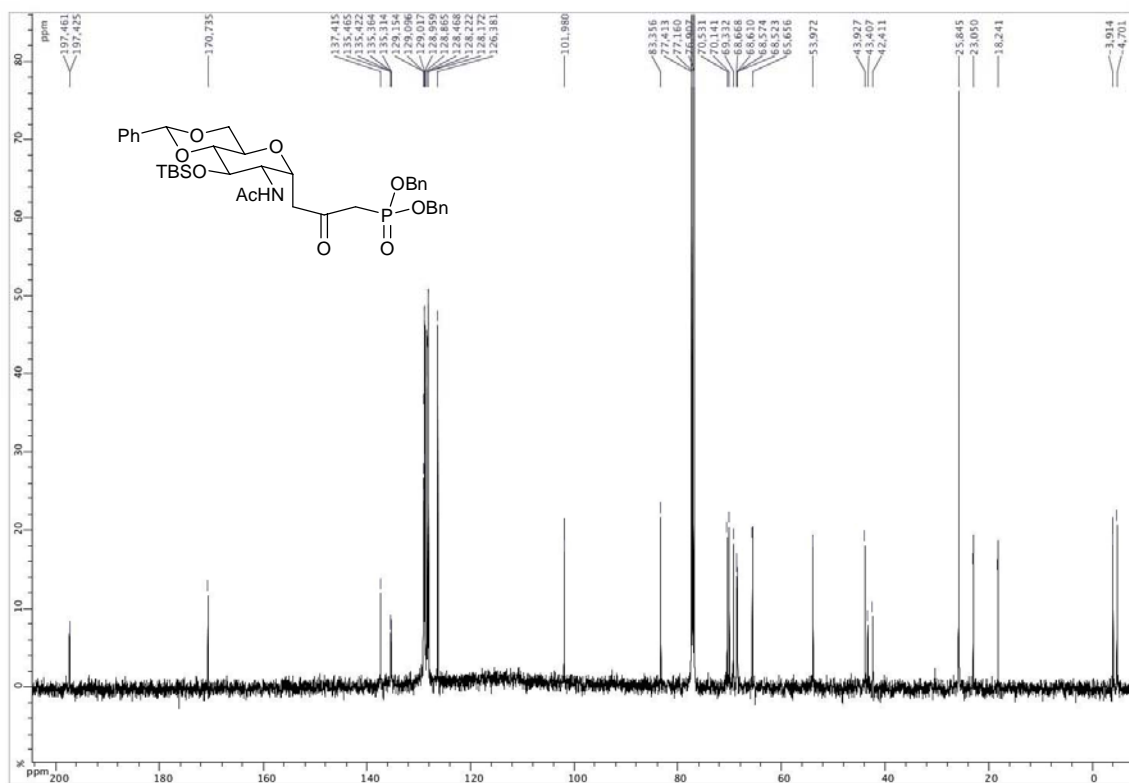



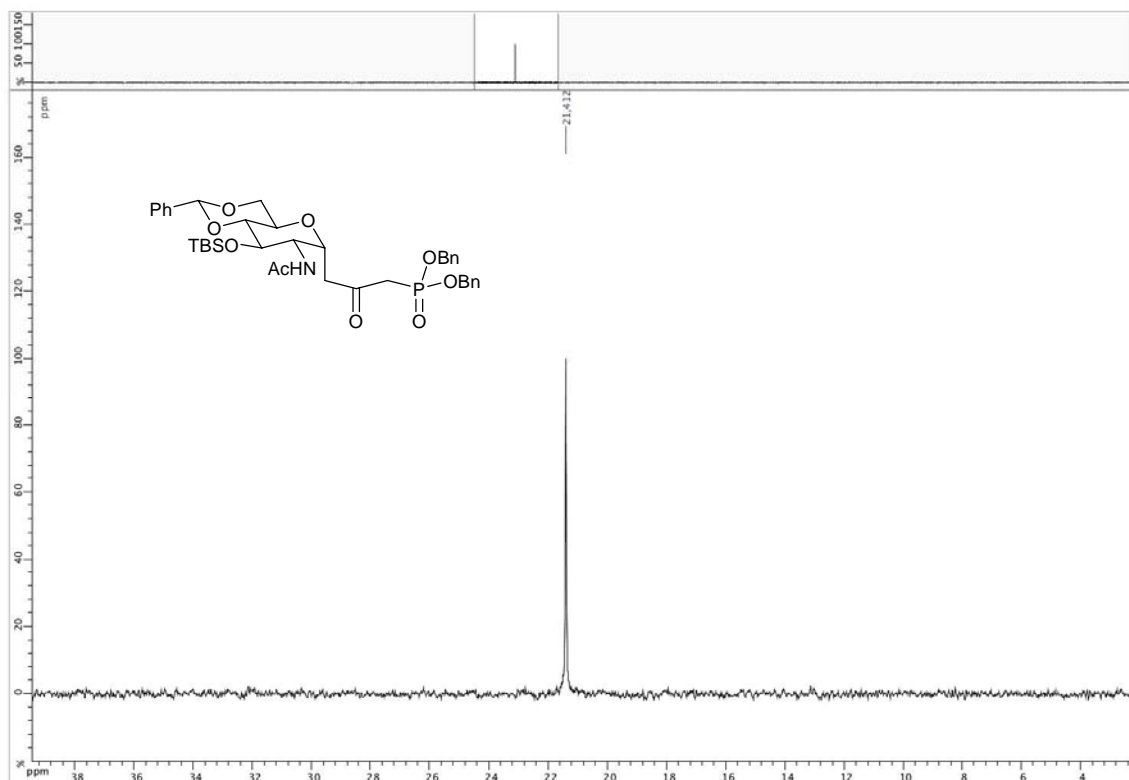

Compound 12 ( $^1\text{H}$ ,  $^{13}\text{C}$ ,  $^{31}\text{P}$ )

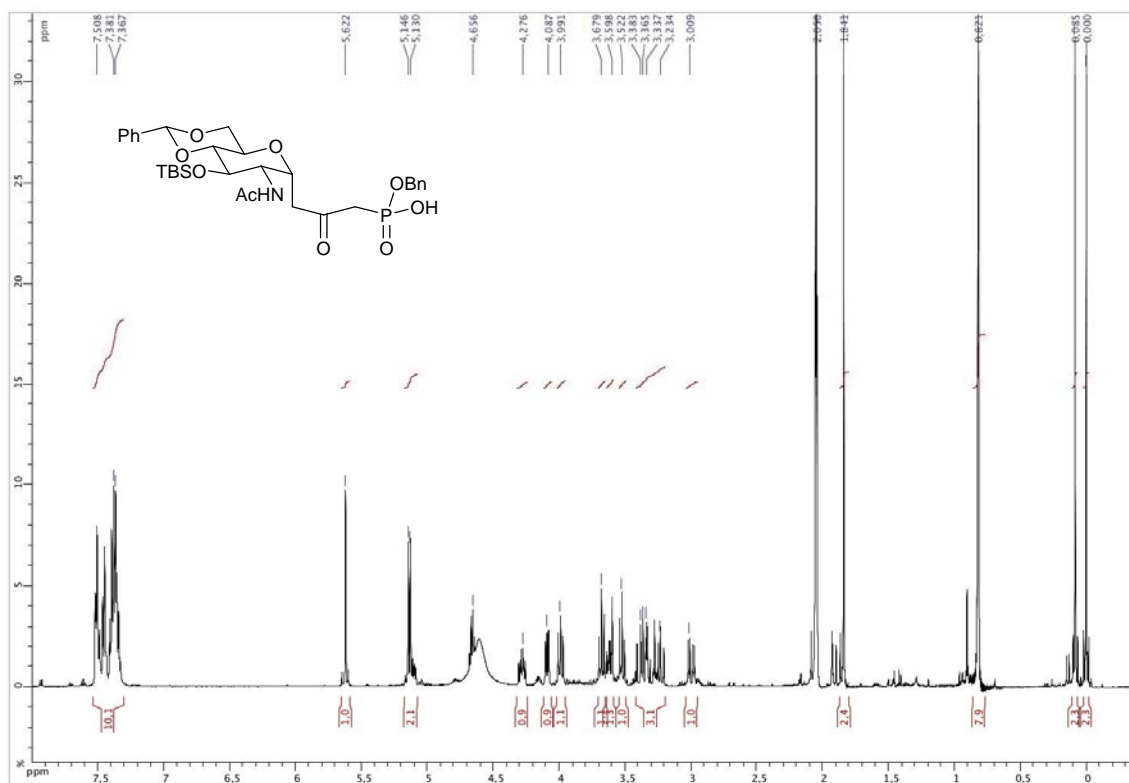

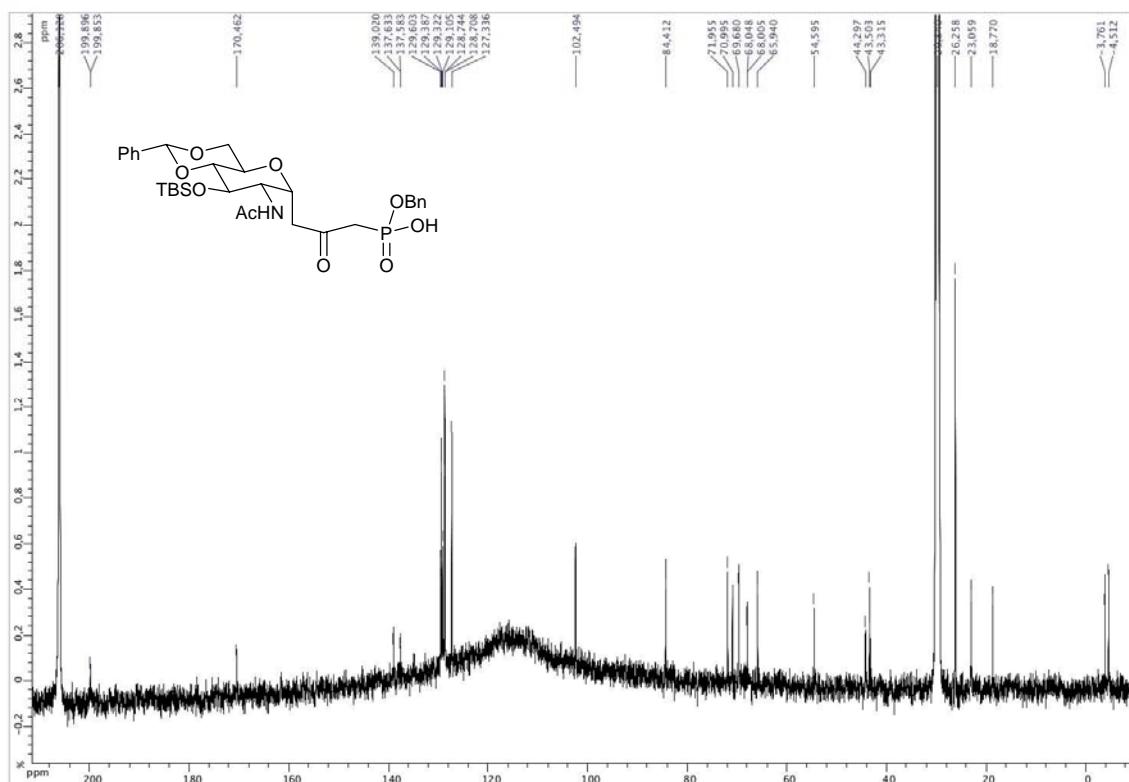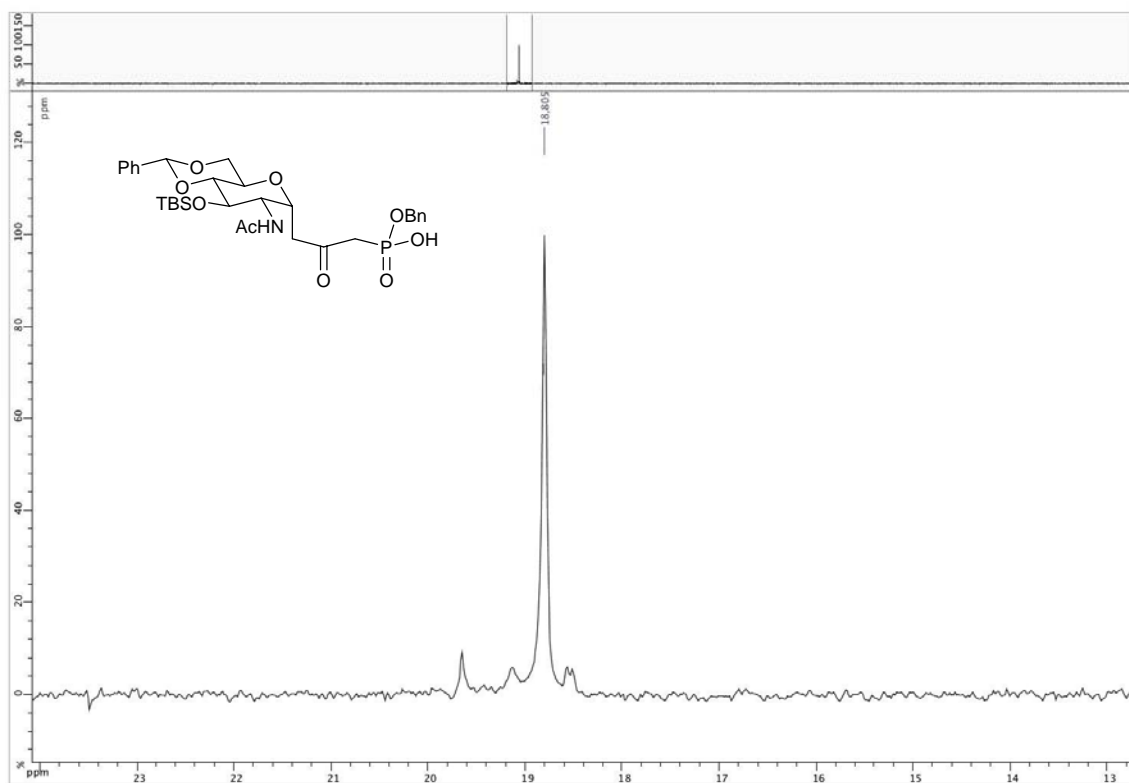

Compound **13** ( $^1\text{H}$ ,  $^{13}\text{C}$ ,  $^{31}\text{P}$ )

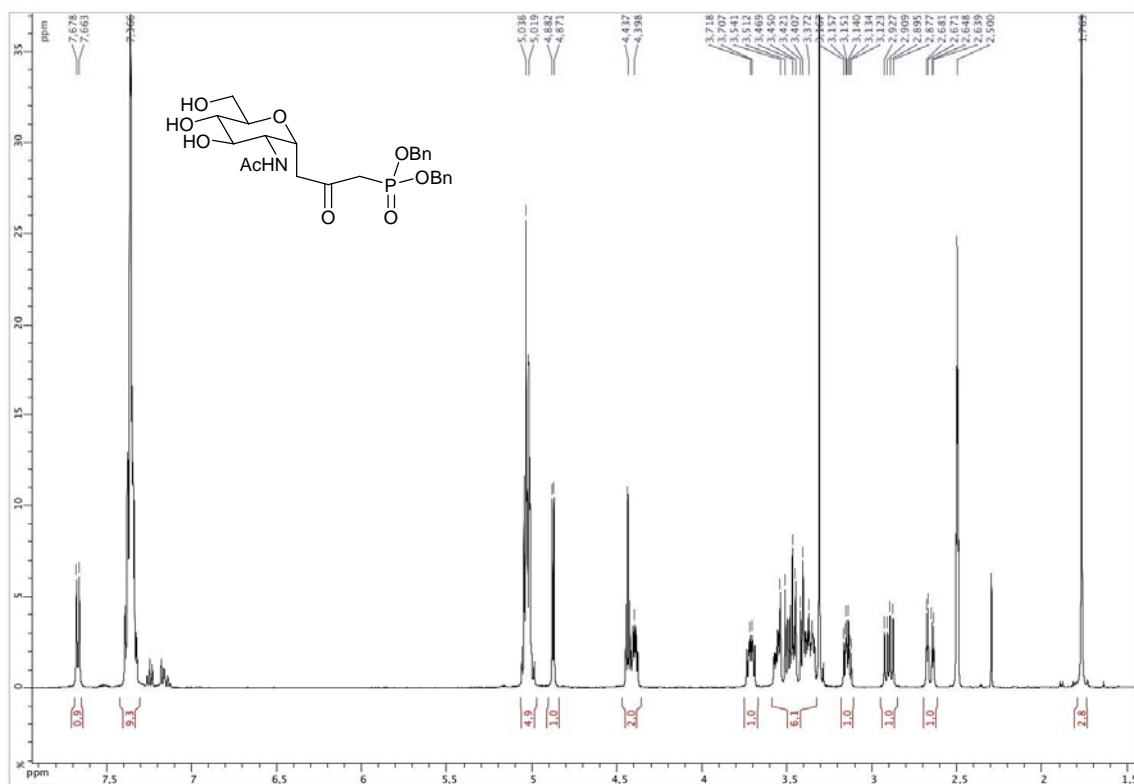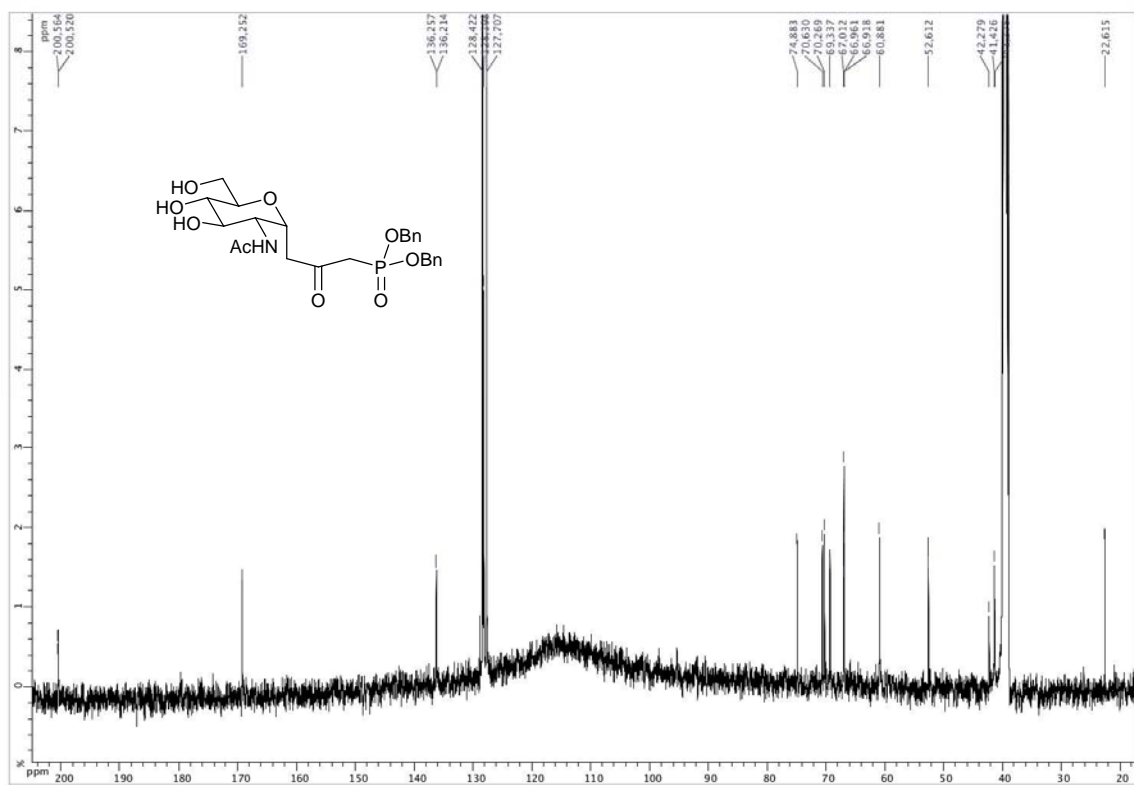

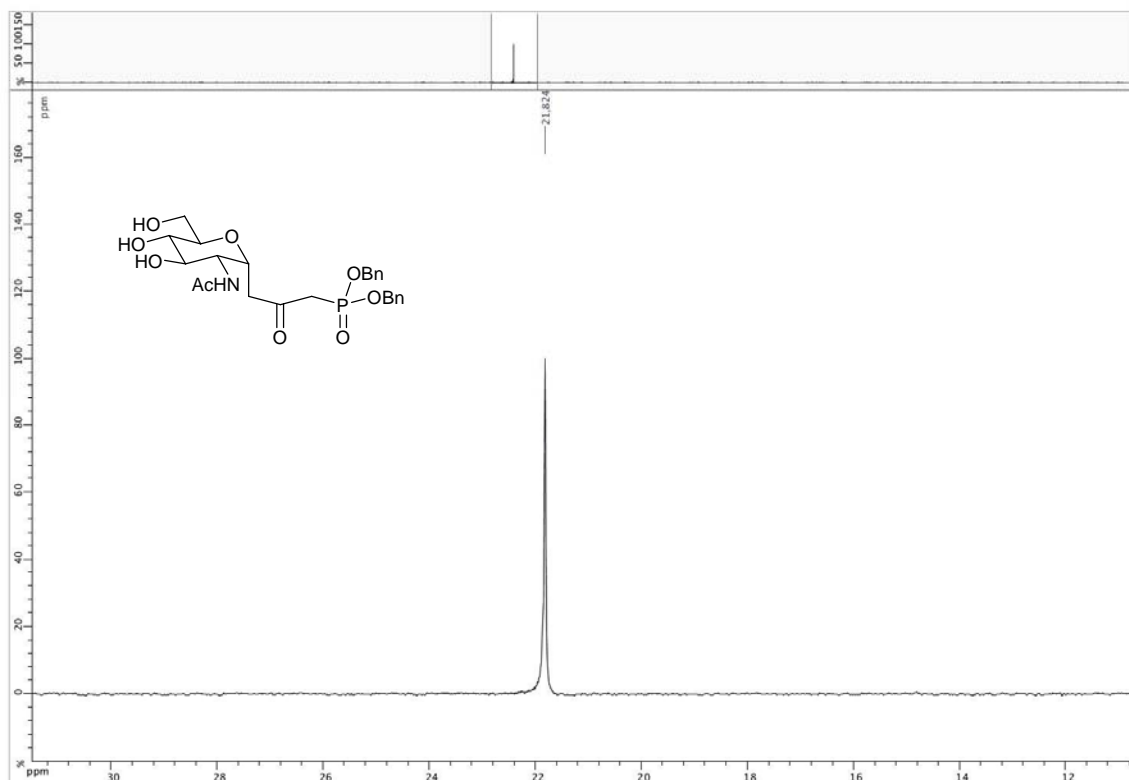

Compound 14 (<sup>1</sup>H, <sup>13</sup>C, <sup>31</sup>P)

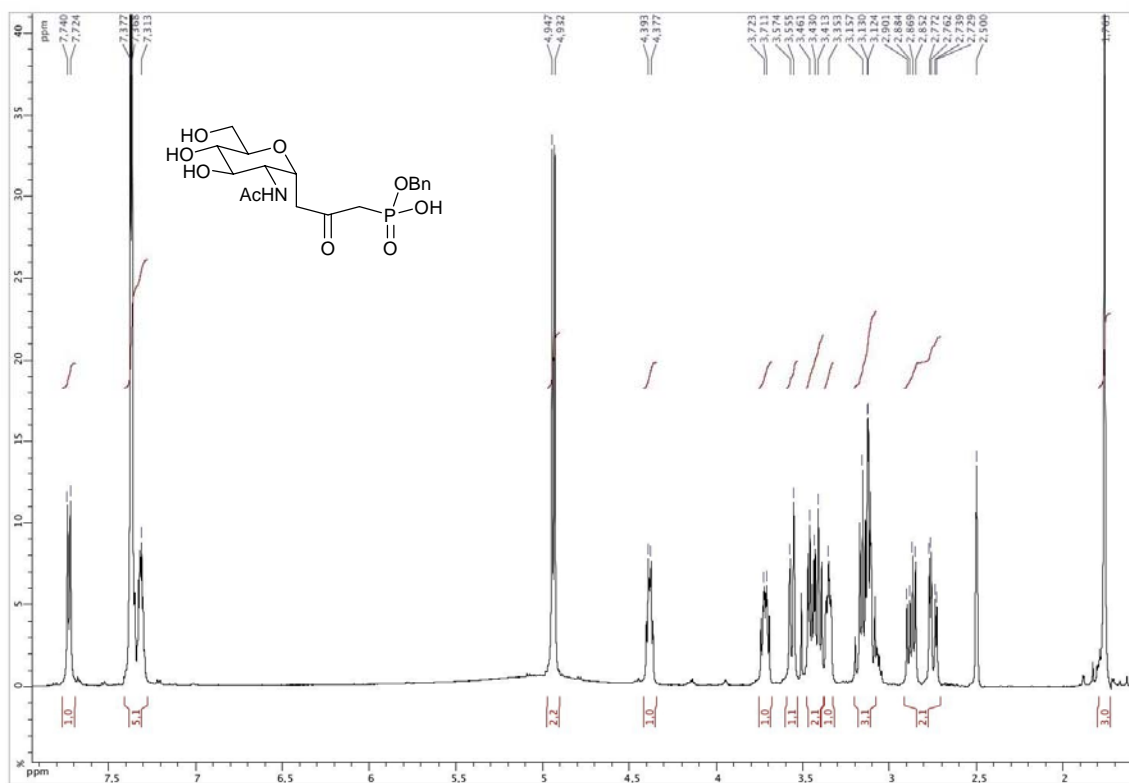

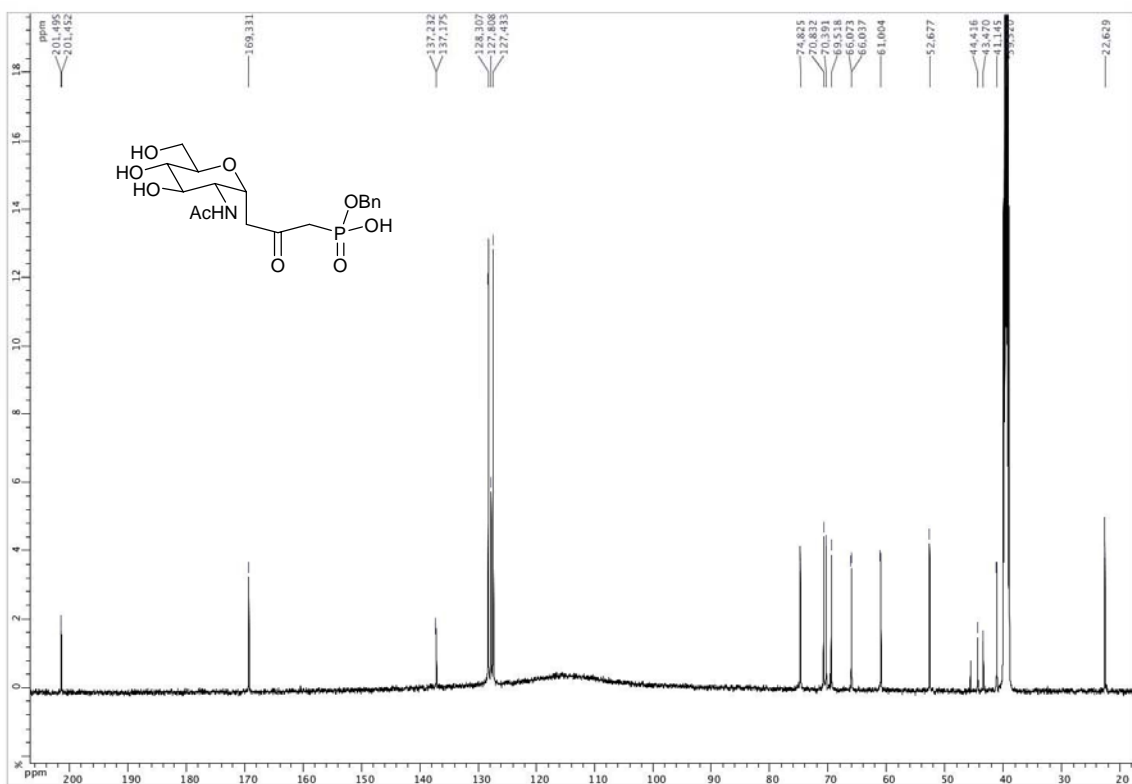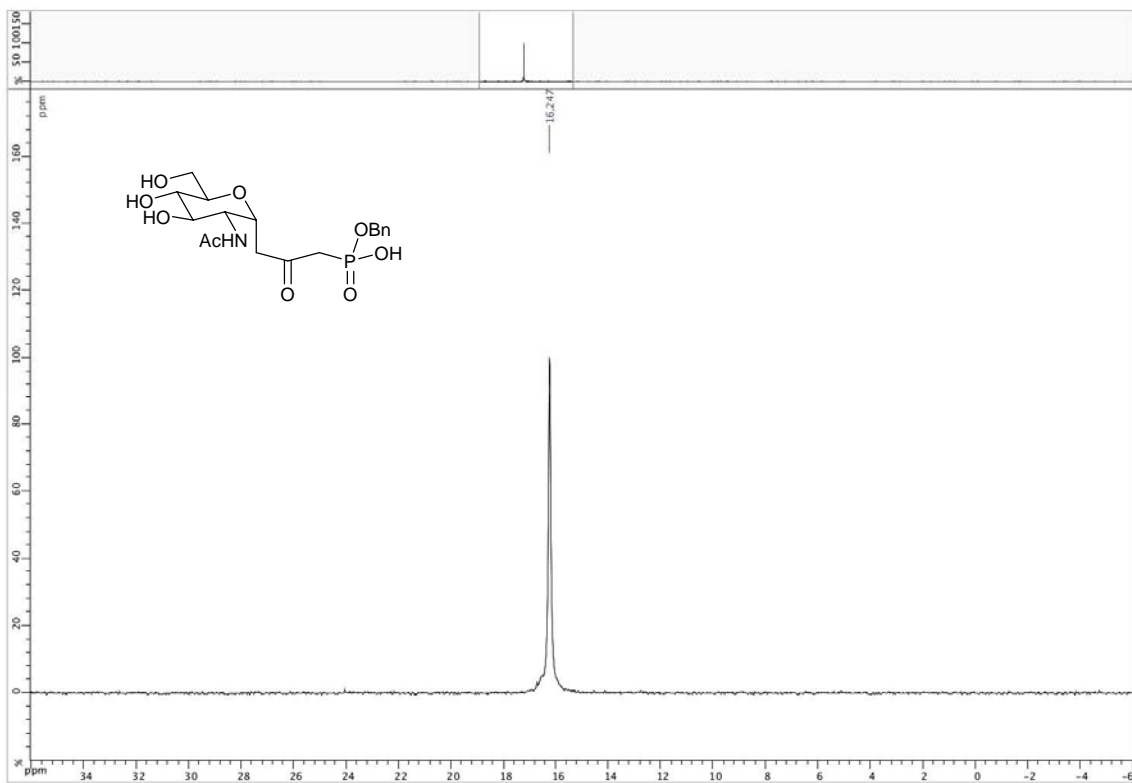

Compound **15** ( $^1\text{H}$ ,  $^{13}\text{C}$ ,  $^{31}\text{P}$ )

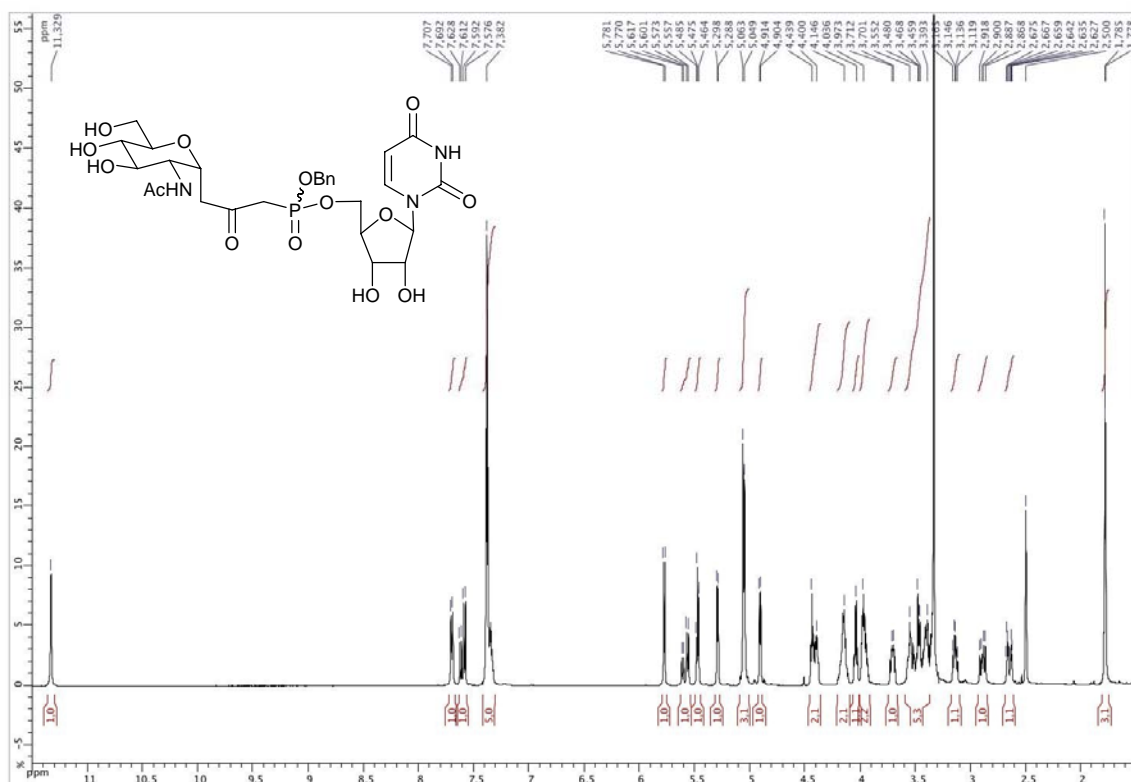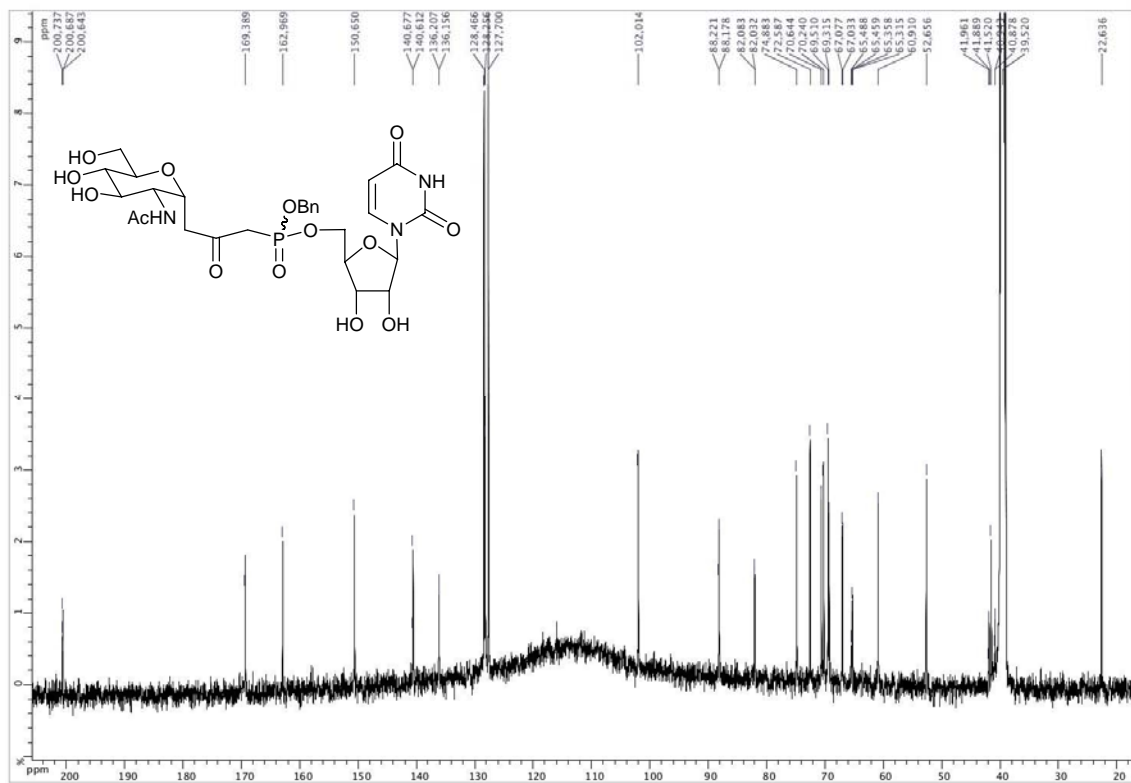



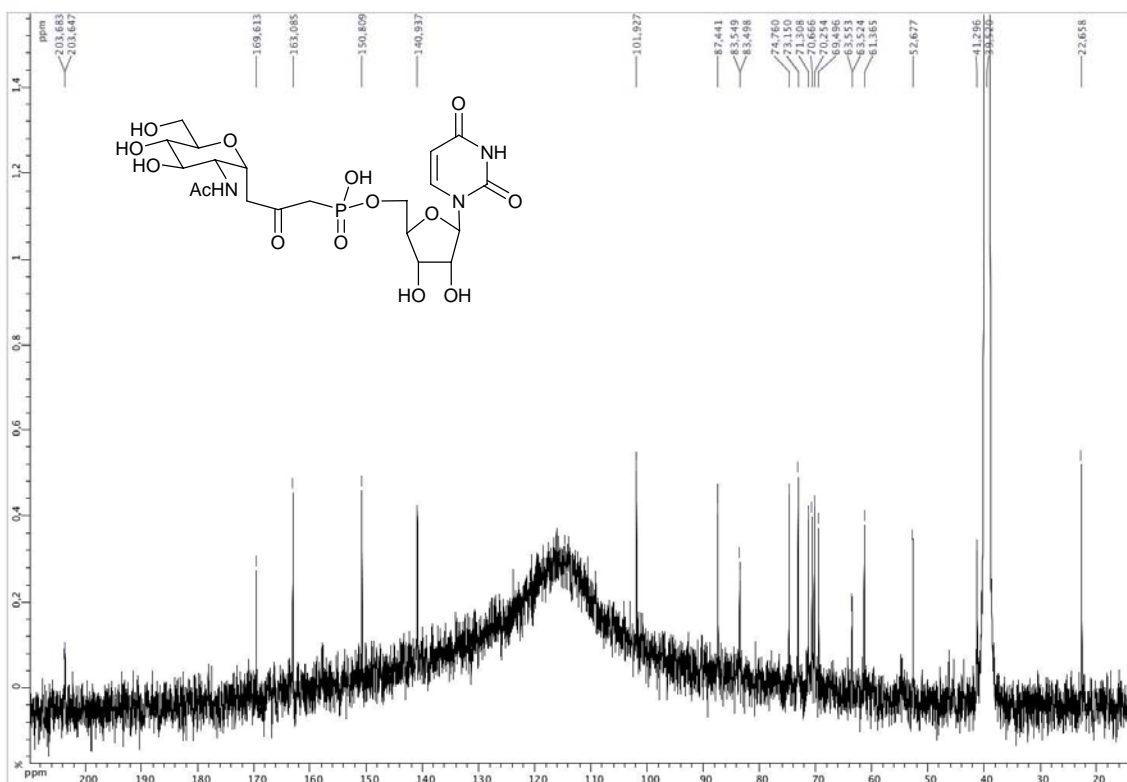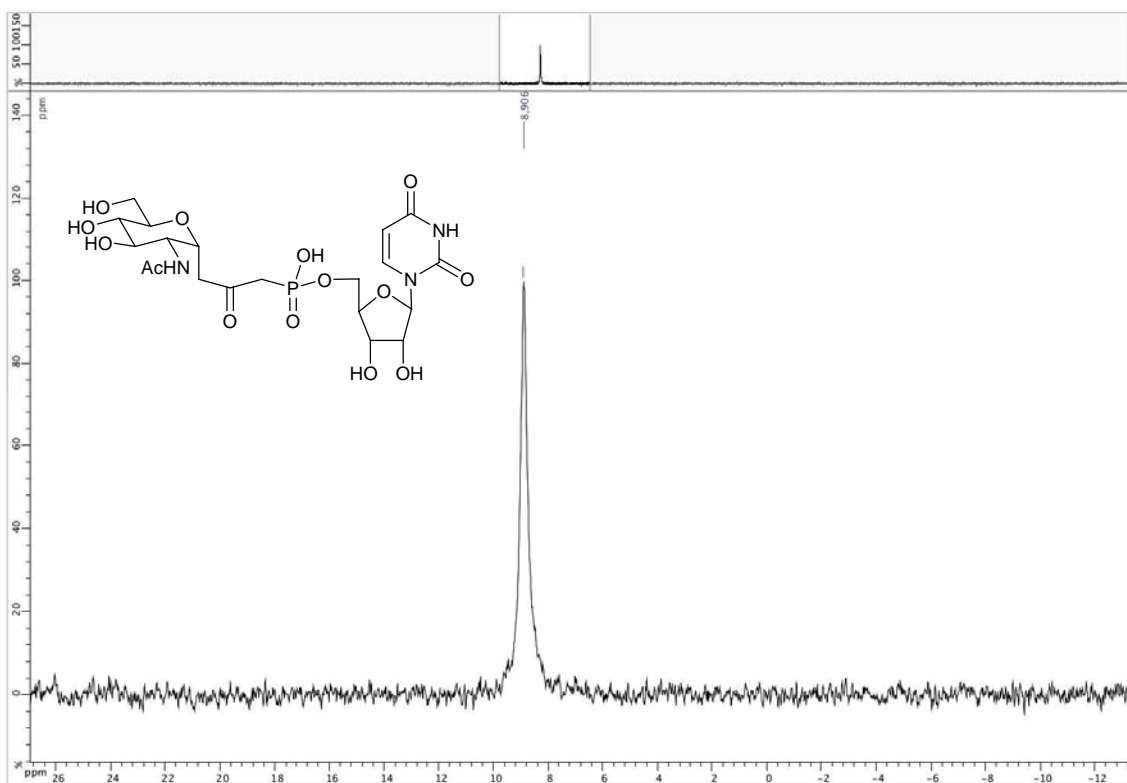



### Compound 17 ( $^1\text{H}$ , $^{13}\text{C}$ )

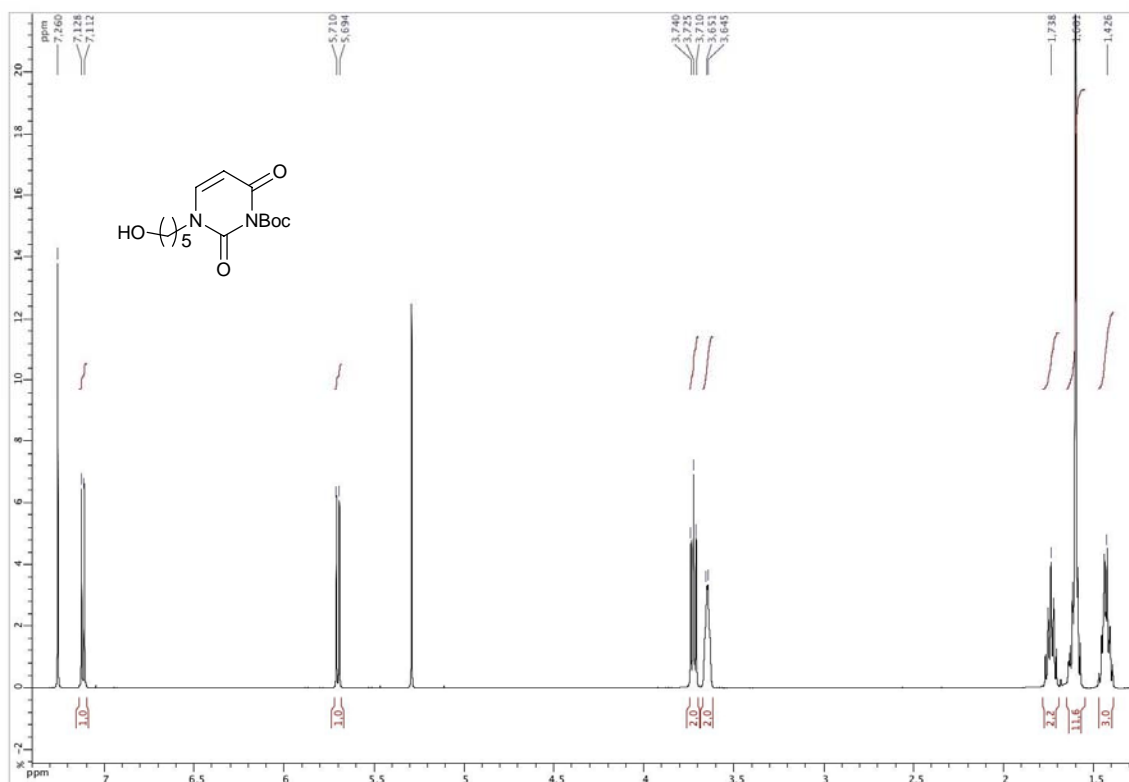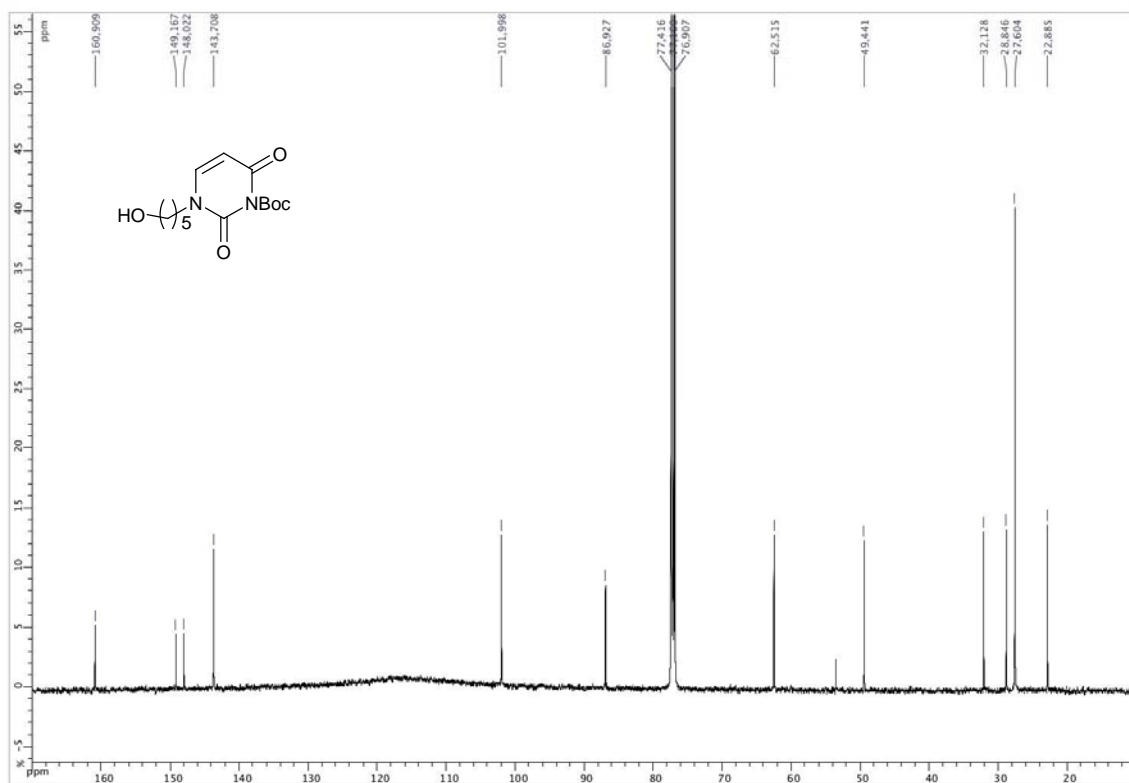

Compound **18** ( $^1\text{H}$ ,  $^{13}\text{C}$ ,  $^{31}\text{P}$ )

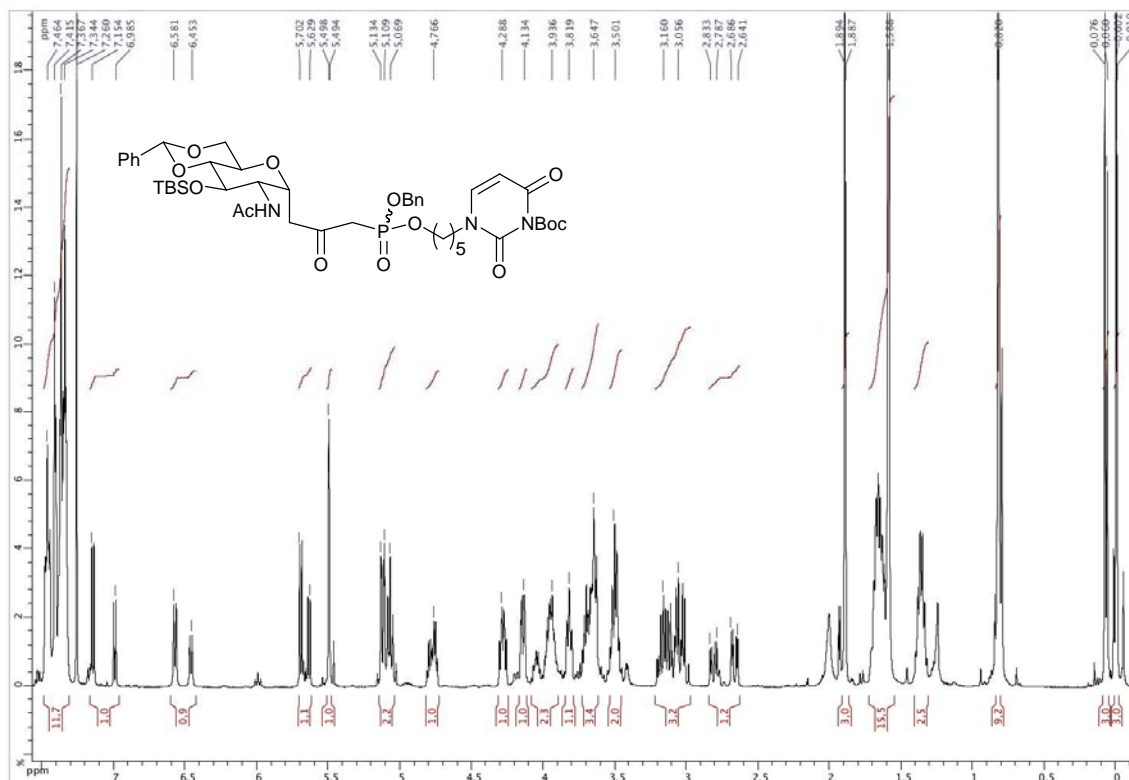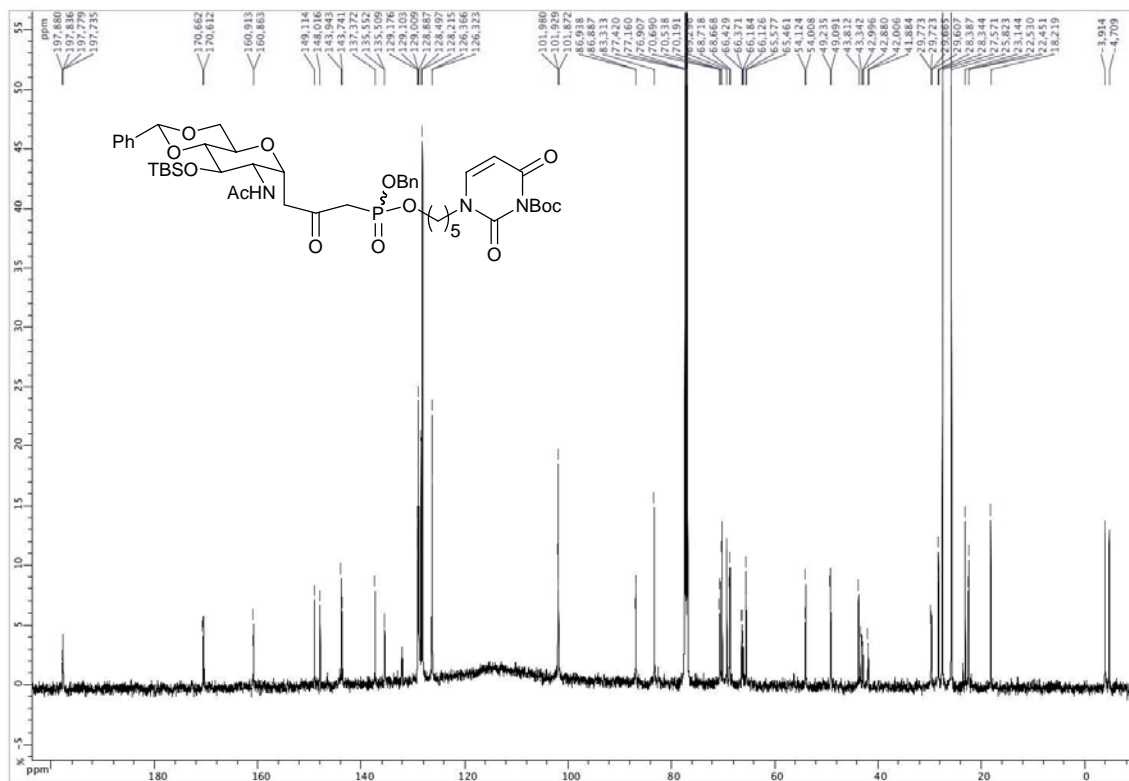

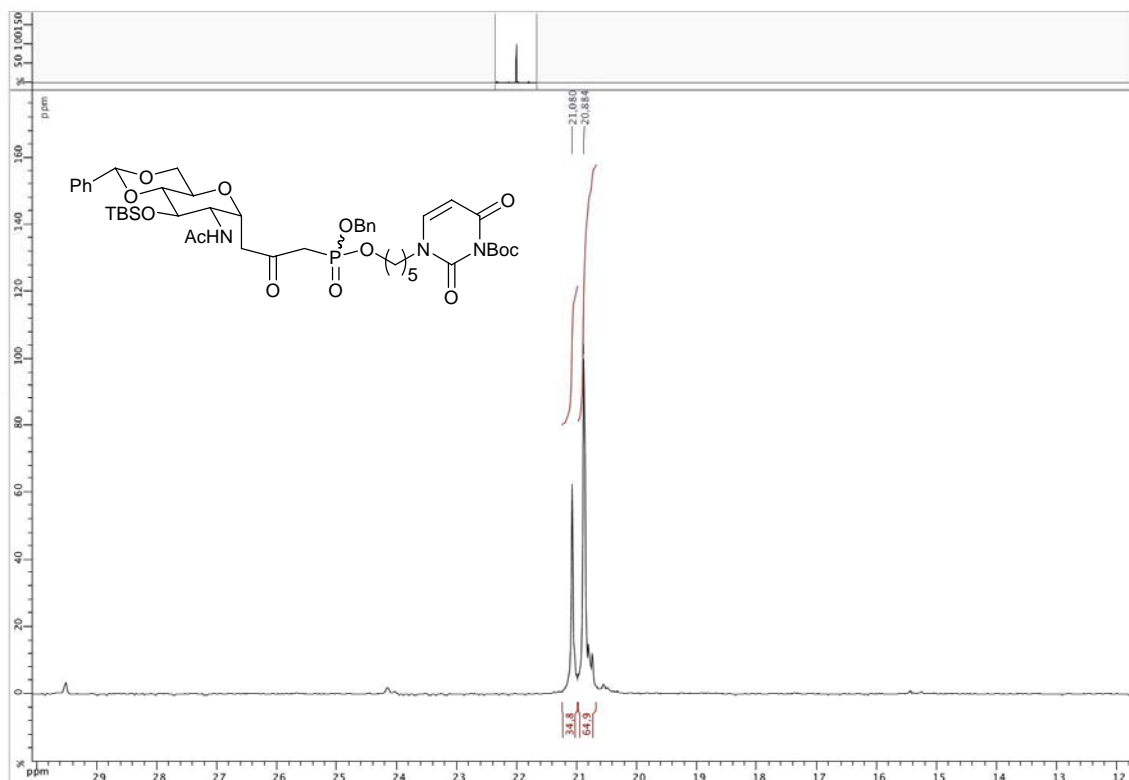

Compound 19 ( $^1\text{H}$ ,  $^{13}\text{C}$ ,  $^{31}\text{P}$ )

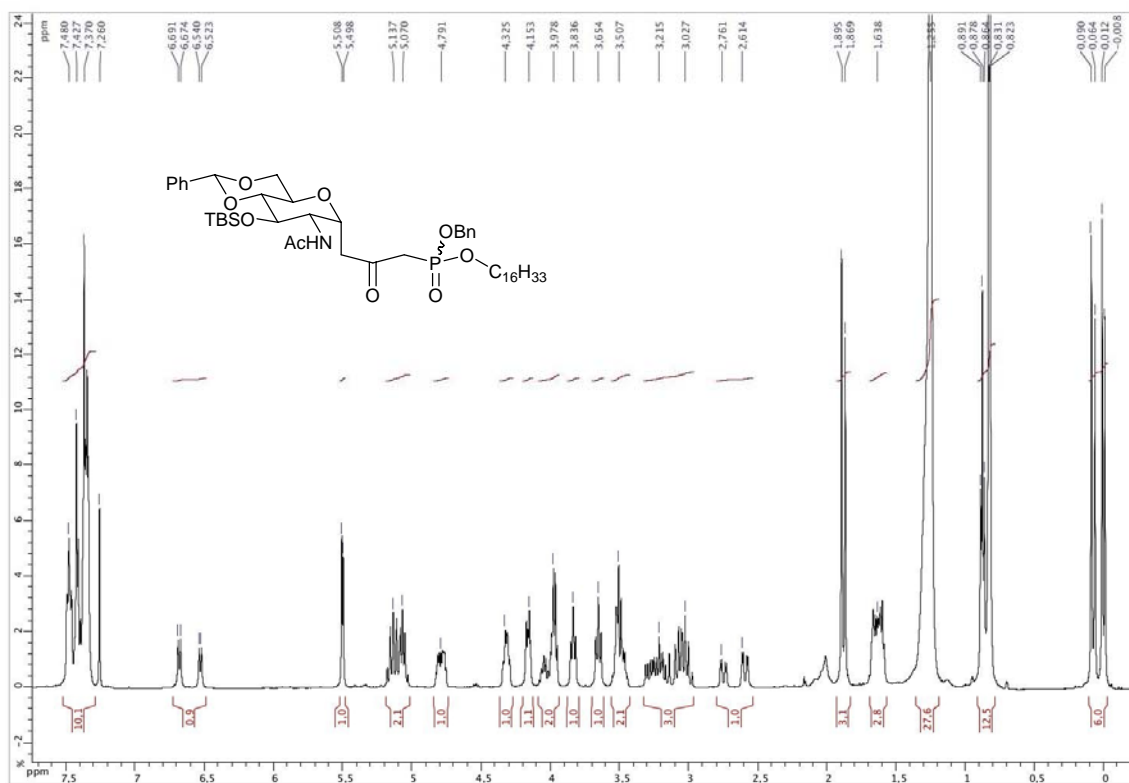

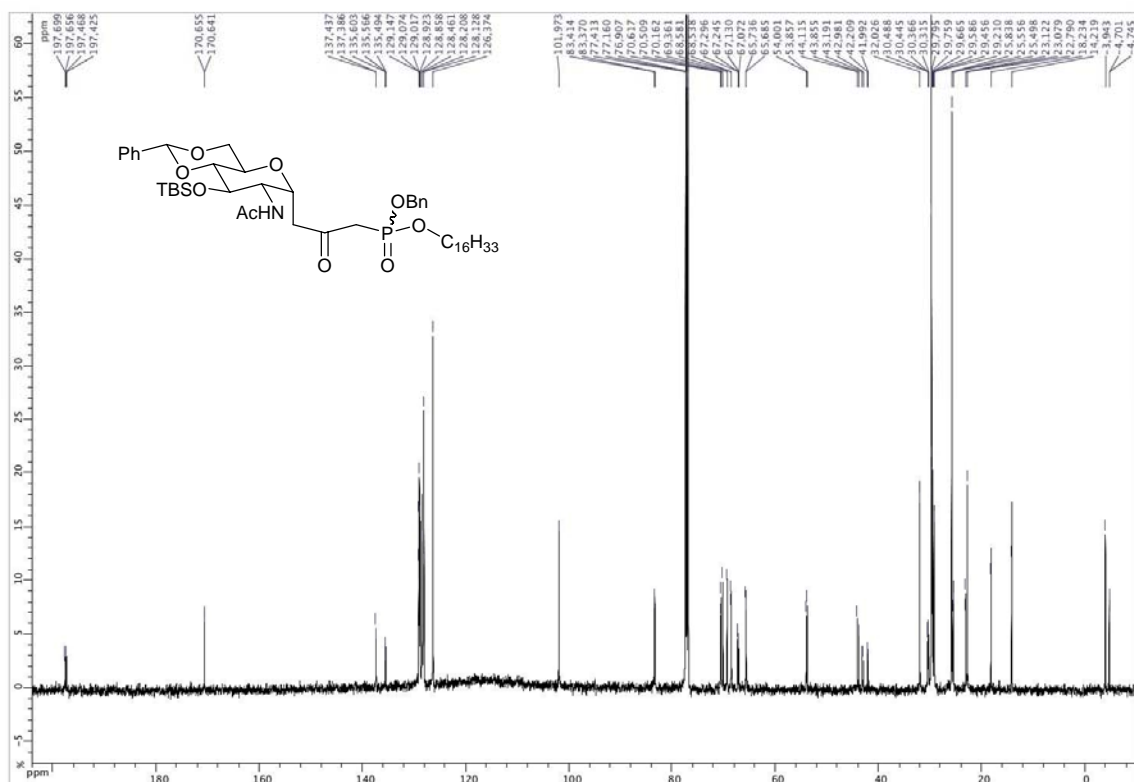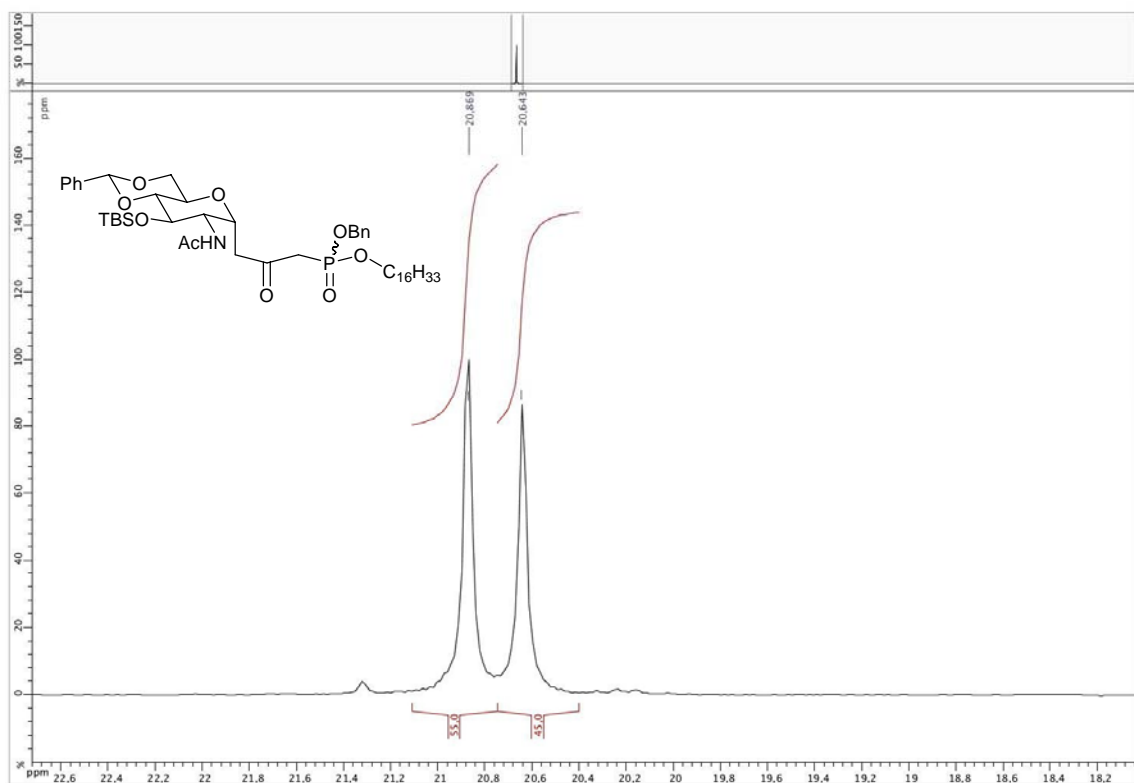

Compound **20** ( $^1\text{H}$ ,  $^{13}\text{C}$ ,  $^{31}\text{P}$ )

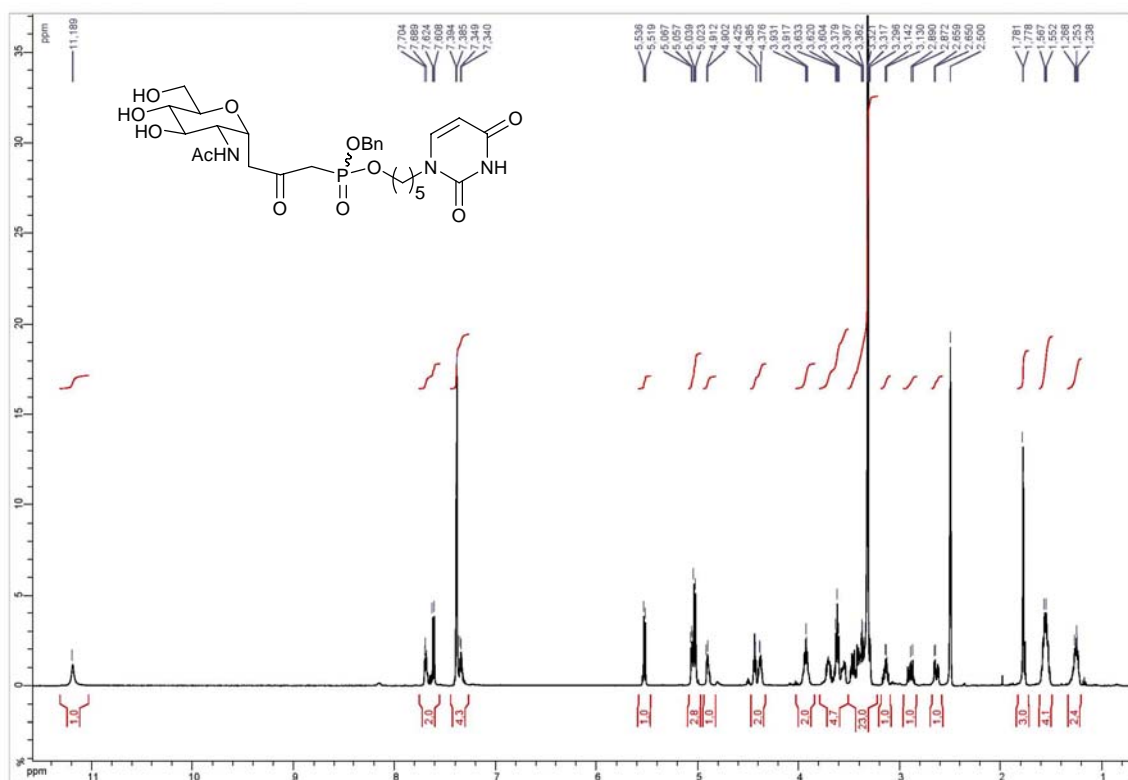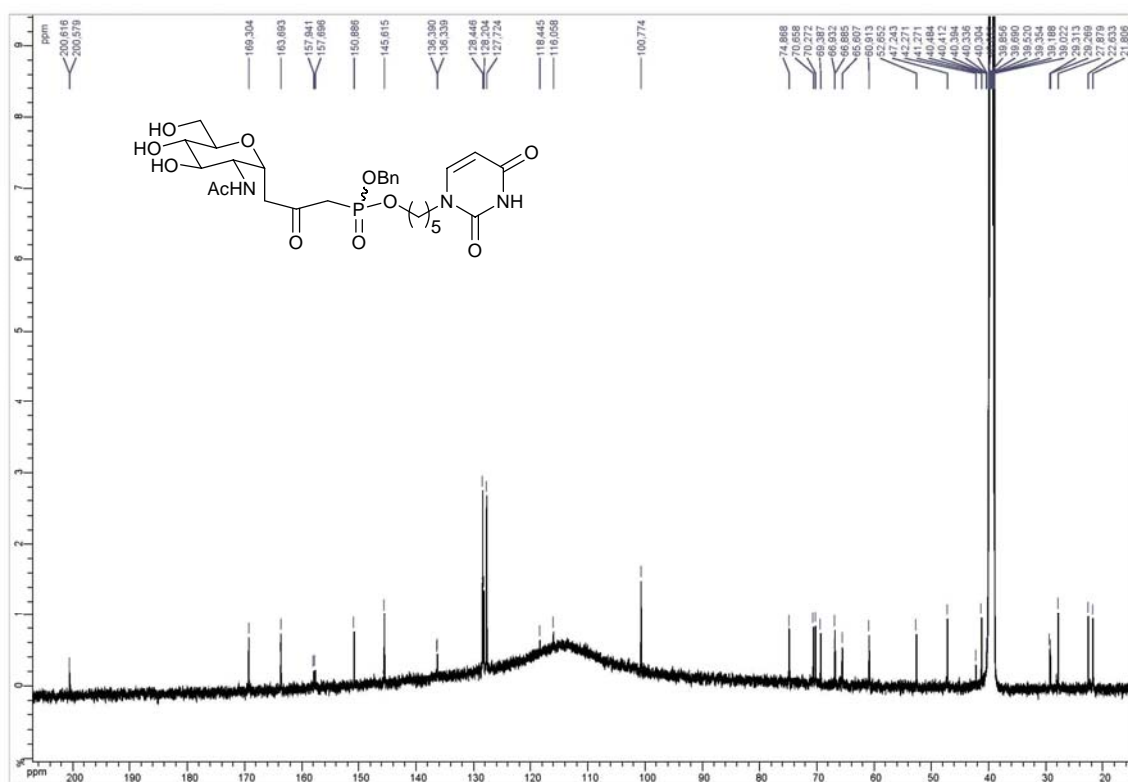

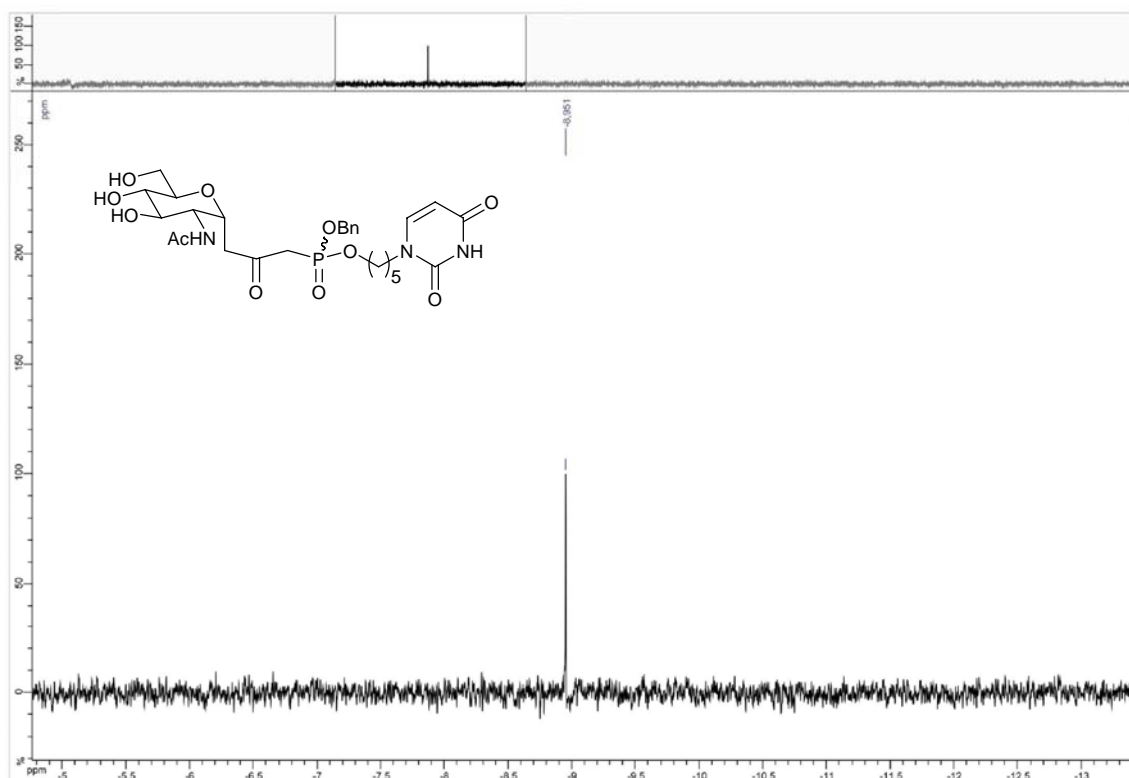

Compound **21** ( $^1\text{H}$ ,  $^{13}\text{C}$ ,  $^{31}\text{P}$ )

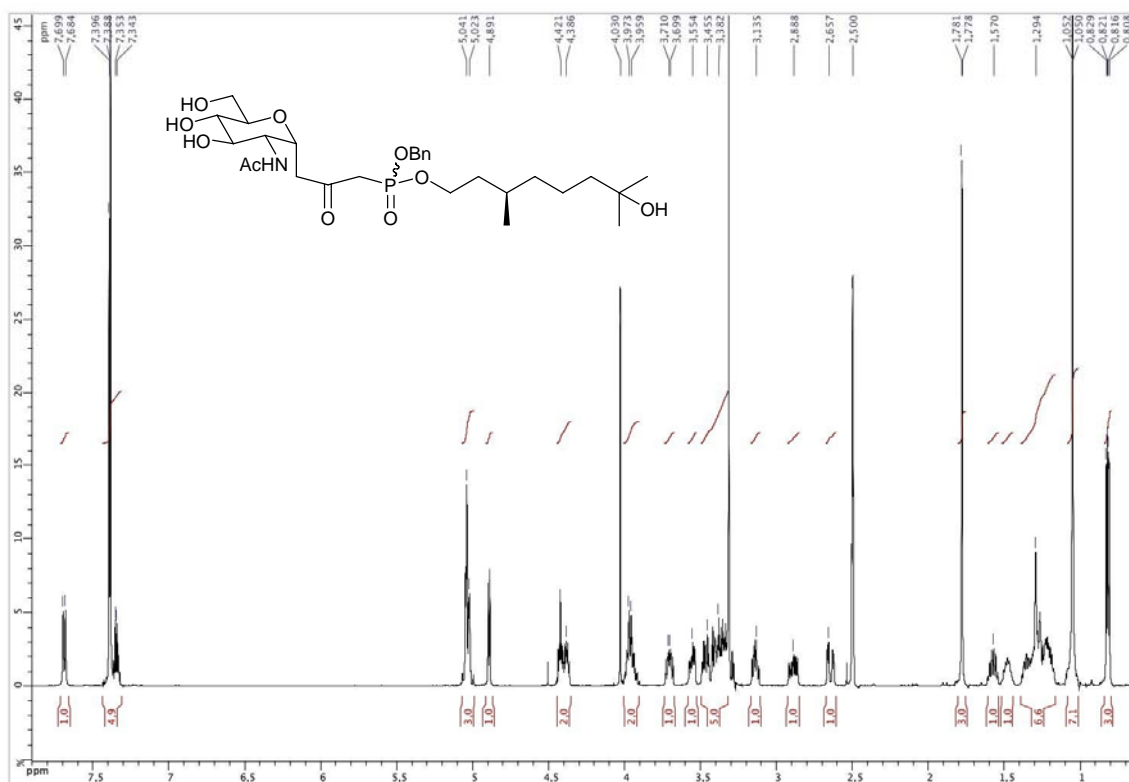

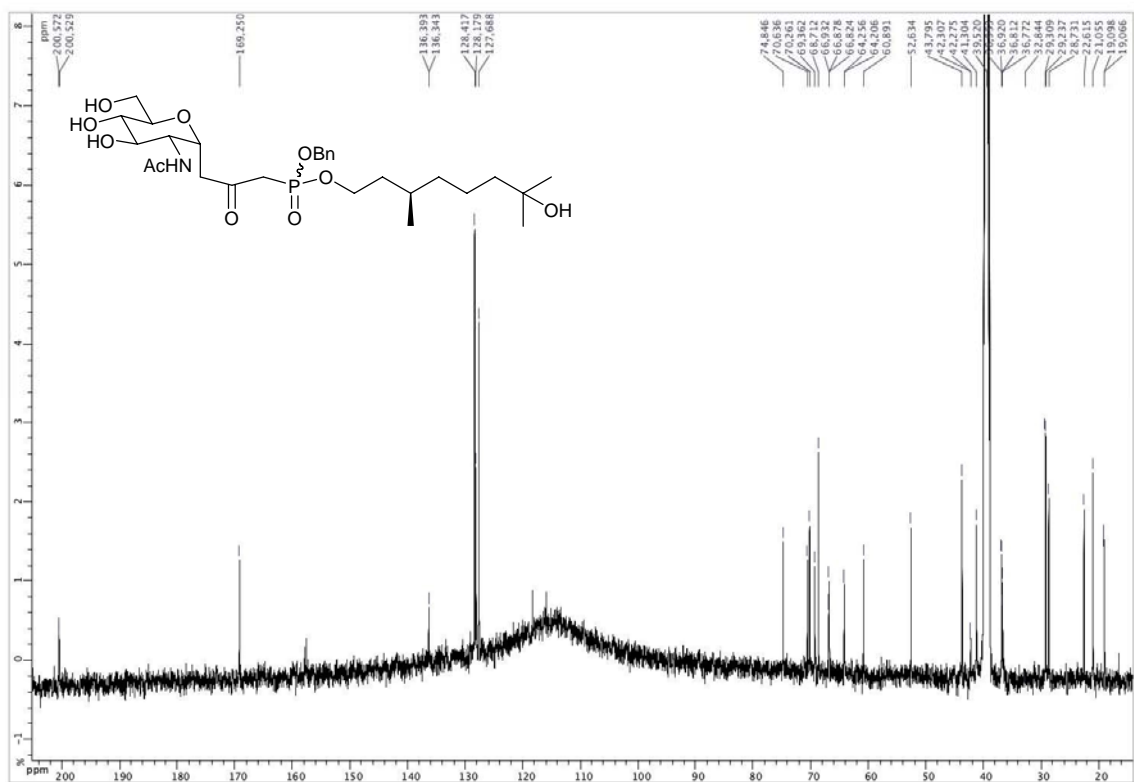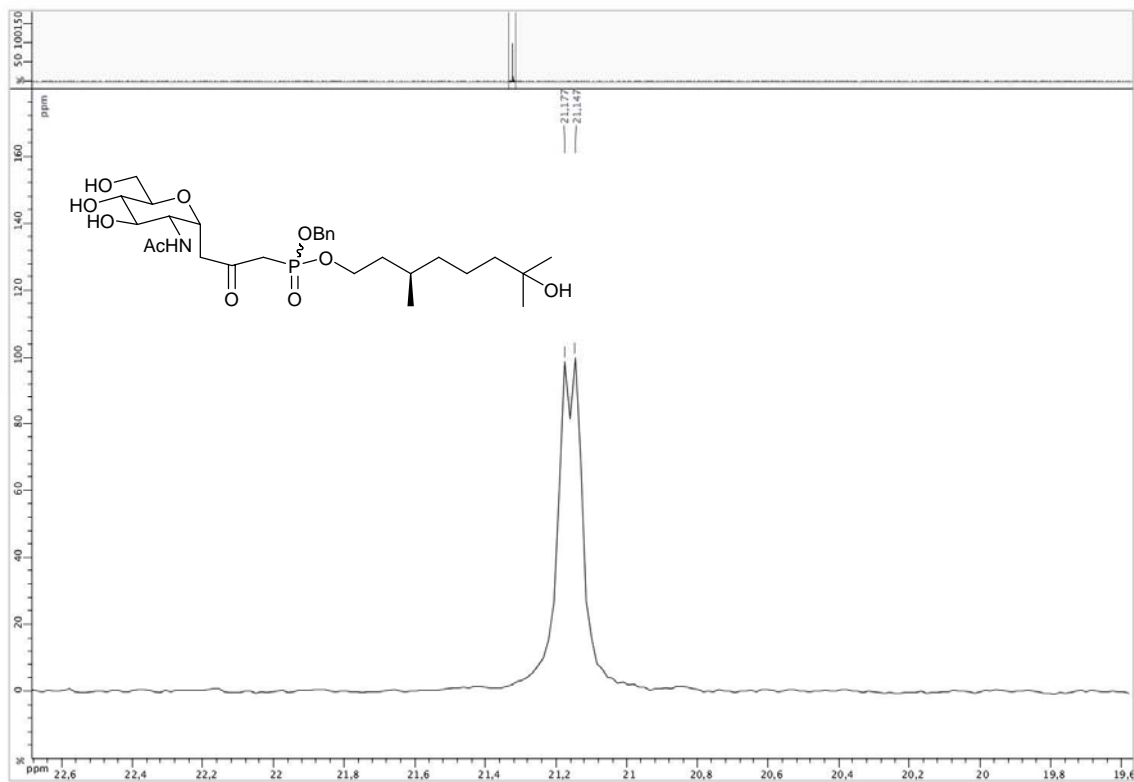

Compound **22** ( $^1\text{H}$ ,  $^{13}\text{C}$ ,  $^{31}\text{P}$ )

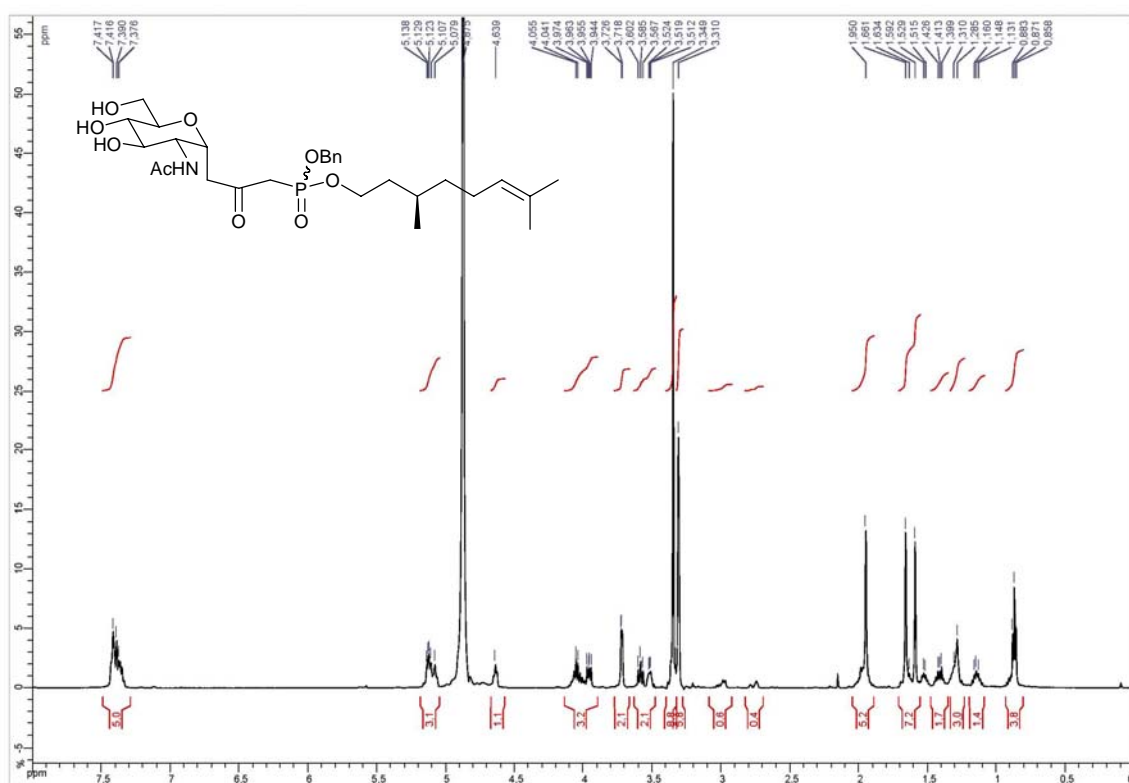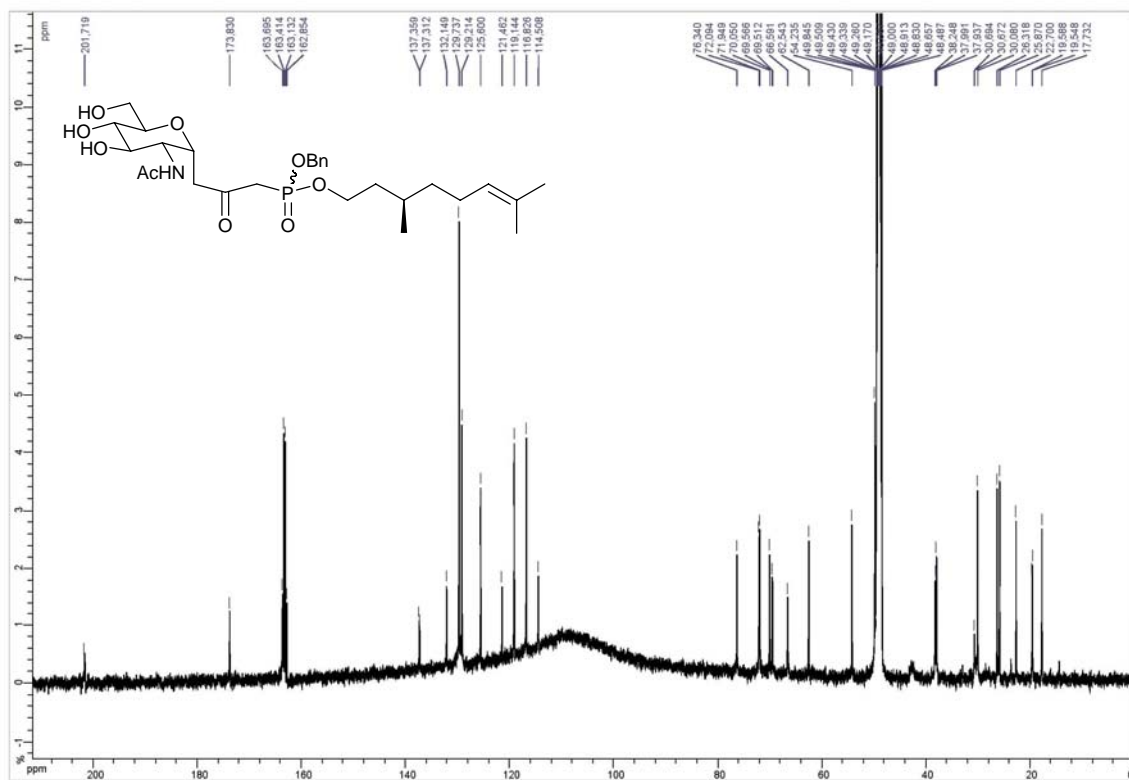



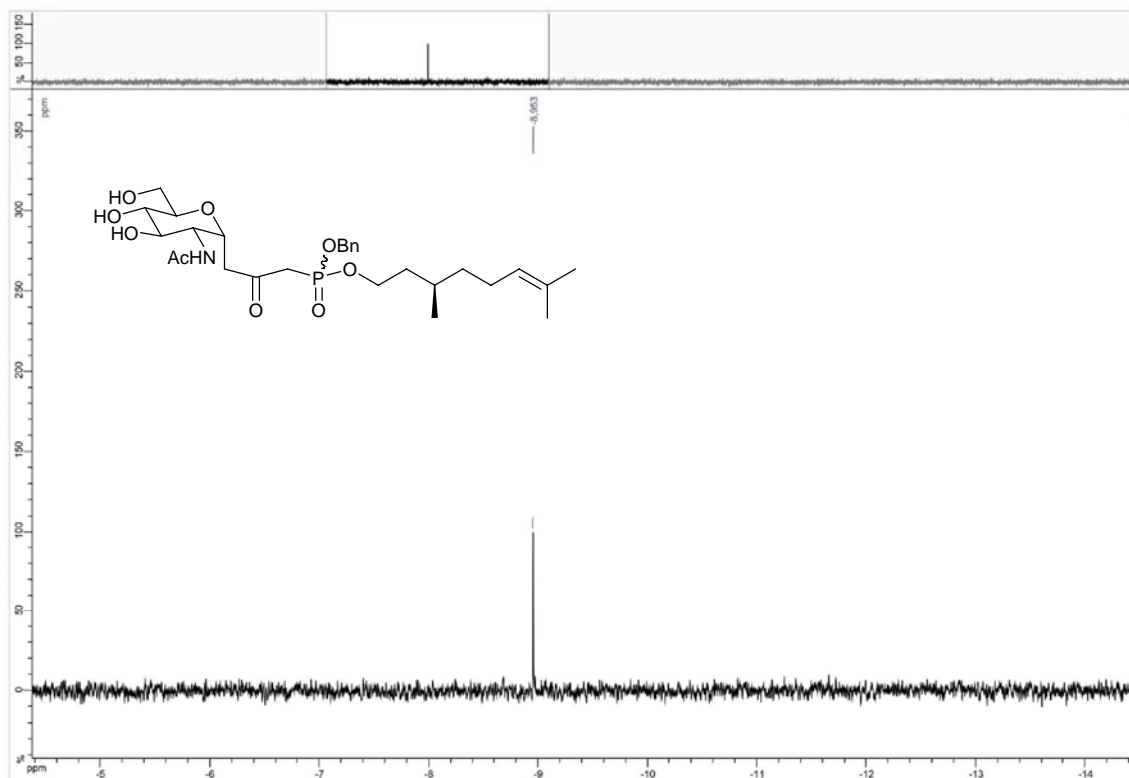

Compound 23 (<sup>1</sup>H, <sup>13</sup>C, <sup>31</sup>P)

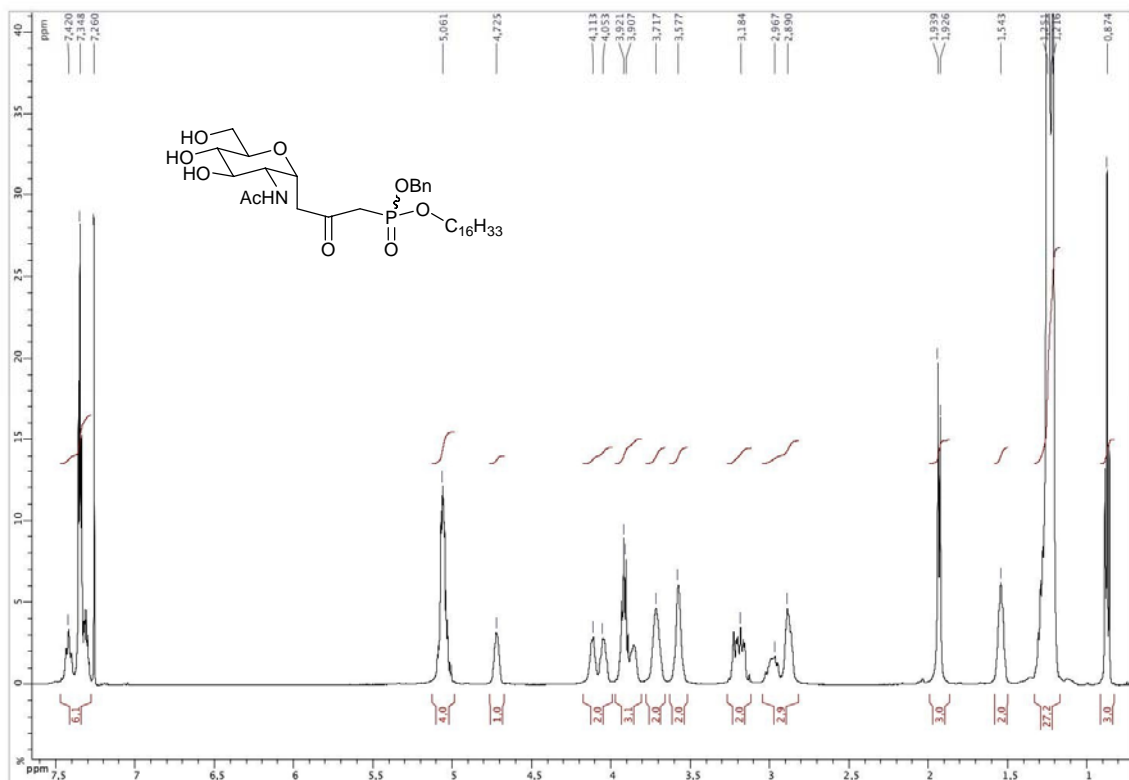

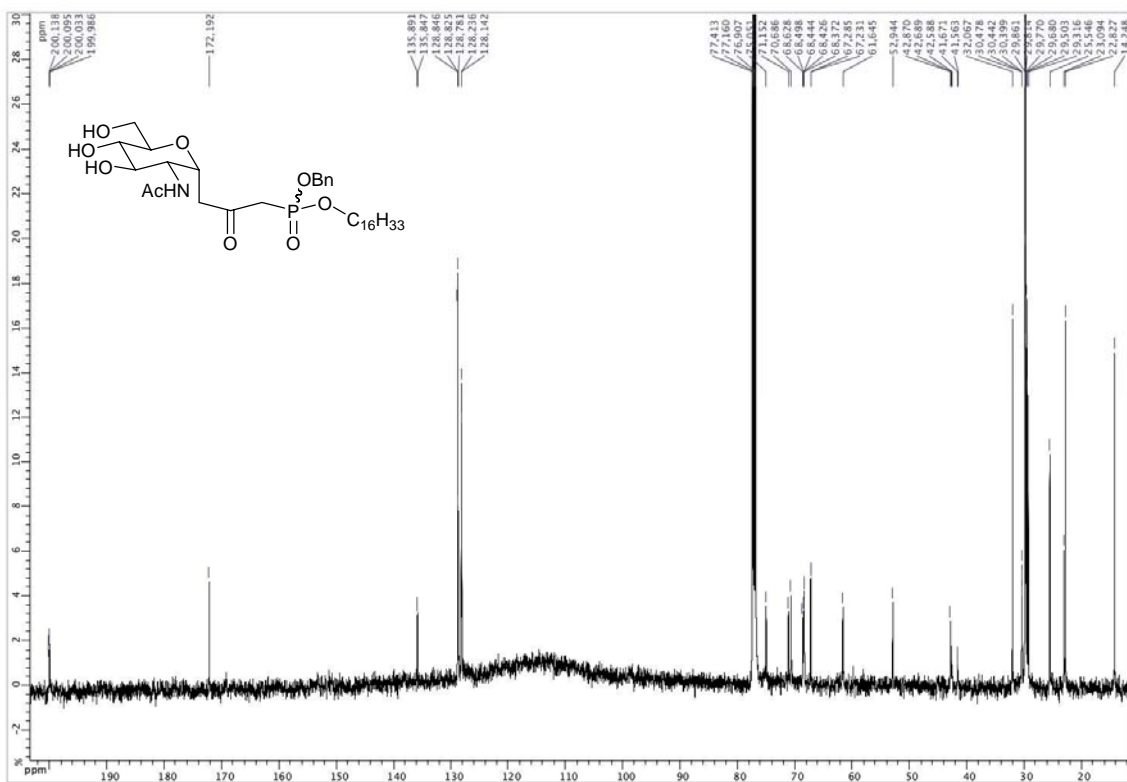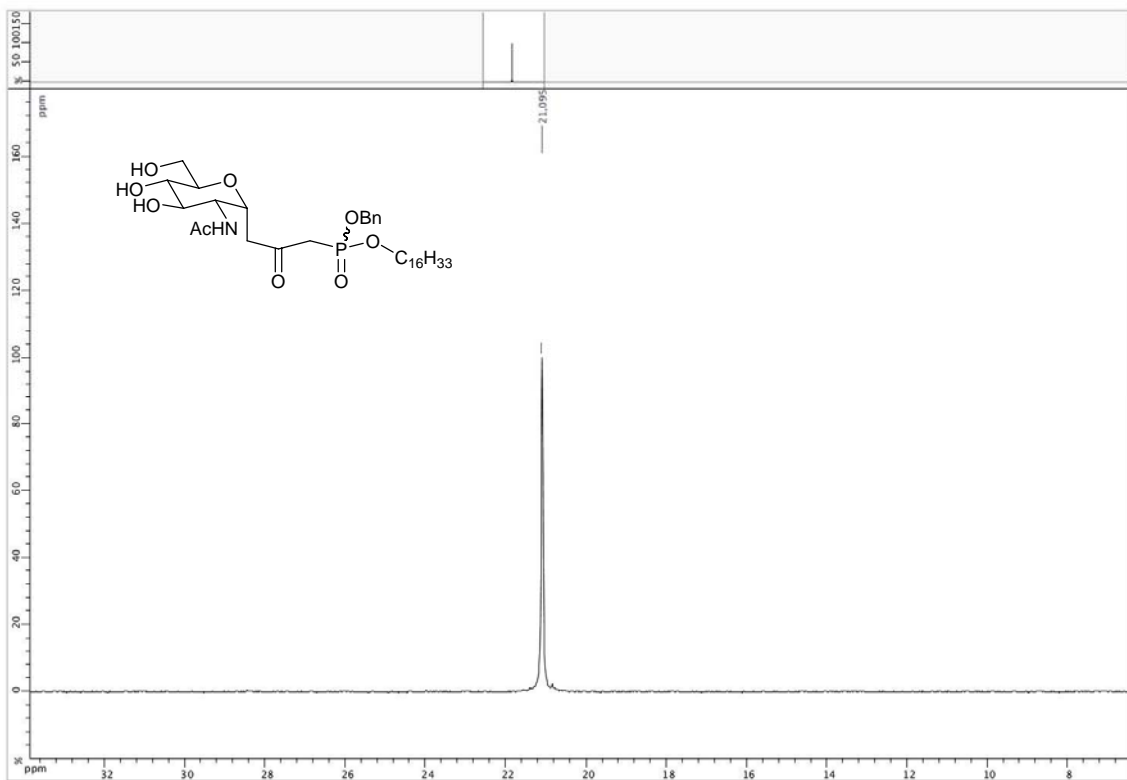

Compound **24** ( $^1\text{H}$ ,  $^{13}\text{C}$ ,  $^{31}\text{P}$ )

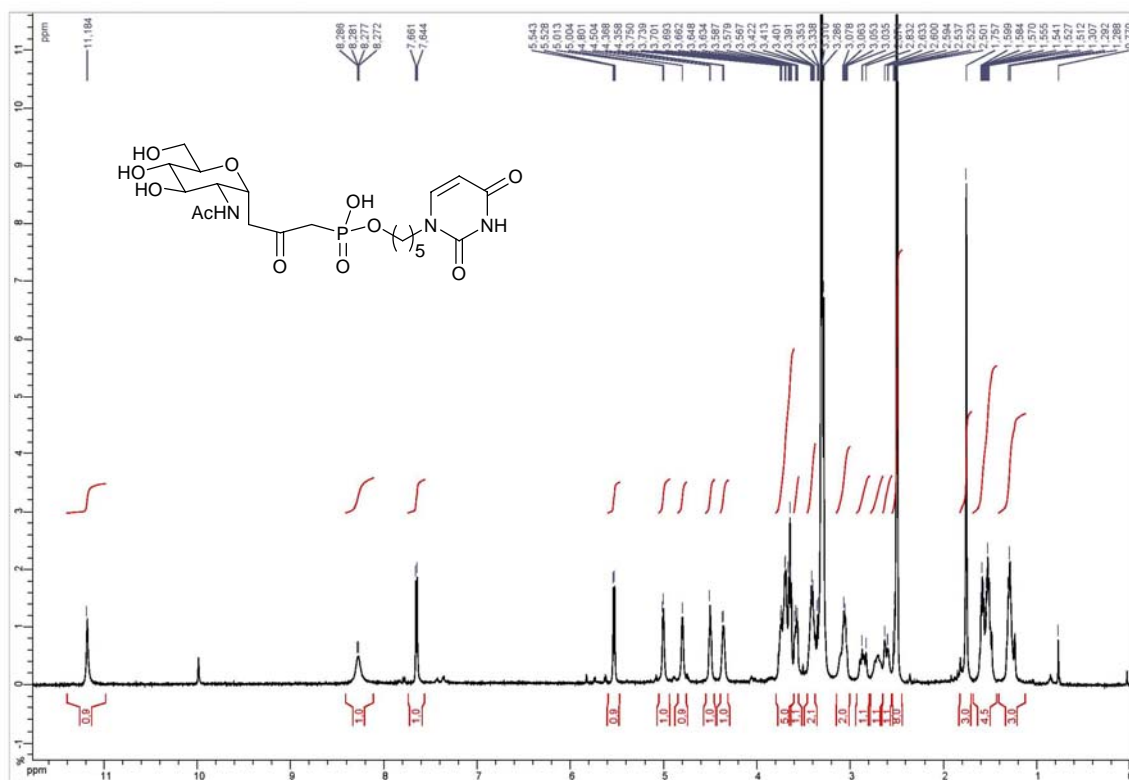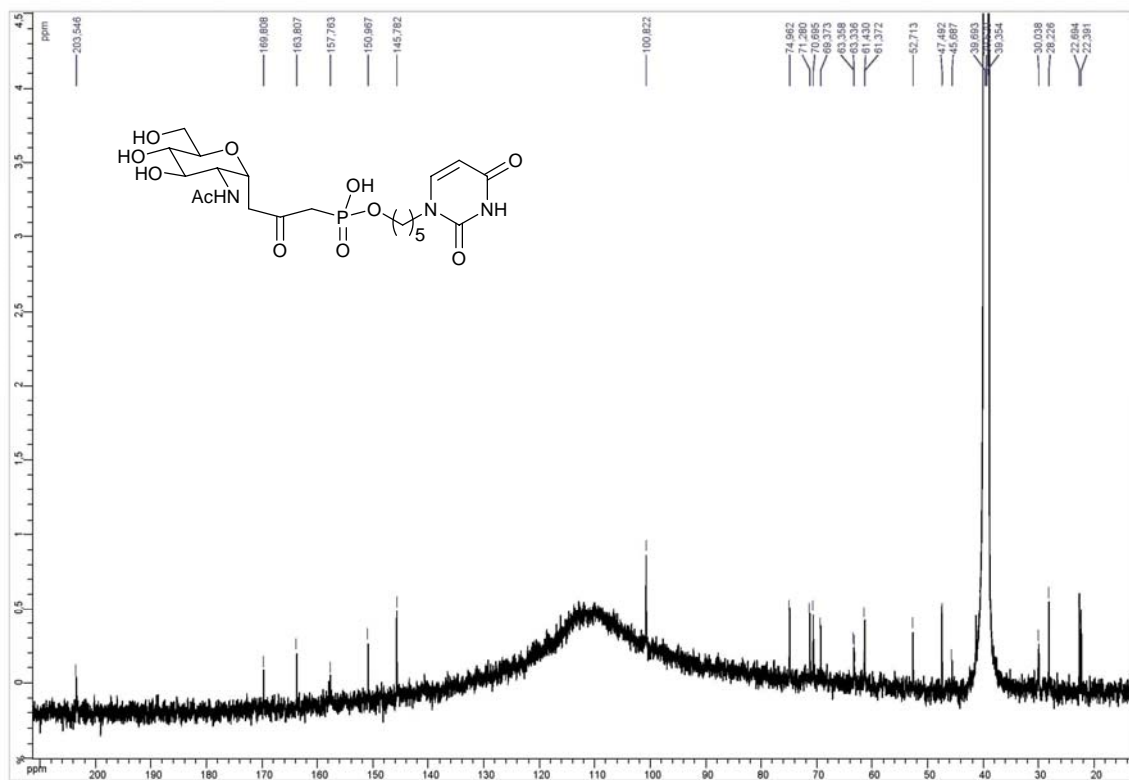

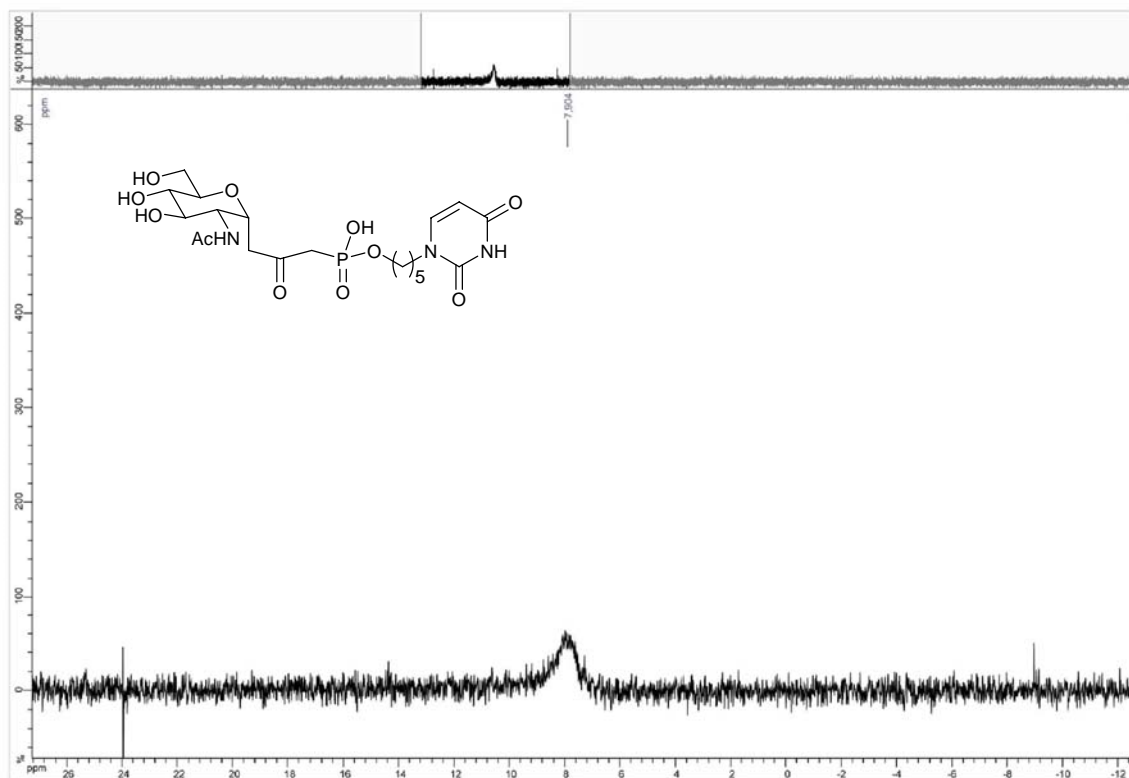

Compound **25** ( $^1\text{H}$ ,  $^{13}\text{C}$ ,  $^{31}\text{P}$ )

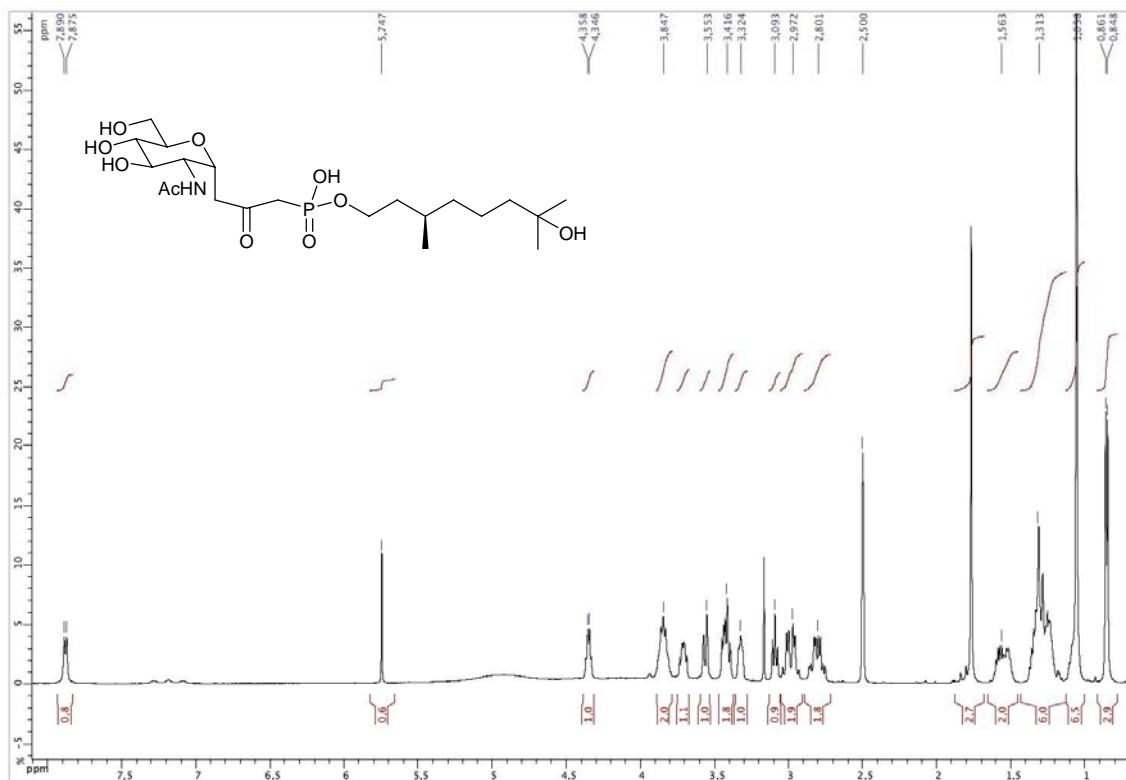

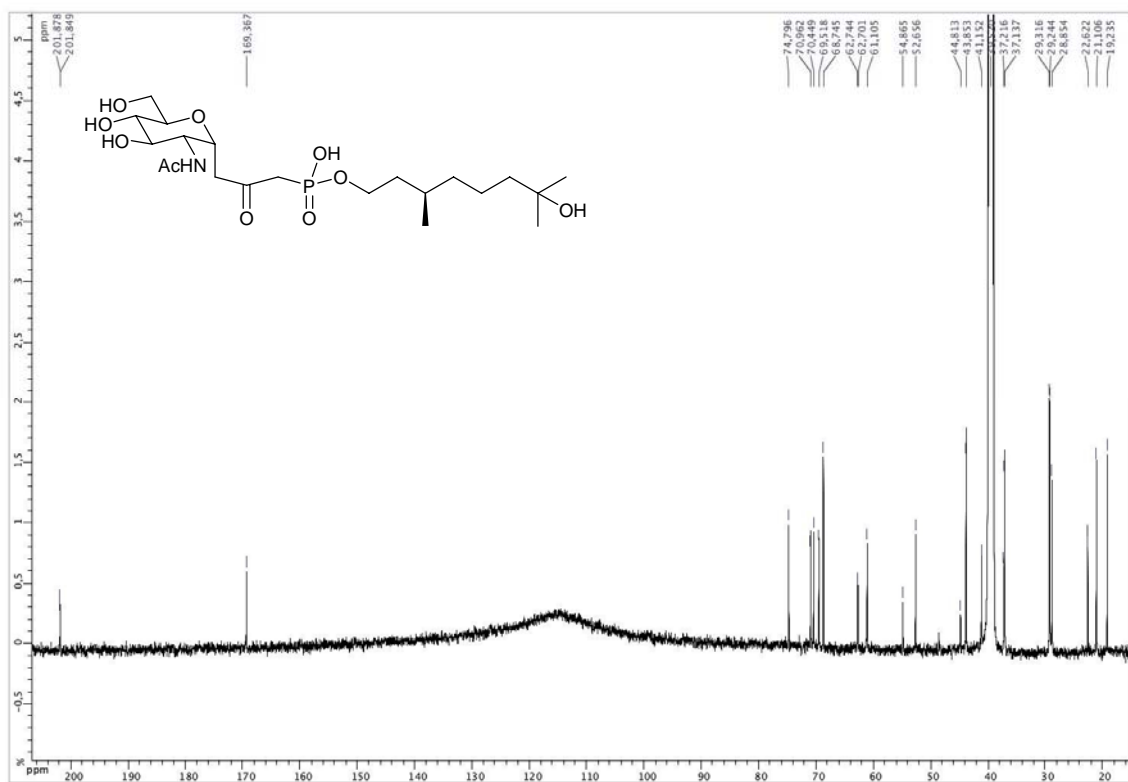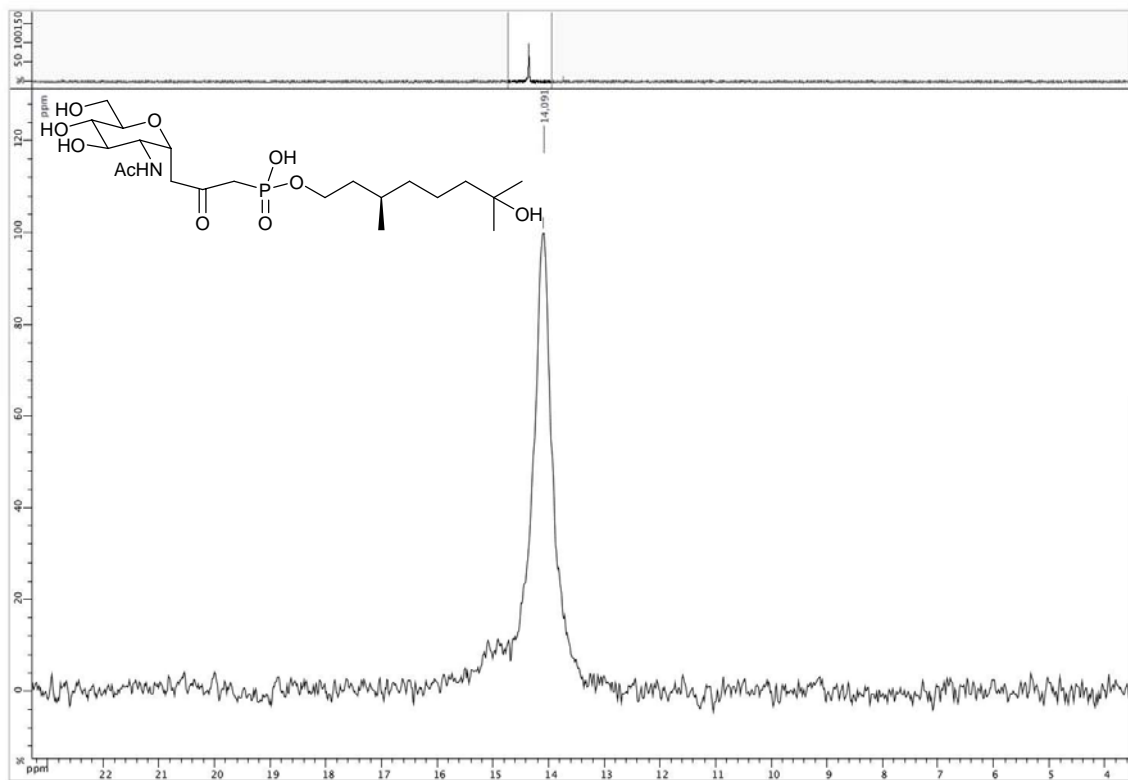

Compound **26** ( $^1\text{H}$ ,  $^{13}\text{C}$ ,  $^{31}\text{P}$ )

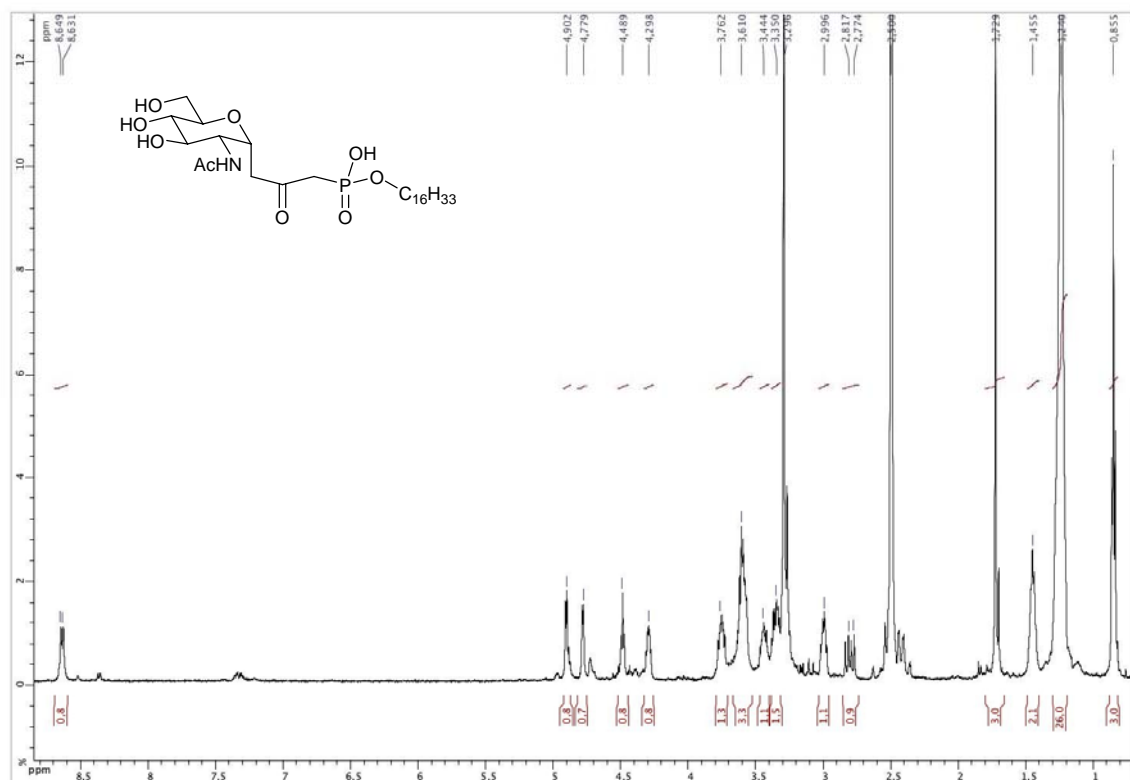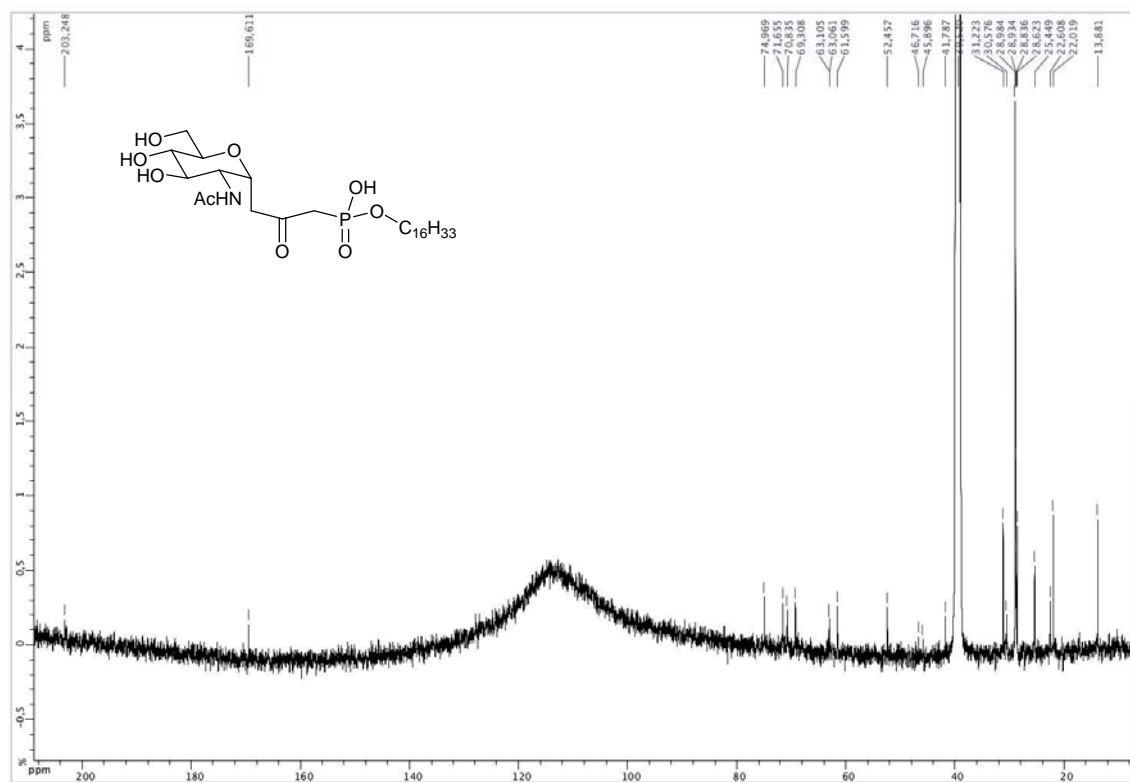

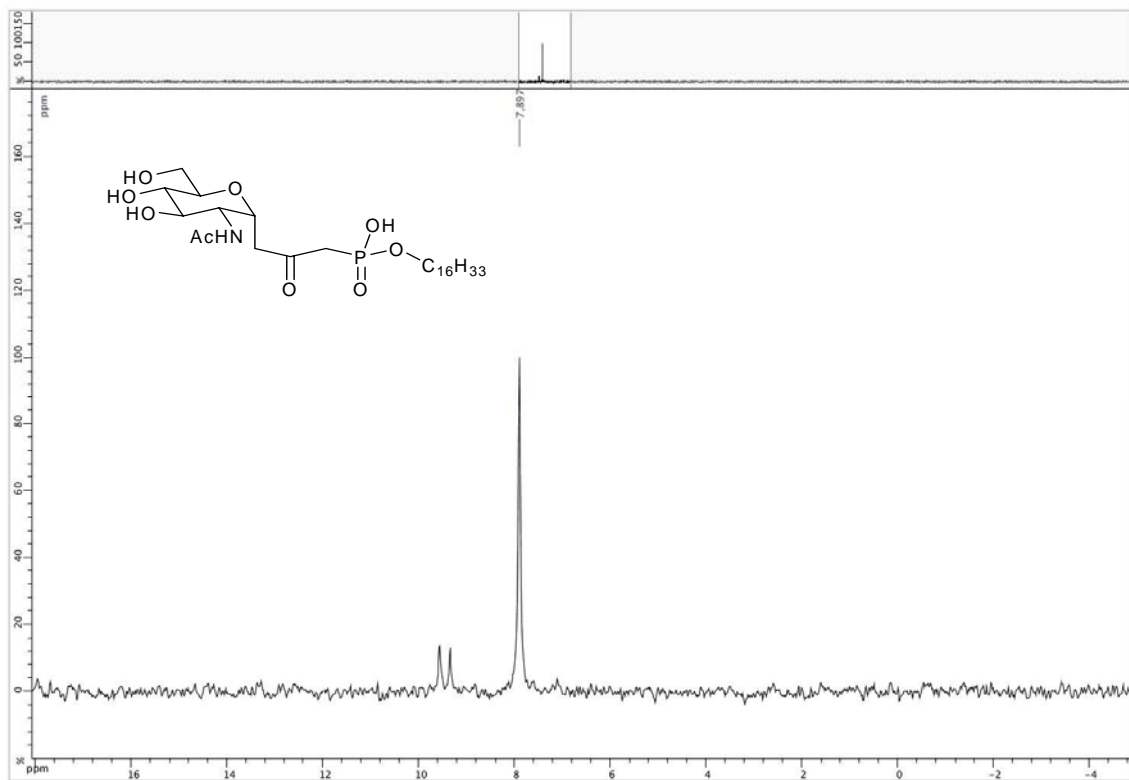

Supplement: c1ob06124k.pdf [file c1ob06124k.pdf]
